# Supplementary material for: Examining the immediate and ongoing impact of the COVID-19 pandemic on population-based estimates of dementia: a population-based time series analysis in Ontario, Canada
Source: PubMed Central journal article supplement — BMJ Open. 2023 Jan 13;13(1):e067689. doi: 10.1136/bmjopen-2022-067689 (PMC9842601; doi:10.1136/bmjopen-2022-067689), 2023-01-13
Supplement: bmjopen-2022-067689.draft_revisions.pdf [file bmjopen-2022-067689.draft_revisions.pdf]

# BMJ Open

BMJ Open is committed to open peer review. As part of this commitment we make the peer review history of every article we publish publicly available.

When an article is published we post the peer reviewers' comments and the authors' responses online. We also post the versions of the paper that were used during peer review. These are the versions that the peer review comments apply to.

The versions of the paper that follow are the versions that were submitted during the peer review process. They are not the versions of record or the final published versions. They should not be cited or distributed as the published version of this manuscript.

BMJ Open is an open access journal and the full, final, typeset and author-corrected version of record of the manuscript is available on our site with no access controls, subscription charges or pay-per-view fees (<http://bmjopen.bmj.com>).

If you have any questions on BMJ Open's open peer review process please email [info.bmjopen@bmj.com](mailto:info.bmjopen@bmj.com)

# BMJ Open

## Examining the immediate and on-going impact of the COVID-19 pandemic on population-based estimates of dementia

|                               |                                                                                                                                                                                                                                                                                                                                                                                                                                                                                                                                                                                                                           |
|-------------------------------|---------------------------------------------------------------------------------------------------------------------------------------------------------------------------------------------------------------------------------------------------------------------------------------------------------------------------------------------------------------------------------------------------------------------------------------------------------------------------------------------------------------------------------------------------------------------------------------------------------------------------|
| Journal:                      | <i>BMJ Open</i>                                                                                                                                                                                                                                                                                                                                                                                                                                                                                                                                                                                                           |
| Manuscript ID                 | bmjopen-2022-067689                                                                                                                                                                                                                                                                                                                                                                                                                                                                                                                                                                                                       |
| Article Type:                 | Original research                                                                                                                                                                                                                                                                                                                                                                                                                                                                                                                                                                                                         |
| Date Submitted by the Author: | 23-Aug-2022                                                                                                                                                                                                                                                                                                                                                                                                                                                                                                                                                                                                               |
| Complete List of Authors:     | Jones, Aaron; Hamilton, Department of Health Research Methods, Evidence, and Impact; ICES<br>Bronskill, Susan; ICES<br>Maclagan, Laura; ICES<br>Jaakkimainen, R. Liisa; University of Toronto, Department of Family and Community Medicine; Sunnybrook Health Sciences Centre, Department of Family and Community Medicine<br>Kirkwood, David; ICES<br>Mayhew, Alexandra; McMaster University, Health Research Methods, Evidence, and Impact<br>Costa, Andrew P ; Hamilton, Department of Health Research Methods, Evidence, and Impact<br>Griffith, Lauren; McMaster University, Clinical Epidemiology and Biostatistics |
| Keywords:                     | COVID-19, Dementia < NEUROLOGY, Public health < INFECTIOUS DISEASES, GERIATRIC MEDICINE                                                                                                                                                                                                                                                                                                                                                                                                                                                                                                                                   |
|                               |                                                                                                                                                                                                                                                                                                                                                                                                                                                                                                                                                                                                                           |

SCHOLARONE™  
Manuscripts

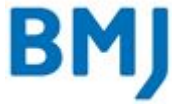

I, the Submitting Author has the right to grant and does grant on behalf of all authors of the Work (as defined in the below author licence), an exclusive licence and/or a non-exclusive licence for contributions from authors who are: i) UK Crown employees; ii) where BMJ has agreed a CC-BY licence shall apply, and/or iii) in accordance with the terms applicable for US Federal Government officers or employees acting as part of their official duties; on a worldwide, perpetual, irrevocable, royalty-free basis to BMJ Publishing Group Ltd ("BMJ") its licensees and where the relevant Journal is co-owned by BMJ to the co-owners of the Journal, to publish the Work in this journal and any other BMJ products and to exploit all rights, as set out in our [licence](#).

The Submitting Author accepts and understands that any supply made under these terms is made by BMJ to the Submitting Author unless you are acting as an employee on behalf of your employer or a postgraduate student of an affiliated institution which is paying any applicable article publishing charge ("APC") for Open Access articles. Where the Submitting Author wishes to make the Work available on an Open Access basis (and intends to pay the relevant APC), the terms of reuse of such Open Access shall be governed by a Creative Commons licence – details of these licences and which [Creative Commons](#) licence will apply to this Work are set out in our licence referred to above.

Other than as permitted in any relevant BMJ Author's Self Archiving Policies, I confirm this Work has not been accepted for publication elsewhere, is not being considered for publication elsewhere and does not duplicate material already published. I confirm all authors consent to publication of this Work and authorise the granting of this licence.

1  
2  
3 Examining the immediate and on-going impact of the COVID-19 pandemic on population-based estimates  
4 of dementia  
5  
6  
7

8 Aaron Jones, PhD<sup>1,2</sup>

9 Susan E. Bronskill, PhD<sup>2,3,4</sup>

10 Laura C. Maclagan, MSc<sup>2</sup>

11 R. Liisa Jaakkimainen, MD<sup>2,4,5</sup>

12 David Kirkwood, MSc<sup>2</sup>

13 Alexandra Mayhew, PhD<sup>1</sup>

14 Andrew P. Costa, PhD<sup>1,2\*</sup>

15 Lauren E. Griffith, PhD<sup>1\*</sup>

- 16  
17  
18 1. Department of Health Research Methods, Evidence, and Impact, McMaster University, Hamilton, Ontario,  
19 Canada  
20 2. ICES, Toronto, Ontario, Canada  
21 3. Dalla Lana School of Public Health, University of Toronto, Toronto, Ontario, Canada  
22 4. Institute of Health Policy, Management & Evaluation, University of Toronto, Toronto, Ontario, Canada  
23 5. Department of Family and Community Medicine, University of Toronto, Toronto, Ontario, Canada  
24  
25

26 \* AP and LG are co-senior authors  
27

28 **Corresponding Author**

29 Dr. Aaron Jones

30 Assistant Professor

31 Department of Health Research Methods Evidence and Impact

32 McMaster University

33 1280 Main Street W, Hamilton, Ontario, Canada L8S 4L8

34 e: [jonesa13@mcmaster.ca](mailto:jonesa13@mcmaster.ca)

35 p: 416-912-9276  
36  
37

38 **Word count:** 2,477  
39  
40  
41  
42  
43  
44  
45  
46  
47  
48  
49  
50  
51  
52  
53  
54  
55  
56  
57  
58  
59  
60

## ABSTRACT

### Objectives

Population-based chronic disease surveillance systems were likely disrupted by the COVID-19 pandemic. The objective of this study was to examine the immediate and on-going impact of COVID-19 pandemic on the claims-based incidence of dementia.

### Methods

We conducted a population-based time series analysis from January 2015 to December 2021 in Ontario, Canada. We calculated the monthly claims-based incidence of dementia using a validated case ascertainment algorithm drawing from routinely-collected health administrative data. We used autoregressive linear models to compare the claims-based incidence of dementia during the COVID-19 period (2020-2021) to the expected incidence had the pandemic not occurred, controlling for seasonality and secular trends. We examined incidence by source of ascertainment and across strata of sex, age, and community size.

### Results

The monthly claims-based incidence of dementia dropped from a 2019 average of 11.9 per 10,000 to 8.5 per 10,000 in April 2020 (32.6% lower than expected). Incidence returned to expected levels by late 2020. Across the COVID-19 period there were a cumulative 2,985 (95% CI [2,155-3,715]) fewer cases of dementia observed than expected, equivalent to 1.04 months of new cases. Despite the overall recovery, ascertainment rates continued to be lower than expected among individuals aged 65-74 years and in large urban areas.

### Conclusions

The claims-based incidence of dementia recovered to expected levels by late 2020, suggesting minimal long-term changes to population-based dementia surveillance. Continued monitoring of claims-based incidence is necessary to determine whether the on-going lower than expected incidence among individuals 65-74 and in large urban areas is transitory.

**Keywords:** COVID-19, dementia, administrative data, chronic disease surveillance

### Strengths and Limitations

- The population-based design enables examination of the research question over a large and representative population.
- The validated case ascertainment algorithm used in the study draws on health system encounters from multiple sectors.
- However, chronic disease ascertainment dates derived from health administrative data may not align with the date of clinical diagnosis.

## INTRODUCTION

Dementia case ascertainment algorithms based on health administrative data are regularly used in population-based research and chronic disease surveillance.[1–3] By tracking the incidence and prevalence of diseases over time, chronic disease surveillance systems provide critical information for public health planning and evaluation.[4] In the absence of national registries or screening programs, administrative databases are a vital source of data on the epidemiology of chronic diseases.[5] Claims-based case ascertainment methods for dementia combine information gathered from routinely-collected health records, including physician encounters, hospital admissions, and dementia-specific medication use, to identify individuals who are likely to have been diagnosed with dementia. The performance of these algorithms varies by setting and jurisdiction, but they typically achieve high positive predictive value with reasonable sensitivity [6]. While these algorithms have clear utility, there are also known challenges as the methods depend on interactions with the health system which can be used to identify dementia diagnoses.[7] Accurate ascertainment requires equitable and consistent access to health services and recording of relevant diagnoses.

The extent and longevity of any impact of the COVID-19 pandemic on claims-based incidence of dementia has important implications for the use of population-based dementia estimates. A temporary drop in the claims-based incidence due to lockdowns, avoidance of in-person visits, and reduced access to community-based physician care may amount to a mere historical anomaly. However, given the upheaval in health service use during the pandemic, including the rapid uptake of virtual care[8] and changes in the diagnostic reasons for visits[9], long-term impacts to population-based dementia estimates are certainly plausible. Evidence of persistent change in claims-based incidence may indicate that the ability of the case ascertainment algorithm to identify persons with dementia has been altered and limit the comparison of population-based dementia estimates over time. The objective of this study was to examine how the claims-based incidence of dementia changed across the COVID-19 period in Ontario, Canada, both immediately at the start of the pandemic, as well as over time. We examined

1  
2  
3 differences in the claims-based incidence across contributing data sources (physician encounters, hospital  
4 admissions, medications) and across sociodemographic strata of age, sex, and community size.  
5  
6  
7  
8  
9

## 10 11 **METHODS**

### 12 13 14 **Setting and Study Design**

15  
16  
17 We conducted a time series analysis using population-based health administrative datasets in Ontario,  
18 Canada. Ontario has a population of approximately 15 million individuals, including more than 2 million over the  
19 age of 65 years.[10] Ontario's health system includes publicly-funded universal health insurance for medically  
20 necessary services, including physician care, hospital-based care, and medication coverage for individuals aged 65  
21 years and older.  
22  
23  
24  
25  
26  
27  
28

### 29 **Population**

30  
31  
32 Our population was an open cohort of older adults 65 years at risk of dementia. We included older adults  
33 living in both community and congregate care settings.  
34  
35  
36

### 37 **Dementia case ascertainment**

38  
39  
40 We used the dementia case definition from the Canadian Chronic Disease Surveillance System.[11] The  
41 validated algorithm identifies individuals likely diagnosed with dementia using the following criteria: 1.) three  
42 separate physician encounters with a dementia ICD-9/10 code, each at least one month apart; or 2.) a single  
43 hospital admission with a dementia ICD-9/10 code; or 3.) a single dispensation of a dementia-specific medication.  
44  
45  
46  
47  
48  
49 The ascertainment date is identified as the earliest of the hospital admission date, the medication dispensation  
50 date, or the last date of the physician encounter sequence. A full definition of the algorithm including all ICD-9/10  
51 codes and drug identification numbers is listed in Supplemental Table 1. In Ontario, the algorithm has been  
52  
53  
54  
55  
56  
57  
58  
59  
60

1  
2  
3 validated in a primary care setting with a sensitivity of 79.3%, a specificity of 99.1%, and a positive predictive value  
4  
5 of 80.4%.[12]  
6  
7

## 8 **Data sources**

9

10  
11 Diagnosis codes from physician encounters and hospital admissions were extracted from the Ontario  
12  
13 Health Insurance Plan database and the Canadian Institute for Health Information's Discharge Abstract Database,  
14  
15 respectively. Medication use was captured from the Ontario Drug Benefit database. Ontario's insurable population  
16  
17 was identified using the Registered Persons Database. These datasets were linked using unique encoded identifiers  
18  
19 and analyzed at ICES. ICES is an independent, non-profit research institute whose legal status under Ontario's  
20  
21 health information privacy law allows it to collect and analyze health care and demographic data, without consent,  
22  
23 for health system evaluation and improvement.  
24  
25  
26

## 27 **Claims-based incidence of dementia**

28

29  
30 We calculated the monthly claims-based incidence of dementia per 10,000 individuals among older adults  
31  
32 (65+ years) in Ontario at risk of dementia between January 2015 to December 2021. The incidence was calculated  
33  
34 as the number of new ascertainties in a month, divided by the population at risk of dementia at the start of the  
35  
36 month, divided by the count of days in the month, multiplied by 30.  
37  
38  
39

## 40 **Statistical analysis**

41

42  
43 We fit autoregressive linear regression models to the monthly claims-based dementia incidence. The  
44  
45 model was fit on the pre-COVID-19 pandemic period (2015 to 2019), controlling for seasonality via a categorical  
46  
47 variable for month and secular trend via a linear term on the number of months since beginning of the time series.  
48  
49 This model was used to generate the expected incidence of claims-based dementia from 2020-2021 (COVID-19  
50  
51 period), had the pandemic not occurred. We calculated relative and absolute differences between observed and  
52  
53 expected claims-based dementia incidence. We characterized the initial decline in claims-based incidence by  
54  
55  
56  
57  
58  
59  
60



1  
2  
3 comparing the observed and expected incidence at the month of the lowest observed incidence in 2020. We  
4  
5 calculated the difference between the count of observed and expected dementia case ascertainment by applying  
6  
7 the difference between the between the observed and expected incidences to the population at risk each month.  
8  
9 We examined cumulative differences in the count of observed and expected dementia case ascertainment within  
10  
11 calendar years and across the entire COVID-19 period. We constructed 95% confidence intervals around the  
12  
13 cumulative differences in case ascertainment during the COVID-19 period using a 5000-replicate block  
14  
15 bootstrap[13] with a block size of 3 months. To facilitate comparison across strata of different sizes, we expressed  
16  
17 the cumulative difference in case ascertainment in terms of the number of months of new ascertainment they  
18  
19 represent based on 2019 figures.  
20  
21  
22  
23

24 We stratified the main analysis by data source (physician encounters, hospital admissions, medications) to  
25  
26 identify whether certain sources were more strongly affected by the pandemic. We additionally stratified by age  
27  
28 (65-74,75-84,85+, sex (male vs. female), and community size (large urban, small urban, rural) to explore differential  
29  
30 effects across sociodemographic strata. Community size was defined using the Rurality Index of Ontario[14]. All  
31  
32 analyses were performed using R version 4.0.3.[15]  
33  
34  
35

### 36 **Sensitivity analysis**

37  
38 To examine whether any changes in claims-based incidence were specific to dementia, we repeated the  
39  
40 analysis on the claims-based incidence of diabetes in older adults.[16] Diabetes was chosen as based on the  
41  
42 similarity of the diabetes algorithm to that of the dementia algorithm.  
43  
44  
45

### 46 **Patient and Public Involvement**

47  
48  
49 No patients were involved at the conduct of this study due to limited time and resources. We have invited  
50  
51 patients and stakeholders to help us develop and carry out our knowledge dissemination strategy.  
52  
53

## 54 **RESULTS**

The population of the older adults at risk of dementia varied from 2,030,431 (January 2015) to 2,569,017 (December 2021). The monthly claims-based incidence of dementia declined slightly across the pre-COVID-19 period from an average of 12.5 cases per 10,000 in 2015 to 11.9 cases per 10,000 in 2019. Physician encounters were the most common source of case ascertainment across the entire time series, representing approximately 50% of new cases. Claims-based incidence dropped sharply during the first months of the COVID-19 period reaching a nadir of 8.5 per 1,000 in April 2020 (32.6% less than expected) (Table 1). By late 2020, the observed incidence had returned to the pre-pandemic expected incidence but did not rebound above expected levels (Figure 1).

**Table 1.** Observed and expected claims-based dementia incidence with relative and absolute differences, Jan 2020 to Dec 2021, Ontario, Canada

| Month                                       | Observed incidence | Expected incidence | Relative difference | Absolute difference in cases <sup>1,2</sup> | Cumulative difference in cases since Jan 2020 | Cumulative difference in months of expected cases <sup>3</sup> |
|---------------------------------------------|--------------------|--------------------|---------------------|---------------------------------------------|-----------------------------------------------|----------------------------------------------------------------|
| Jan-20                                      | 12.5               | 12.1               | 3%                  | 94                                          | 94                                            | 0.03                                                           |
| Feb-20                                      | 10.5               | 11.5               | -8%                 | -225                                        | -130                                          | -0.05                                                          |
| Mar-20                                      | 9.3                | 11.5               | -19%                | -540                                        | -671                                          | -0.23                                                          |
| Apr-20                                      | 8.5                | 12.6               | -33%                | -1012                                       | -1683                                         | -0.59                                                          |
| May-20                                      | 9.0                | 12.2               | -26%                | -780                                        | -2463                                         | -0.86                                                          |
| Jun-20                                      | 10.2               | 12.2               | -17%                | -501                                        | -2964                                         | -1.04                                                          |
| Jul-20                                      | 10.7               | 11.3               | -6%                 | -161                                        | -3125                                         | -1.09                                                          |
| Aug-20                                      | 10.1               | 10.9               | -8%                 | -213                                        | -3338                                         | -1.17                                                          |
| Sep-20                                      | 11.5               | 11.6               | -1%                 | -30                                         | -3368                                         | -1.18                                                          |
| Oct-20                                      | 11.5               | 11.8               | -3%                 | -77                                         | -3445                                         | -1.21                                                          |
| Nov-20                                      | 11.9               | 12.4               | -4%                 | -114                                        | -3559                                         | -1.25                                                          |
| Dec-20                                      | 10.7               | 10.3               | 4%                  | 110                                         | -3450                                         | -1.21                                                          |
| Jan-21                                      | 10.9               | 11.9               | -8%                 | -250                                        | -3700                                         | -1.29                                                          |
| Feb-21                                      | 11.5               | 11.3               | 1%                  | 43                                          | -3657                                         | -1.28                                                          |
| Mar-21                                      | 12.6               | 11.4               | 11%                 | 311                                         | -3346                                         | -1.17                                                          |
| Apr-21                                      | 11.7               | 12.5               | -6%                 | -191                                        | -3536                                         | -1.24                                                          |
| May-21                                      | 11.4               | 12.0               | -6%                 | -172                                        | -3708                                         | -1.30                                                          |
| Jun-21                                      | 12.6               | 12.0               | 5%                  | 148                                         | -3560                                         | -1.25                                                          |
| Jul-21                                      | 11.1               | 11.2               | -1%                 | -20                                         | -3581                                         | -1.25                                                          |
| Aug-21                                      | 11.2               | 10.8               | 4%                  | 106                                         | -3474                                         | -1.22                                                          |
| Sep-21                                      | 11.9               | 11.4               | 4%                  | 129                                         | -3345                                         | -1.17                                                          |
| Oct-21                                      | 12.0               | 11.7               | 3%                  | 80                                          | -3266                                         | -1.14                                                          |
| Nov-21                                      | 13.0               | 12.2               | 6%                  | 205                                         | -3061                                         | -1.07                                                          |
| Dec-21                                      | 10.4               | 10.1               | 3%                  | 76                                          | -2985                                         | -1.04                                                          |
| 2020 Cumulative difference in cases (95%CI) |                    |                    |                     |                                             | -3,449 (-3768,-3,099)                         |                                                                |

|                                                  |                       |
|--------------------------------------------------|-----------------------|
| 2021 Cumulative difference in cases (95%CI)      | 465 (43, 929)         |
| 2020-2021 Cumulative difference in cases (95%CI) | -2,985 (-3,715-2,155) |

1. Calculated as difference between observed and expected incidence multiplied by population at risk of dementia, rounded to whole number
2. Rounded to whole number
3. Based on monthly average of new ascertainties in 2019

Between January 2020 and December 2021, there were a cumulative 2,985 (95% CI: 2,155-3,715) fewer case ascertainties observed than expected, a gap equivalent to 1.04 months of cases based on 2019 averages. The vast majority of the fewer-than-expected ascertainties were accumulated between February 2020 and June 2020. Across 2021 as a whole, there were slightly more cases observed than expected (465 cases (95% CI: 43, 929)). In each of the final five months of the time series, the observed count exceeded the expected count by 3%-6% (Table 1).

All data sources exhibited drops in claims-based incidence during the first months of the pandemic, with medication use demonstrating the largest relative decrease (59.4%) in April 2020, compared to 26.9% for physician encounters, and 27.4% for hospital admissions (Figure 2, Table 2). After the initial decline, ascertainties in the hospital setting recovered the quickest, followed by medication use. Throughout 2021, observed case ascertainment from physician encounters continued to lag behind expected ascertainties, while observed ascertainties in the other settings exceeded the expected number of cases.

**Table 2.** Changes in the claims-based dementia incidence during the COVID-19 pandemic with cumulative differences between observed and expected cases, by data source, sex, age, and community size, in Ontario, Canada

1

2

3

4

5

6

7

8

9

10

11

12

13

14

15

16

17

18

19

20

21

22

23

24

25

26

27

28

29

30

31

32

33

34

35

36

37

38

39

40

41

42

43

44

45

46

47

48

49

50

51

52

53

54

55

56

57

58

59

60

**Data source**

| Measure | Overall | Data source          |                     |                |
|---------|---------|----------------------|---------------------|----------------|
|         |         | Physician encounters | Hospital admissions | Medication use |

|                                                                                       |                      |                      |                    |                      |
|---------------------------------------------------------------------------------------|----------------------|----------------------|--------------------|----------------------|
| 2019 Average incidence / 10,000                                                       | 11.9                 | 6.2                  | 2.9                | 2.7                  |
| 2020 Nadir incidence / 10,000                                                         | 8.5                  | 4.9                  | 2.1                | 1.1                  |
| Percent drop in incidence at nadir vs. expected                                       | 32.6%                | 26.9%                | 27.4%              | 59.4%                |
| 2020 Cumulative difference observed vs. expected cases (in months of new cases)1      | -1.21 (-1.32, -1.08) | -1.63 (-1.53, 1.41)  | 0.32 (-0.03, 0.72) | -1.78 (-2.19, -1.38) |
| 2021 Cumulative difference observed vs. expected cases (in months of new cases)1      | 0.16 (0.01, 0.32)    | -1.23 (-1.52, -0.94) | 1.90 (1.43, 2.45)  | 1.51 (0.96, 2.04)    |
| 2020-2021 Cumulative difference observed vs. expected cases (in months of new cases)1 | -1.04 (-1.29, -0.74) | -2.86 (-3.36, -2.35) | 2.23 (1.38, 3.17)  | -0.27 (-1.23, 0.66)  |

**Sex**

| Measure | Overall | Sex  |        |
|---------|---------|------|--------|
|         |         | Male | Female |

|                                                                                       |                      |                      |                      |
|---------------------------------------------------------------------------------------|----------------------|----------------------|----------------------|
| 2019 Average incidence / 10,000                                                       | 11.9                 | 10.7                 | 12.9                 |
| 2020 Nadir incidence / 10,000                                                         | 8.5                  | 7.4                  | 9.4                  |
| Percent drop in incidence at nadir vs. expected                                       | 32.6%                | 34.6%                | 31.1%                |
| 2020 Cumulative difference observed vs. expected cases (in months of new cases)1      | -1.21 (-1.32, -1.08) | -1.06 (-1.23, -0.88) | -1.32 (-1.47, -1.16) |
| 2021 Cumulative difference observed vs. expected cases (in months of new cases)1      | 0.16 (0.01, 0.32)    | 0.32 (0.10, 0.55)    | 0.04 (-0.16, 0.26)   |
| 2020-2021 Cumulative difference observed vs. expected cases (in months of new cases)1 | -1.04 (-1.29, -0.74) | -0.73 (-1.13, -0.33) | -1.28 (-1.63, -0.90) |

**Age**

| Measure | Overall | Age   |       |     |
|---------|---------|-------|-------|-----|
|         |         | 65-74 | 76-85 | 85+ |

|                                                                                       |                      |                      |                      |                      |
|---------------------------------------------------------------------------------------|----------------------|----------------------|----------------------|----------------------|
| 2019 Average incidence / 10,000                                                       | 11.9                 | 3.7                  | 15.9                 | 42.4                 |
| 2020 Nadir incidence / 10,000                                                         | 8.5                  | 2.7                  | 10.8                 | 31.5                 |
| Percent drop in incidence at nadir vs. expected                                       | 32.6%                | 30.1%                | 35.9%                | 30.1%                |
| 2020 Cumulative difference observed vs. expected cases (in months of new cases)1      | -1.21 (-1.32, -1.08) | -1.37 (-1.63, -1.12) | -1.22 (-1.40, -1.03) | -1.05 (-1.24, -0.85) |
| 2021 Cumulative difference observed vs. expected cases (in months of new cases)1      | 0.16 (0.01, 0.32)    | -0.30 (-0.58, -0.03) | 0.39 (0.14, 0.64)    | 0.22 (-0.04, 0.47)   |
| 2020-2021 Cumulative difference observed vs. expected cases (in months of new cases)1 | -1.04 (-1.29, -0.74) | -1.67 (-2.26, -1.10) | -0.83 (-1.27, -0.40) | -0.83 (-1.29, 0.39)  |

**Community size**

| Measure                                                                                           | Overall              | Large Urban          | Small Urban          | Rural                |
|---------------------------------------------------------------------------------------------------|----------------------|----------------------|----------------------|----------------------|
| 2019 Average incidence / 10,000                                                                   | 11.9                 | 12.4                 | 10.9                 | 10.9                 |
| 2020 Nadir incidence / 10,000                                                                     | 8.5                  | 9.0                  | 7.6                  | 7.4                  |
| Percent drop in incidence at nadir vs. expected                                                   | 32.6%                | 32.3%                | 32.3%                | 36.1%                |
| 2020 Cumulative difference observed vs. expected cases (in months of new cases) <sup>1</sup>      | -1.21 (-1.32, -1.08) | -1.46 (-1.25, -1.54) | -0.53 (-0.24, -0.81) | -0.89 (-1.43, -0.33) |
| 2021 Cumulative difference observed vs. expected cases (in months of new cases) <sup>1</sup>      | 0.16 (0.01, 0.32)    | -0.20 (-0.36, -0.02) | 0.94 (0.61, 1.30)    | 0.04 (-0.69, 0.77)   |
| 2020-2021 Cumulative difference observed vs. expected cases (in months of new cases) <sup>1</sup> | -1.04 (-1.29, -0.74) | -1.62 (-1.90, -1.26) | 0.41 (-0.20, 0.90)   | -0.86 (-2.11, 0.44)  |

1. Cumulative difference between observed and expected cases expressed in terms of the number of months of new cases based on 2019 figures

### Analysis across sociodemographic strata

Initial declines in claims-based incidence across sociodemographic strata were broadly similar, with the smallest drop at 30.1% less than expected among individuals 85+ and the largest drop at 35.6% less than expected among individuals living in rural locations (Figure 2, Table 2). Recoveries were uneven however, and ascertainment in 2021 among individuals aged 65-74 and those residing in large urban locations tracked below expected levels, while ascertainment among those in small urban locations tracked significantly higher.

### Sensitivity analysis

The claims-based incidence of diabetes exhibited a larger initial drop than dementia (50.5% less than expected) in April 2020 but returned to expected values along a similar timeline (Supplementary Table 2). However, the claims-based diabetes incidence consistently exceeded expected levels in 2021. Cumulative ascertainment during the COVID-19 period for diabetes turned positive in September 2021 and as of December 2021 there were 1.05 months more diabetes ascertainment more observed than expected.

## DISCUSSION

1  
2  
3 We found that the claims-based incidence of dementia in Ontario dropped sharply at the start of the  
4 COVID-19 pandemic in 2020. Claims-based incidence returned to expected levels by the end of 2020 but did not  
5 appreciably rebound above the expected levels. As a result, across the entire pandemic period there have been  
6 significantly fewer dementia ascertainties observed than expected. Although the overall incidence returned to  
7 normal levels, ascertained cases via physician encounters, among individuals 65-74 years of age, and in large urban  
8 areas continued to lag behind expected counts.  
9  
10  
11  
12  
13  
14  
15

16  
17 The drop in the claims-based incidence of dementia in early 2020 mirrors the reductions in health service  
18 use that occurred at the same time[8,17,18]. The rapid return of the observed claims-based incidence to the  
19 expected incidence also tracks health service use rebound and broadly suggests no major long-term changes to the  
20 performance of the case ascertainment algorithms. However, unlike diabetes, the claims-based incidence of  
21 dementia did not rebound above expected levels in 2021 to eliminate the gap in ascertainties that accumulated  
22 across 2020. This small, but enduring, ascertainment gap and unevenness of the rebound across sociodemographic  
23 strata warrant continued close monitoring to determine whether these effects are transitory.  
24  
25  
26  
27  
28  
29  
30  
31  
32

33  
34 Between January 2020 and December 2021, the cumulative count of dementia ascertainties was roughly  
35 one months' worth of cases fewer than what we would have expected had the pandemic not occurred. Although  
36 the observed counts of dementia cases exceeded the expected counts in each of the final several months of 2021,  
37 the narrowing of the ascertainment gap has been slight. The trend in dementia cases stands in sharp contrast to  
38 the claims-based incidence of diabetes, which rebounded significantly above expected levels during 2021. One  
39 possible explanation for the persistent undercount in dementia cases is that the COVID-19 pandemic may have  
40 resulted in higher relative mortality rates among individuals at higher risk of developing dementia[19], for example  
41 residents of congregate care settings. This is at best a partial explanation however, as higher mortality cannot  
42 account for the dramatic shifts in the claims-based incidence that follow the decline and rebound in health service  
43 use. The ascertainment gap is more likely a result of changes in health-seeking behavior, patient access to health  
44 care services, and delivery of health services during the pandemic and recovery. Notably, we found that  
45  
46  
47  
48  
49  
50  
51  
52  
53  
54  
55  
56  
57  
58  
59  
60

1  
2  
3 ascertainments from physician encounters lagged expected counts throughout the entire pandemic period, despite  
4 the fact that overall physician visit volumes recovered to normal levels in 2020[20]. This may be related to the rapid  
5 uptake of virtual care as the challenges of performing cognitive testing virtually may initially lead to fewer or  
6 delayed diagnoses of dementia as physicians adapt to new tools[21,22]. Virtual care may also be less accessible to  
7 older adults living with frailty or without a caregiver[23]. Finally, ascertainments via physician encounters are more  
8 susceptible to disruption as the algorithm requires a specific number of visits within a specific time frame. An  
9 interruption in access may break the sequence of visits and delay ascertainment.  
10  
11  
12  
13  
14  
15  
16  
17  
18

19 The on-going lower than expected claims-based incidence among individuals aged 65-74 is likely also  
20 related to health system disruption and recovery during the pandemic. Younger individuals utilize less care on  
21 average and experienced greater relative reductions in health service use during the pandemic compared to older  
22 individuals[20]. Therefore, it may take more time for the ascertainment rates for younger individuals to regain their  
23 normal levels. The lower than expected incidence within large urban areas is at a glance surprising as individuals  
24 within these areas typically have the greatest access to health care[24]. However, the shift to virtual visits was  
25 most pronounced in urban areas.[8] Additionally, urban areas were under strict public health measures for longer  
26 periods of time and therefore individuals in the these areas may have experienced longer delays in resuming  
27 normal health service use levels[25].  
28  
29  
30  
31  
32  
33  
34  
35  
36  
37  
38  
39

40 At a minimum, our findings indicate that the early months of the pandemic are a historical anomaly in  
41 population-based dementia estimates that will need to be accounted for in on-going dementia surveillance.  
42 Additionally, research studies that rely on claims-based dementia ascertainment to generate cohorts or define  
43 outcomes need to carefully consider the impact of the pandemic on their research. The difference between the  
44 trends in claims-based incidence of dementia and diabetes in our study also suggests the need to examine a broad  
45 set of chronic disease case ascertainment algorithms to determine how they differed during the COVID-19 era. As  
46 evidence emerges that that the likelihood of developing certain chronic diseases is increased following COVID-19  
47 infections, monitoring a wide range of chronic diseases on a population level should be a public health priority.[26]  
48  
49  
50  
51  
52  
53  
54  
55  
56  
57  
58  
59  
60

## Limitations

Case ascertainment from administrative data are gleaned from health system encounters and therefore do not perfectly correspond to clinical diagnoses or necessarily represent the experience of the individual. Additionally, differences in the severity of COVID-19 pandemic and public health system response may result in differences in how population-based dementia estimates have changed across jurisdictions.

## Conclusion

Claimed-based dementia incidence as estimated from routinely-collected data fell early in the COVID-19 pandemic but returned to expected levels by late 2020. However, as of the end of 2021 there were still significantly fewer cumulative dementia cases observed than expected across the pandemic period. Rates of case ascertainment were lower than expected among individuals 65-74 years old and in large urban areas even after health service use rebounded. Continued population-based monitoring of dementia incidence is necessary to identify whether these effects are transitory.

## ETHICS APPROVAL STATEMENT

ICES is an independent, non-profit research institute whose legal status under Ontario's health information privacy law allows it to collect and analyze health care and demographic data, without consent, for health system evaluation and improvement. The use of the data in this project is authorized under section 45 of Ontario's Personal Health Information Protection Act (PHIPA) and does not require review by a Research Ethics Board.

## DATA SHARING STATEMENT

The dataset from this study is held securely in coded form at ICES. While data sharing agreements prohibit ICES from making the dataset publicly available, access may be granted to those who meet prespecified criteria for confidential access, available at [www.ices.on.ca/DAS](http://www.ices.on.ca/DAS). The full dataset creation plan and underlying analytic code are available from the authors upon request, understanding that the computer programs may rely upon coding templates or macros that are unique to ICES and are therefore either inaccessible or may require modification.

## CONTRIBUTORS

AJ, AC, and LG conceived the work. AJ developed the design and conducted all analyses. DK performed data curation. AJ wrote the initial draft. All authors contributed to the interpretation of the work and revised the work for critical intellectual content.

## COMPETING INTERERSTTS

None to report



## FUNDING

This study received funding from the Public Health Agency of Canada (2021-HQ-000076). This study was supported by ICES, which is funded by an annual grant from the Ontario Ministry of Health and the Ministry of Long-Term Care.

## DISCLAIMER

Parts of this material are based on data and information compiled and provided by the Canadian Institute for Health Information. However, the analyses, conclusions, opinions, and statements expressed in the material are those of the author(s), and not necessarily those of the Canadian Institute for Health Information. The analyses, conclusions, opinions, and statements expressed herein are solely those of the authors and do not reflect those of the funding or data sources; no endorsement is intended or should be inferred. We thank IQVIA Solutions Canada Inc for use of their Drug Information File.

## References

- 1 Davis MA, Chang C-H, Simonton S, *et al.* Trends in US Medicare Decedents' Diagnosis of Dementia From 2004 to 2017. *JAMA Health Forum* 2022;**3**:e220346. doi:10.1001/jamahealthforum.2022.0346
- 2 Jones A, Maclagan LC, Watt JA, *et al.* Reasons for repeated emergency department visits among community-dwelling older adults with dementia in Ontario, Canada. *Journal of the American Geriatrics Society* 2022;**n/a**. doi:10.1111/jgs.17726
- 3 Welberry HJ, Brodaty H, Hsu B, *et al.* Measuring dementia incidence within a cohort of 267,153 older Australians using routinely collected linked administrative data. *Sci Rep* 2020;**10**:8781. doi:10.1038/s41598-020-65273-w
- 4 Thacker SB, Stroup DF, Rothenberg RB, *et al.* Public health surveillance for chronic conditions: A scientific basis for decisions. *Statistics in Medicine* 1995;**14**:629–41. doi:10.1002/sim.4780140520
- 5 Lix LM, Yogendran MS, Shaw SY, *et al.* Population-based data sources for chronic disease surveillance. *Chronic Dis Can* 2008;**29**:31–8.
- 6 Wilkinson T, Ly A, Schnier C, *et al.* Identifying dementia cases with routinely collected health data: A systematic review. *Alzheimers Dement* 2018;**14**:1038–51. doi:10.1016/j.jalz.2018.02.016
- 7 Festa N, Price M, Moura LMVR, *et al.* Evaluation of Claims-Based Ascertainment of Alzheimer Disease and Related Dementias Across Health Care Settings. *JAMA Health Forum* 2022;**3**:e220653. doi:10.1001/jamahealthforum.2022.0653
- 8 Glazier RH, Green ME, Wu FC, *et al.* Shifts in office and virtual primary care during the early COVID-19 pandemic in Ontario, Canada. *CMAJ* 2021;**193**:E200–10. doi:10.1503/cmaj.202303
- 9 Stephenson E, Butt DA, Gronsbell J, *et al.* Changes in the top 25 reasons for primary care visits during the COVID-19 pandemic in a high-COVID region of Canada. *PLOS ONE* 2021;**16**:e0255992. doi:10.1371/journal.pone.0255992

- 10 Ontario population projections. Ontario.ca. <http://ontario-v2.vpc.ont/page/ontario-population-projections> (accessed 24 Aug 2021).
- 11 Canada PHA of. The Canadian Chronic Disease Surveillance System – An Overview. 2018. <https://www.canada.ca/en/public-health/services/publications/canadian-chronic-disease-surveillance-system-factsheet.html> (accessed 6 Jun 2022).
- 12 Jaakkimainen RL, Bronskill SE, Tierney MC, *et al.* Identification of Physician-Diagnosed Alzheimer’s Disease and Related Dementias in Population-Based Administrative Data: A Validation Study Using Family Physicians’ Electronic Medical Records. *J Alzheimers Dis* 2016;**54**:337–49. doi:10.3233/JAD-160105
- 13 Lahiri SN. Theoretical Comparisons of Block Bootstrap Methods. *The Annals of Statistics* 1999;**27**:386–404.
- 14 Kralj B. Measuring Rurality - RIO2008\_BASIC: Methodology and Results. Toronto: : Ontario Medical Association 2009. [https://docplayer.net/91599736-Measuring-rurality-rio2008\\_basic-methodology-and-results.html](https://docplayer.net/91599736-Measuring-rurality-rio2008_basic-methodology-and-results.html) (accessed 20 Apr 2021).
- 15 R Core Team. *R: A language and environment for statistical computing*. Vienna, Austria: 2020.
- 16 Lipscombe LL, Hwee J, Webster L, *et al.* Identifying diabetes cases from administrative data: a population-based validation study. *BMC Health Services Research* 2018;**18**:316. doi:10.1186/s12913-018-3148-0
- 17 Bronskill SE, Maclagan LC, Maxwell CJ, *et al.* Trends in Health Service Use for Canadian Adults With Dementia and Parkinson Disease During the First Wave of the COVID-19 Pandemic. In: *JAMA Health Forum*. American Medical Association 2022. e214599–e214599.
- 18 Axenhus M, Schedin-Weiss S, Tjernberg L, *et al.* Changes in dementia diagnoses in Sweden during the COVID-19 pandemic. *BMC Geriatr* 2022;**22**:365. doi:10.1186/s12877-022-03070-y
- 19 Wang Y, Li M, Kazis LE, *et al.* Clinical outcomes of COVID-19 infection among patients with Alzheimer’s disease or mild cognitive impairment. *Alzheimers Dement* 2022;**18**:911–23. doi:10.1002/alz.12665
- 20 COVID-19’s impact on physician services | CIHI. <https://www.cihi.ca/en/covid-19-resources/impact-of-covid-19-on-canadas-health-care-systems/physician-services> (accessed 7 Jun 2022).
- 21 Saxena S, Factora R, Hashmi A, *et al.* Assessing cognition in the era of COVID19: Do we need methods to assess cognitive function virtually? *Alzheimers Dement* 2021;**17 Suppl 8**:e050074. doi:10.1002/alz.050074
- 22 Watt JA, Lane NE, Veroniki AA, *et al.* Diagnostic accuracy of virtual cognitive assessment and testing: Systematic review and meta-analysis. *Journal of the American Geriatrics Society* 2021;**69**:1429–40.
- 23 Liu L, Goodarzi Z, Jones A, *et al.* Factors associated with virtual care access in older adults: a cross-sectional study. *Age Ageing* 2021;**50**:1412–5. doi:10.1093/ageing/afab021
- 24 Geographic Variation in the Supply and Distribution of Comprehensive Primary Care Physicians in Ontario, 2014/15. <https://www.ices.on.ca/Publications/Atlases-and-Reports/2017/Geographic-variation-in-physician-supply> (accessed 29 Jun 2022).

- 1  
2  
3 25 COVID-19 Intervention Timeline in Canada | CIHI. [https://www.cihi.ca/en/covid-19-intervention-timeline-in-](https://www.cihi.ca/en/covid-19-intervention-timeline-in-canada)  
4 canada (accessed 29 Jun 2022).  
5  
6 26 Xie Y, Al-Aly Z. Risks and burdens of incident diabetes in long COVID: a cohort study. *The Lancet Diabetes &*  
7 *Endocrinology* 2022;**10**:311–21. doi:10.1016/S2213-8587(22)00044-4  
8  
9  
10  
11

## 12 Figure Legends

13  
14 **Figure 1.** Claims-based incidence of dementia in Ontario, Canada between 2015-2021, by data source

15  
16  
17 **Figure 2.** Claims-based incidence of dementia in Ontario, Canada between 2015-2021, by sex, age, and community  
18 size.  
19  
20  
21  
22  
23  
24  
25  
26  
27  
28  
29  
30  
31  
32  
33  
34  
35  
36  
37  
38  
39  
40  
41  
42  
43  
44  
45  
46  
47  
48  
49  
50  
51  
52  
53  
54  
55  
56  
57  
58  
59  
60

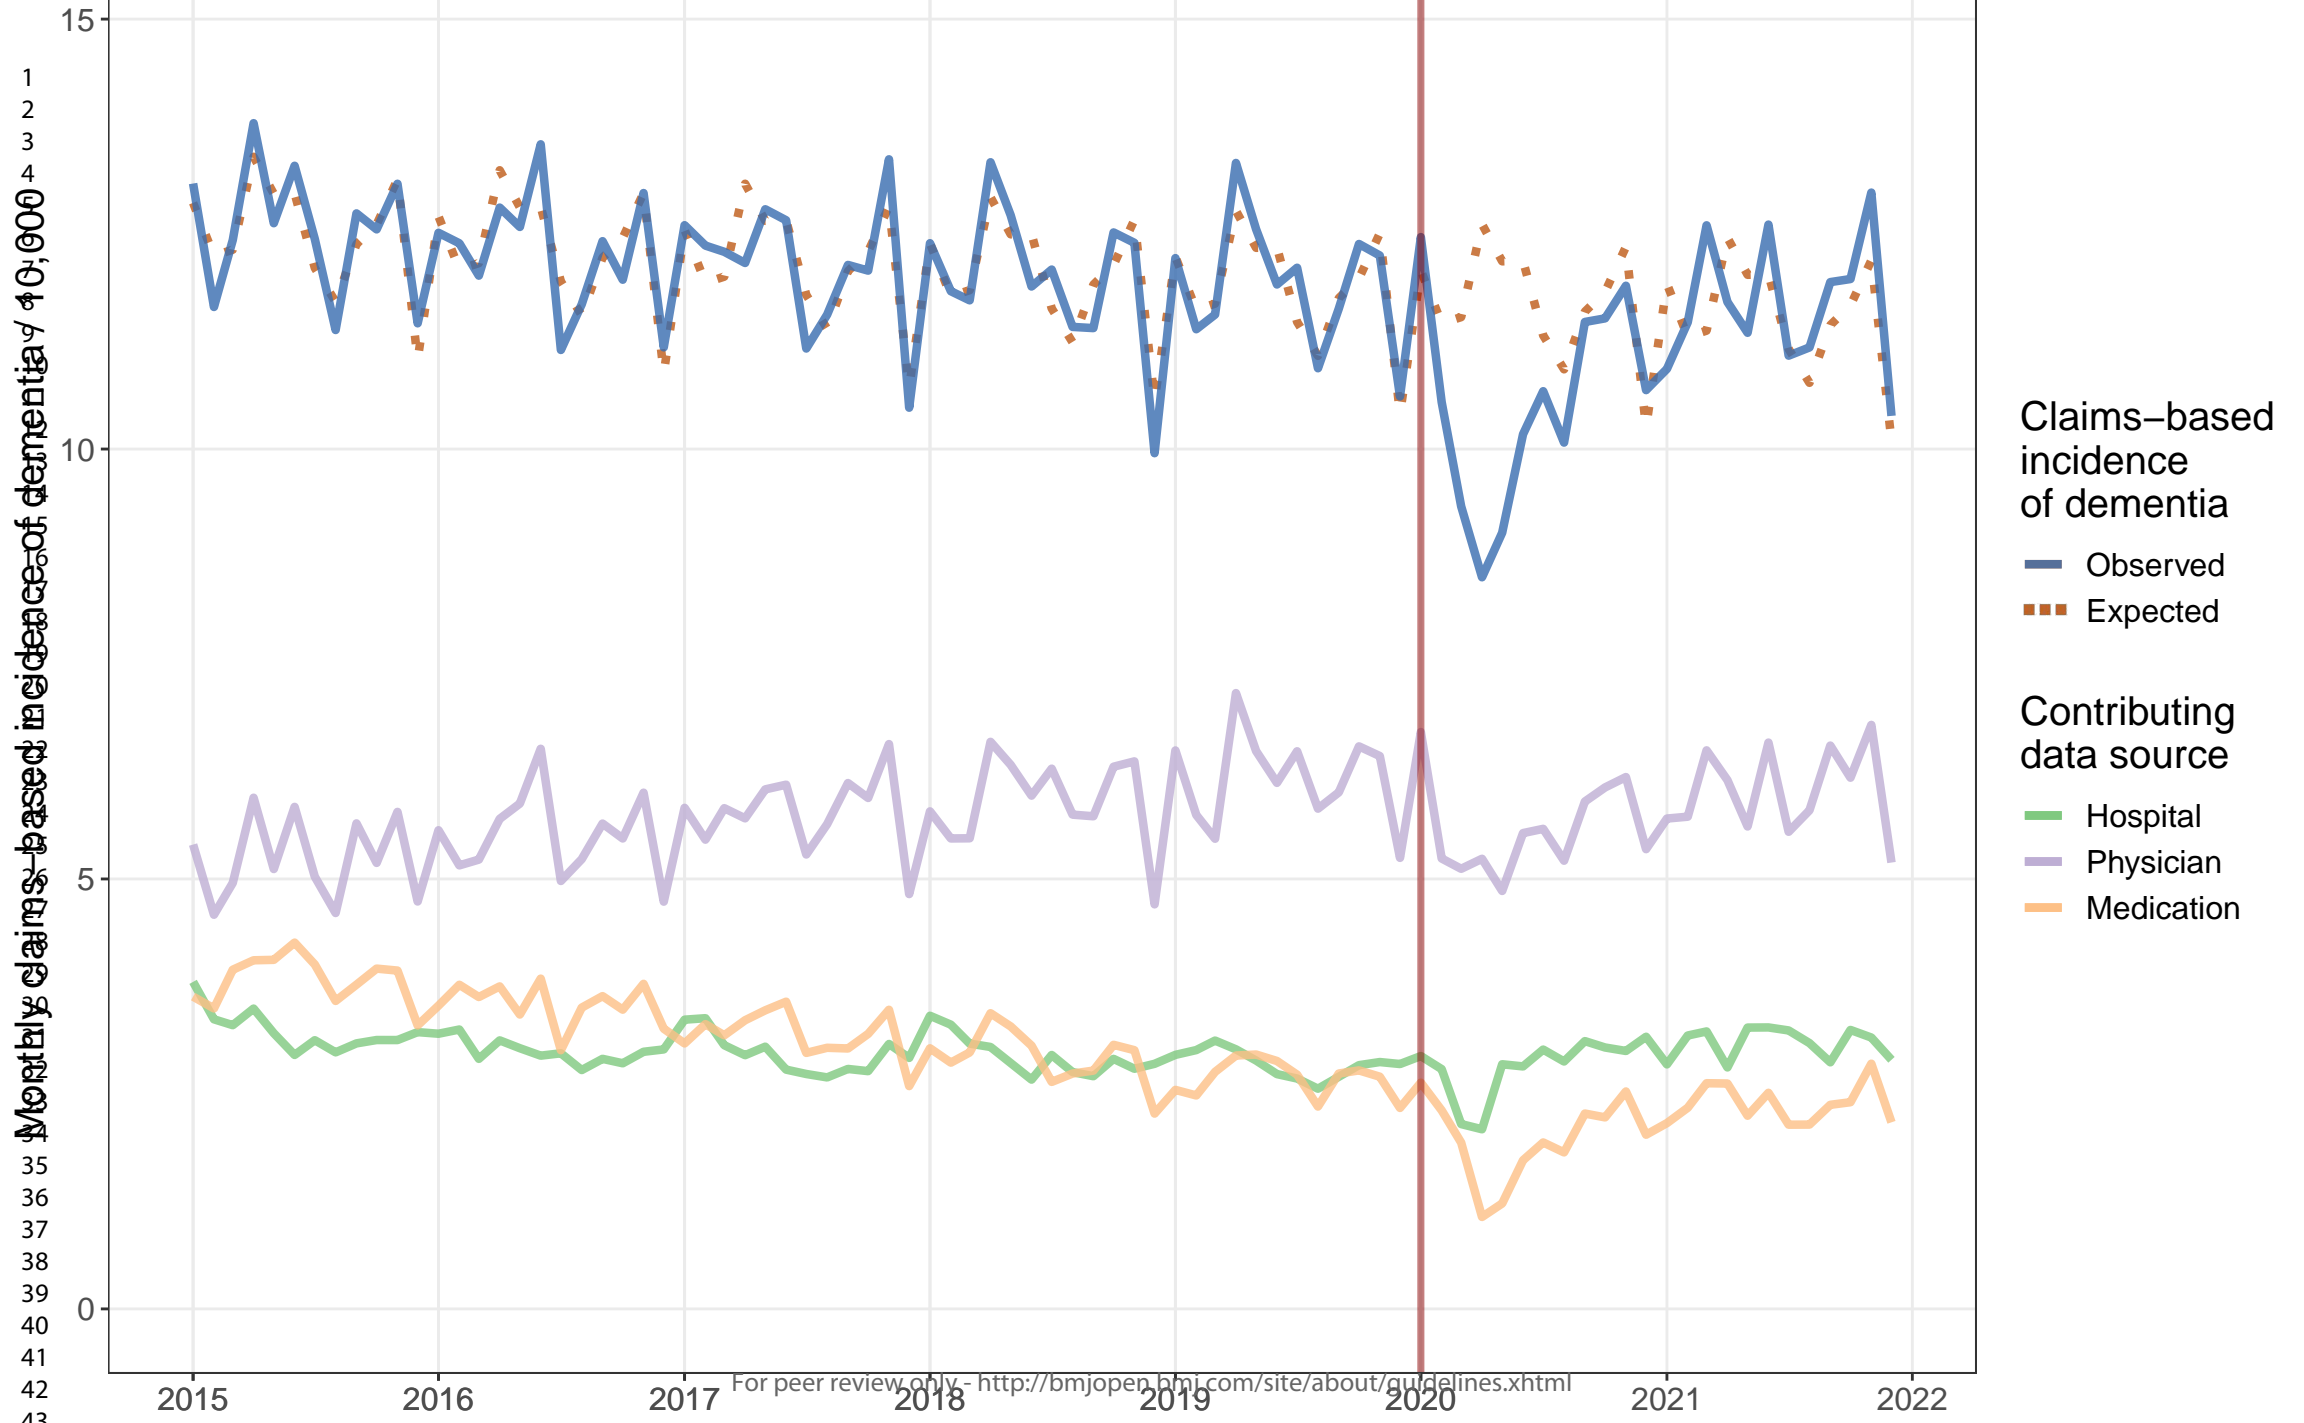

1  
2  
3  
4  
5  
6  
7  
8  
9  
10  
11  
12  
13  
14  
15  
16  
17  
18  
19  
20  
21  
22  
23  
24  
25  
26  
27  
28  
29  
30  
31  
32  
33  
34  
35  
36  
37  
38  
39  
40  
41  
42  
43  
44

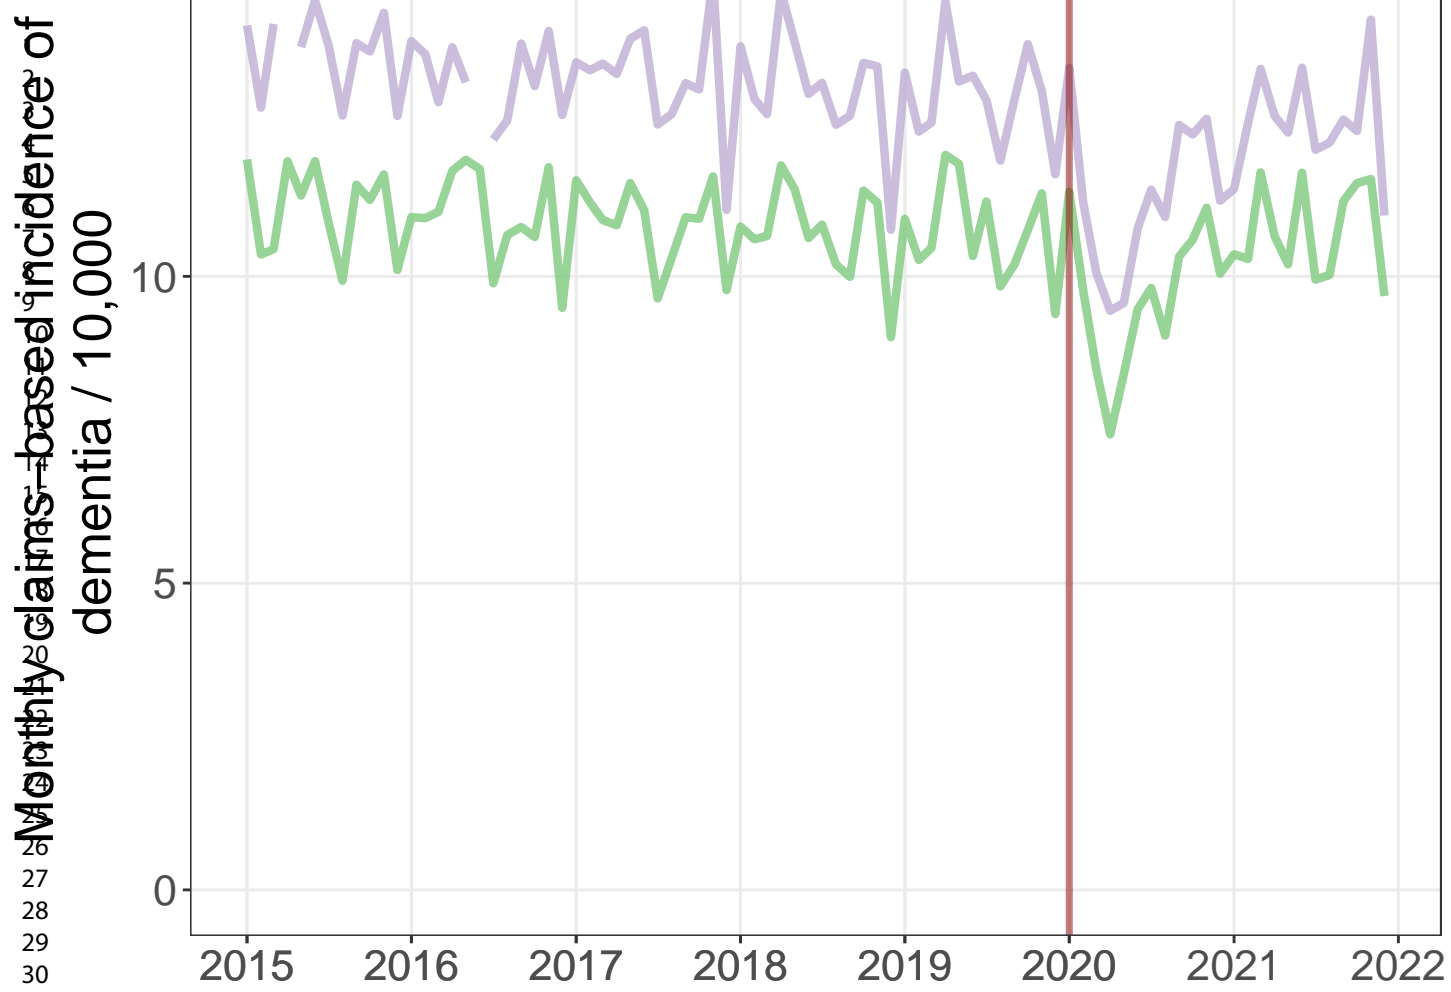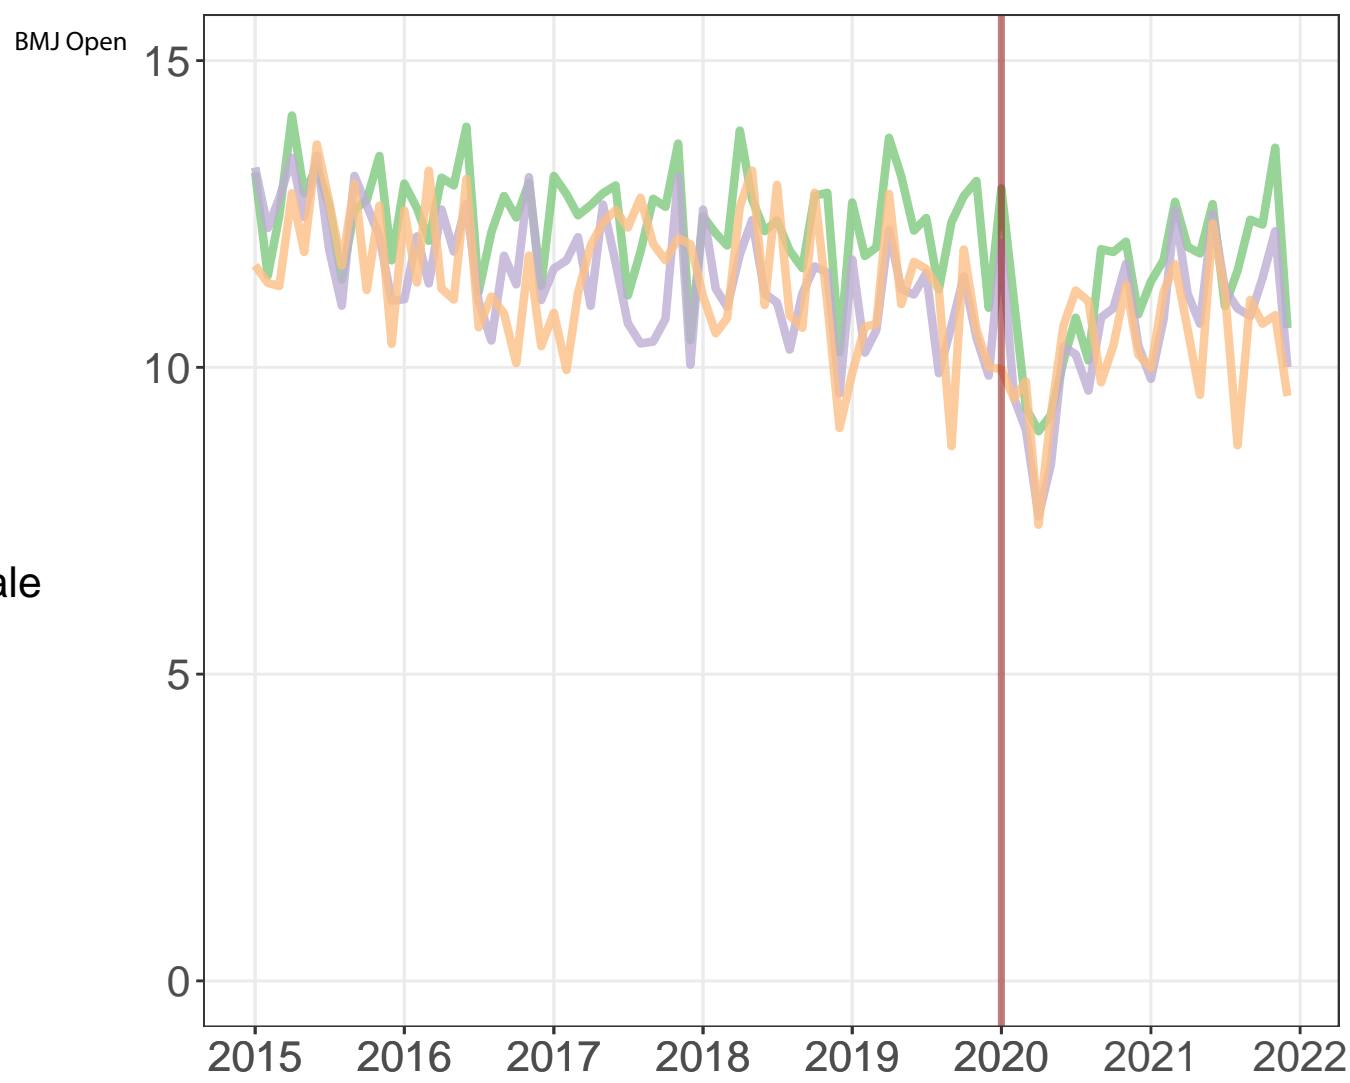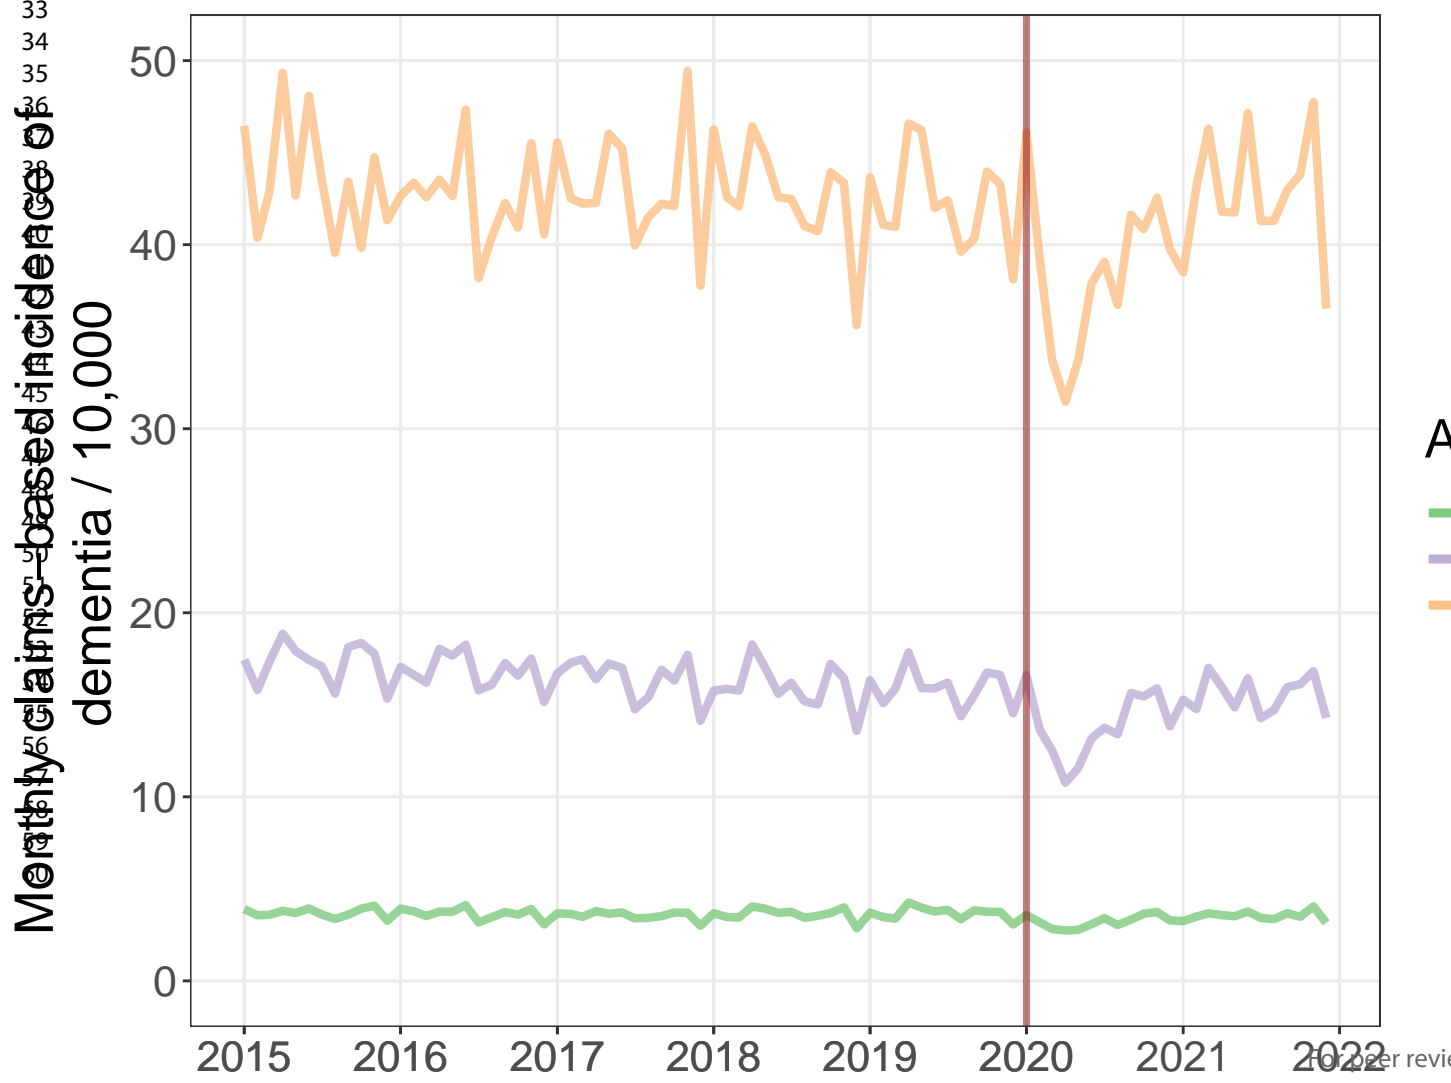

view only

**eTable 1: ICD-10-ca codes and drug identification numbers (DIN) used in dementia case ascertainment**

| ICD-10-CA                  | Drug Identification numbers (DIN)                                                                                                                                                                                                                                                                                                                                                                                                                                                                                                                                                                                                                                                                                                                                                                                                                                                                                                                                                                                                                                                                                                                                                                                                                                                                                                                                                                                                                                                                                                                                                                                                                                                                                                                                                                                                                                                                                                                                                                                                                                                                                                                                                                  |
|----------------------------|----------------------------------------------------------------------------------------------------------------------------------------------------------------------------------------------------------------------------------------------------------------------------------------------------------------------------------------------------------------------------------------------------------------------------------------------------------------------------------------------------------------------------------------------------------------------------------------------------------------------------------------------------------------------------------------------------------------------------------------------------------------------------------------------------------------------------------------------------------------------------------------------------------------------------------------------------------------------------------------------------------------------------------------------------------------------------------------------------------------------------------------------------------------------------------------------------------------------------------------------------------------------------------------------------------------------------------------------------------------------------------------------------------------------------------------------------------------------------------------------------------------------------------------------------------------------------------------------------------------------------------------------------------------------------------------------------------------------------------------------------------------------------------------------------------------------------------------------------------------------------------------------------------------------------------------------------------------------------------------------------------------------------------------------------------------------------------------------------------------------------------------------------------------------------------------------------|
| G30, F00,<br>F01, F02, F03 | 02232043,02232044,02242115,02242116,02242117,02242118,02244298,02244299,<br>02244300,02245240,02260638,02266717,02266725,02266733,02269457,02269465,<br>02270773,02270781,02270803,02293021,02293048,02293056,02302845,02302853,<br>02305984,02305992,02306018,02306026,02306034,02306042,02306050,02306069,<br>02307685,02307693,02307707,02307715,02308169,02308177,02308185,02308193,<br>02311283,02311291,02311305,02311313,02316943,02316951,02316978,02320908,<br>02321130,02321599,02321602,02322331,02322358,02324059,02324067,02324563,<br>02324571,02324598,02324601,02328666,02328682,02332809,02332817,02332825,<br>02332833,02333376,02333384,02333392,02336715,02336723,02336731,02336758,<br>02339439,02339447,02339455,02340607,02340615,02344807,02348950,02349116,<br>02359472,02359480,02362260,02362279,02366487,02367688,02367696,02375532,<br>02375729,02375737,02375745,02375753,02377950,02377969,02377977,02381508,<br>02381516,02382830,02392283,02392291,02392305,02395584,02395592,02397595,<br>02397609,02397617,02397625,02398370,02398389,02398397,02398885,02398893,<br>02400561,02400588,02401614,02401622,02401630,02401649,02402092,02402106,<br>02402645,02402653,02404419,02404427,02406985,02406993,02407000,02407019,<br>02408600,02408619,02409887,02409895,02412853,02412861,02412918,02412934,<br>02413671,02413698,02416417,02416425,02416573,02416581,02416603,02416948,<br>02416956,02416999,02417006,02417014,02417022,02419238,02419246,02419254,<br>02419866,02419874,02420597,02420600,02420821,02420848,02420856,02421364,<br>02421453,02421461,02425157,02425165,02425173,02425343,02425351,02425742,<br>02426293,02426307,02426846,02426854,02426943,02426951,02427273,02427567,<br>02427575,02427583,02427591,02428482,02428490,02430371,02432684,02432692,<br>02432803,02439557,02439565,02443015,02443023,02443031,02443082,02446049,<br>02446669,02446677,02447002,02447010,02383896,02383888,02386011,02386003,<br>02386046,02386038,02423537,02423529,02423421,02423413,02305976,02312492,<br>02312506,02312514,02312522,02308622,02308630,02308649,02308657,02295245,<br>02295229,02295237,02244302,02260611,02376334,02467453,02467461 |

**eTable 2.** Observed and expected claims-based diabetes incidence with relative and absolute differences, Jan 2020 to Dec 2021, Ontario, Canada

| Month  | Observed incidence | Expected incidence | Relative difference | Absolute difference in cases <sup>1,2</sup> | Cumulative difference in cases since Jan 2020 | Cumulative difference in months of expected cases <sup>3</sup> |
|--------|--------------------|--------------------|---------------------|---------------------------------------------|-----------------------------------------------|----------------------------------------------------------------|
| Jan-20 | 11.7               | 10.5               | 11%                 | 256                                         | 256                                           | 0.10                                                           |
| Feb-20 | 11.2               | 10.8               | 3%                  | 84                                          | 339                                           | 0.13                                                           |
| Mar-20 | 10.0               | 11.6               | -13%                | -347                                        | -8                                            | 0.00                                                           |
| Apr-20 | 6.2                | 12.5               | -50%                | -1413                                       | -1421                                         | -0.56                                                          |
| May-20 | 7.0                | 13.0               | -46%                | -1348                                       | -2769                                         | -1.09                                                          |
| Jun-20 | 9.5                | 12.5               | -24%                | -679                                        | -3448                                         | -1.36                                                          |
| Jul-20 | 9.5                | 10.9               | -13%                | -310                                        | -3758                                         | -1.48                                                          |
| Aug-20 | 9.1                | 10.4               | -13%                | -299                                        | -4057                                         | -1.60                                                          |
| Sep-20 | 11.4               | 11.5               | -1%                 | -38                                         | -4094                                         | -1.61                                                          |
| Oct-20 | 12.1               | 12.0               | 1%                  | 33                                          | -4062                                         | -1.60                                                          |
| Nov-20 | 13.0               | 12.4               | 5%                  | 154                                         | -3907                                         | -1.54                                                          |
| Dec-20 | 11.3               | 9.9                | 14%                 | 326                                         | -3581                                         | -1.41                                                          |
| Jan-21 | 10.5               | 10.5               | 0%                  | -1                                          | -3582                                         | -1.41                                                          |
| Feb-21 | 12.2               | 10.8               | 13%                 | 330                                         | -3253                                         | -1.28                                                          |
| Mar-21 | 14.9               | 11.5               | 29%                 | 784                                         | -2469                                         | -0.97                                                          |
| Apr-21 | 13.2               | 12.4               | 6%                  | 182                                         | -2287                                         | -0.90                                                          |
| May-21 | 13.1               | 12.9               | 1%                  | 30                                          | -2257                                         | -0.89                                                          |
| Jun-21 | 15.6               | 12.5               | 25%                 | 733                                         | -1524                                         | -0.60                                                          |
| Jul-21 | 12.8               | 10.8               | 18%                 | 459                                         | -1065                                         | -0.42                                                          |
| Aug-21 | 12.5               | 10.4               | 20%                 | 490                                         | -575                                          | -0.23                                                          |
| Sep-21 | 14.2               | 11.5               | 24%                 | 638                                         | 63                                            | 0.02                                                           |
| Oct-21 | 14.5               | 11.9               | 22%                 | 611                                         | 674                                           | 0.27                                                           |
| Nov-21 | 17.1               | 12.3               | 38%                 | 1117                                        | 1791                                          | 0.71                                                           |
| Dec-21 | 13.5               | 9.9                | 37%                 | 864                                         | 2655                                          | 1.05                                                           |

1. Calculated as difference between observed and expected incidence multiplied by population at risk of dementia, rounded to whole number
2. Rounded to whole number
3. Based on monthly average of new ascertainment in 2019

STROBE Statement—Checklist of items that should be included in reports of *cohort studies*

|                           | Item No | Recommendation                                                                                                                                                                                                                                                                                                         | Page No              |
|---------------------------|---------|------------------------------------------------------------------------------------------------------------------------------------------------------------------------------------------------------------------------------------------------------------------------------------------------------------------------|----------------------|
| <b>Title and abstract</b> | 1       | (a) Indicate the study's design with a commonly used term in the title or the abstract                                                                                                                                                                                                                                 | 2                    |
|                           |         | (b) Provide in the abstract an informative and balanced summary of what was done and what was found                                                                                                                                                                                                                    | 2                    |
| <b>Introduction</b>       |         |                                                                                                                                                                                                                                                                                                                        |                      |
| Background/rationale      | 2       | Explain the scientific background and rationale for the investigation being reported                                                                                                                                                                                                                                   | 3                    |
| Objectives                | 3       | State specific objectives, including any prespecified hypotheses                                                                                                                                                                                                                                                       | 3                    |
| <b>Methods</b>            |         |                                                                                                                                                                                                                                                                                                                        |                      |
| Study design              | 4       | Present key elements of study design early in the paper                                                                                                                                                                                                                                                                | 4                    |
| Setting                   | 5       | Describe the setting, locations, and relevant dates, including periods of recruitment, exposure, follow-up, and data collection                                                                                                                                                                                        | 4,5                  |
| Participants              | 6       | (a) Give the eligibility criteria, and the sources and methods of selection of participants. Describe methods of follow-up<br>(b) For matched studies, give matching criteria and number of exposed and unexposed                                                                                                      | 4                    |
| Variables                 | 7       | Clearly define all outcomes, exposures, predictors, potential confounders, and effect modifiers. Give diagnostic criteria, if applicable                                                                                                                                                                               | 5                    |
| Data sources/measurement  | 8*      | For each variable of interest, give sources of data and details of methods of assessment (measurement). Describe comparability of assessment methods if there is more than one group                                                                                                                                   | 4                    |
| Bias                      | 9       | Describe any efforts to address potential sources of bias                                                                                                                                                                                                                                                              | 6                    |
| Study size                | 10      | Explain how the study size was arrived at                                                                                                                                                                                                                                                                              | 5                    |
| Quantitative variables    | 11      | Explain how quantitative variables were handled in the analyses. If applicable, describe which groupings were chosen and why                                                                                                                                                                                           | 5,6                  |
| Statistical methods       | 12      | (a) Describe all statistical methods, including those used to control for confounding<br>(b) Describe any methods used to examine subgroups and interactions<br>(c) Explain how missing data were addressed<br>(d) If applicable, explain how loss to follow-up was addressed<br>(e) Describe any sensitivity analyses | 5,6                  |
| <b>Results</b>            |         |                                                                                                                                                                                                                                                                                                                        |                      |
| Participants              | 13*     | (a) Report numbers of individuals at each stage of study—eg numbers potentially eligible, examined for eligibility, confirmed eligible, included in the study, completing follow-up, and analysed<br>(b) Give reasons for non-participation at each stage<br>(c) Consider use of a flow diagram                        | 7                    |
| Descriptive data          | 14*     | (a) Give characteristics of study participants (eg demographic, clinical, social) and information on exposures and potential confounders<br>(b) Indicate number of participants with missing data for each variable of interest<br>(c) Summarise follow-up time (eg, average and total amount)                         | NA - aggregated data |
| Outcome data              | 15*     | Report numbers of outcome events or summary measures over time                                                                                                                                                                                                                                                         | 7, Table 1           |



|    |                          |    |                                                                                                                                                                                                              |                    |
|----|--------------------------|----|--------------------------------------------------------------------------------------------------------------------------------------------------------------------------------------------------------------|--------------------|
| 1  | Main results             | 16 | (a) Give unadjusted estimates and, if applicable, confounder-adjusted estimates and their precision (eg, 95% confidence interval). Make clear which confounders were adjusted for and why they were included | 7, Tables, Figures |
| 2  |                          |    |                                                                                                                                                                                                              |                    |
| 3  |                          |    | (b) Report category boundaries when continuous variables were categorized                                                                                                                                    |                    |
| 4  |                          |    | (c) If relevant, consider translating estimates of relative risk into absolute risk for a meaningful time period                                                                                             |                    |
| 5  | Other analyses           | 17 | Report other analyses done—eg analyses of subgroups and interactions, and sensitivity analyses                                                                                                               | 10                 |
| 6  |                          |    |                                                                                                                                                                                                              |                    |
| 7  |                          |    |                                                                                                                                                                                                              |                    |
| 8  |                          |    |                                                                                                                                                                                                              |                    |
| 9  |                          |    |                                                                                                                                                                                                              |                    |
| 10 |                          |    |                                                                                                                                                                                                              |                    |
| 11 | <b>Discussion</b>        |    |                                                                                                                                                                                                              |                    |
| 12 | Key results              | 18 | Summarise key results with reference to study objectives                                                                                                                                                     | 11                 |
| 13 | Limitations              | 19 | Discuss limitations of the study, taking into account sources of potential bias or imprecision. Discuss both direction and magnitude of any potential bias                                                   | 13                 |
| 14 |                          |    |                                                                                                                                                                                                              |                    |
| 15 | Interpretation           | 20 | Give a cautious overall interpretation of results considering objectives, limitations, multiplicity of analyses, results from similar studies, and other relevant evidence                                   | 11,12              |
| 16 |                          |    |                                                                                                                                                                                                              |                    |
| 17 | Generalisability         | 21 | Discuss the generalisability (external validity) of the study results                                                                                                                                        | 13                 |
| 18 |                          |    |                                                                                                                                                                                                              |                    |
| 19 |                          |    |                                                                                                                                                                                                              |                    |
| 20 |                          |    |                                                                                                                                                                                                              |                    |
| 21 | <b>Other information</b> |    |                                                                                                                                                                                                              |                    |
| 22 | Funding                  | 22 | Give the source of funding and the role of the funders for the present study and, if applicable, for the original study on which the present article is based                                                | 14                 |
| 23 |                          |    |                                                                                                                                                                                                              |                    |
| 24 |                          |    |                                                                                                                                                                                                              |                    |

25  
26 \*Give information separately for exposed and unexposed groups.

27  
28 **Note:** An Explanation and Elaboration article discusses each checklist item and gives methodological background and  
29 published examples of transparent reporting. The STROBE checklist is best used in conjunction with this article (freely  
30 available on the Web sites of PLoS Medicine at <http://www.plosmedicine.org/>, Annals of Internal Medicine at  
31 <http://www.annals.org/>, and Epidemiology at <http://www.epidem.com/>). Information on the STROBE Initiative is  
32 available at <http://www.strobe-statement.org>.  
33  
34  
35  
36  
37  
38  
39  
40  
41  
42  
43  
44  
45  
46  
47  
48  
49  
50  
51  
52  
53  
54  
55  
56  
57  
58  
59  
60

# BMJ Open

## Examining the immediate and on-going impact of the COVID-19 pandemic on population-based estimates of dementia: a population-based time series analysis in Ontario, Canada

|                                 |                                                                                                                                                                                                                                                                                                                                                                                                                                                                                                                                                                                                                           |
|---------------------------------|---------------------------------------------------------------------------------------------------------------------------------------------------------------------------------------------------------------------------------------------------------------------------------------------------------------------------------------------------------------------------------------------------------------------------------------------------------------------------------------------------------------------------------------------------------------------------------------------------------------------------|
| Journal:                        | <i>BMJ Open</i>                                                                                                                                                                                                                                                                                                                                                                                                                                                                                                                                                                                                           |
| Manuscript ID                   | bmjopen-2022-067689.R1                                                                                                                                                                                                                                                                                                                                                                                                                                                                                                                                                                                                    |
| Article Type:                   | Original research                                                                                                                                                                                                                                                                                                                                                                                                                                                                                                                                                                                                         |
| Date Submitted by the Author:   | 25-Nov-2022                                                                                                                                                                                                                                                                                                                                                                                                                                                                                                                                                                                                               |
| Complete List of Authors:       | Jones, Aaron; Hamilton, Department of Health Research Methods, Evidence, and Impact; ICES<br>Bronskill, Susan; ICES<br>Maclagan, Laura; ICES<br>Jaakkimainen, R. Liisa; University of Toronto, Department of Family and Community Medicine; Sunnybrook Health Sciences Centre, Department of Family and Community Medicine<br>Kirkwood, David; ICES<br>Mayhew, Alexandra; McMaster University, Health Research Methods, Evidence, and Impact<br>Costa, Andrew P ; Hamilton, Department of Health Research Methods, Evidence, and Impact<br>Griffith, Lauren; McMaster University, Clinical Epidemiology and Biostatistics |
| <b>Primary Subject Heading</b>: | Health services research                                                                                                                                                                                                                                                                                                                                                                                                                                                                                                                                                                                                  |
| Secondary Subject Heading:      | Geriatric medicine, Public health                                                                                                                                                                                                                                                                                                                                                                                                                                                                                                                                                                                         |
| Keywords:                       | COVID-19, Dementia < NEUROLOGY, Public health < INFECTIOUS DISEASES, GERIATRIC MEDICINE                                                                                                                                                                                                                                                                                                                                                                                                                                                                                                                                   |
|                                 |                                                                                                                                                                                                                                                                                                                                                                                                                                                                                                                                                                                                                           |

SCHOLARONE™  
Manuscripts

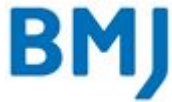

I, the Submitting Author has the right to grant and does grant on behalf of all authors of the Work (as defined in the below author licence), an exclusive licence and/or a non-exclusive licence for contributions from authors who are: i) UK Crown employees; ii) where BMJ has agreed a CC-BY licence shall apply, and/or iii) in accordance with the terms applicable for US Federal Government officers or employees acting as part of their official duties; on a worldwide, perpetual, irrevocable, royalty-free basis to BMJ Publishing Group Ltd ("BMJ") its licensees and where the relevant Journal is co-owned by BMJ to the co-owners of the Journal, to publish the Work in this journal and any other BMJ products and to exploit all rights, as set out in our [licence](#).

The Submitting Author accepts and understands that any supply made under these terms is made by BMJ to the Submitting Author unless you are acting as an employee on behalf of your employer or a postgraduate student of an affiliated institution which is paying any applicable article publishing charge ("APC") for Open Access articles. Where the Submitting Author wishes to make the Work available on an Open Access basis (and intends to pay the relevant APC), the terms of reuse of such Open Access shall be governed by a Creative Commons licence – details of these licences and which [Creative Commons](#) licence will apply to this Work are set out in our licence referred to above.

Other than as permitted in any relevant BMJ Author's Self Archiving Policies, I confirm this Work has not been accepted for publication elsewhere, is not being considered for publication elsewhere and does not duplicate material already published. I confirm all authors consent to publication of this Work and authorise the granting of this licence.

1  
2 Examining the immediate and on-going impact of the COVID-19 pandemic on population-based  
3 estimates of dementia: a population-based time series analysis in Ontario, Canada  
4  
5

6 Aaron Jones, PhD<sup>1,2</sup>

7 Susan E. Bronskill, PhD<sup>2,3,4</sup>

8 Laura C. Maclagan, MSc<sup>2</sup>

9 R. Liisa Jaakkimainen, MD<sup>2,4,5</sup>

10 David Kirkwood, MSc<sup>2</sup>

11 Alexandra Mayhew, PhD<sup>1</sup>

12 Andrew P. Costa, PhD<sup>1,2\*</sup>

13 Lauren E. Griffith, PhD<sup>1\*</sup>

- 14  
15  
16  
17 1. Department of Health Research Methods, Evidence, and Impact, McMaster University, Hamilton,  
18 Ontario, Canada  
19 2. ICES, Toronto, Ontario, Canada  
20 3. Dalla Lana School of Public Health, University of Toronto, Toronto, Ontario, Canada  
21 4. Institute of Health Policy, Management & Evaluation, University of Toronto, Toronto, Ontario, Canada  
22 5. Department of Family and Community Medicine, University of Toronto, Toronto, Ontario, Canada  
23  
24

25 \* AP and LG are co-senior authors

26  
27 **Corresponding Author**

28 Dr. Aaron Jones

29 Assistant Professor

30 Department of Health Research Methods Evidence and Impact

31 McMaster University

32 1280 Main Street W, Hamilton, Ontario, Canada L8S 4L8

33 e: [jonesa13@mcmaster.ca](mailto:jonesa13@mcmaster.ca)

34 p: 416-912-9276

35  
36  
37 **Word count:** 3,054  
38  
39  
40  
41  
42  
43  
44  
45  
46  
47  
48  
49  
50  
51  
52  
53  
54  
55  
56  
57  
58  
59  
60

## ABSTRACT

### Objectives

Population-based chronic disease surveillance systems were likely disrupted by the COVID-19 pandemic. The objective of this study was to examine the immediate and on-going impact of COVID-19 pandemic on the claims-based incidence of dementia.

### Methods

We conducted a population-based time series analysis from January 2015 to December 2021 in Ontario, Canada. We calculated the monthly claims-based incidence of dementia using a validated case ascertainment algorithm drawing from routinely-collected health administrative data. We used autoregressive linear models to compare the claims-based incidence of dementia during the COVID-19 period (2020-2021) to the expected incidence had the pandemic not occurred, controlling for seasonality and secular trends. We examined incidence by source of ascertainment and across strata of sex, age, community size, and number of health conditions.

### Results

The monthly claims-based incidence of dementia dropped from a 2019 average of 11.9 per 10,000 to 8.5 per 10,000 in April 2020 (32.6% lower than expected). Incidence returned to expected levels by late 2020. Across the COVID-19 period there were a cumulative 2,990 (95% CI [2,109-3,704]) fewer cases of dementia observed than expected, equivalent to 1.05 months of new cases. Despite the overall recovery, ascertainment rates continued to be lower than expected among individuals aged 65-74 years and in large urban areas. Ascertainment rates were higher than expected in hospital and among individuals with 11 or more health conditions.

### Conclusions

The claims-based incidence of dementia recovered to expected levels by late 2020, suggesting minimal long-term changes to population-based dementia surveillance. Continued monitoring of claims-based incidence is necessary to determine whether the lower than expected incidence among individuals 65-74 and in large urban areas, and higher than expected incidence among individuals with 11 or more health conditions, is transitory.

**Keywords:** COVID-19, dementia, administrative data, chronic disease surveillance

### Strengths and Limitations

- The population-based design enables examination of the research question over a large and representative population.
- The validated case ascertainment algorithm used in the study draws on health system encounters from multiple sectors.
- However, chronic disease ascertainment dates derived from health administrative data may not align with the date of clinical diagnosis.

## INTRODUCTION

Dementia case ascertainment algorithms based on health administrative data are regularly used in population-based research and chronic disease surveillance.[1–3] By tracking the incidence and prevalence of diseases over time, chronic disease surveillance systems provide critical information for public health planning and evaluation.[4] In the absence of national registries or screening programs, administrative databases are a vital source of data on the epidemiology of chronic diseases.[5] Claims-based case ascertainment methods for dementia combine information gathered from routinely-collected health records, including physician encounters, hospital admissions, and dementia-specific medication use, to identify individuals who are likely to have been diagnosed with dementia. The performance of these algorithms varies by setting and jurisdiction, but they typically achieve high positive predictive value with reasonable sensitivity.[6] While these algorithms have clear utility, there are also known challenges as the methods depend on interactions with the health system which can be used to identify dementia diagnoses.[7] Accurate ascertainment requires equitable and consistent access to health services and recording of relevant diagnoses.

The COVID-19 pandemic had a wide-ranging impact on health service use, including reductions in care volumes across settings[8], rapid uptake of virtual care[9], and changes in the most common reasons for which health care was sought.[10] Examining changes in the claims-based incidence of dementia will yield insight into the the disruptions of the pandemic on physician diagnoses of dementia. The extent and longevity of any impact of the COVID-19 pandemic on claims-based incidence of dementia has important implications for the future use of population-based dementia estimates. The objective of this study was to examine how the claims-based incidence of dementia changed across the COVID-19 period in Ontario, Canada, both immediately at the start of the pandemic, as well as over time. We examined differences in the claims-based incidence across contributing data sources (physician encounters, hospital admissions, medications) and across sociodemographic strata of age, sex, community size, and health conditions.

## METHODS

## Setting and Study Design

We conducted a time series analysis using population-based health administrative datasets in Ontario, Canada. Ontario has a population of approximately 15 million individuals, including more than 2 million over the age of 65 years.[11] Ontario's health system includes publicly-funded universal health insurance for medically necessary services, including physician care, hospital-based care, and medication coverage for individuals aged 65 years and older. According to Canadian guidelines[12], routine cognitive screening of asymptomatic individuals for mild cognitive impairment or dementia is not recommended, but the assessment of cognition, activities of daily living, and neuropsychiatric symptoms is indicated when there are clinically significant concerns for a cognitive disorder. In Ontario there are no incentives for clinicians to screen for dementia such as exist for certain other chronic diseases [13].

## Population

Our population was an open cohort of older adults 65 years at risk of dementia. We included older adults living in both community and congregate care settings.

## Dementia case ascertainment

We used the dementia case definition from the Canadian Chronic Disease Surveillance System.[14] The validated algorithm identifies individuals likely diagnosed with dementia using administrative records from physician encounters, hospital admissions, and use of dementia-specific medications. Individuals are considered to have been likely diagnosed with dementia when they meet any one of the following criteria: 1.) three separate physician encounters with a dementia ICD-9/10 code, with at least 30 days separating each encounter; 2.) a single hospital admission with a dementia ICD-9/10 code; or 3.) a single dispensation of a dementia-specific medication (i.e. cholinesterase inhibitors). The ascertainment date is identified as the earliest of the hospital admission date, the medication dispensation date, or the last date of the physician encounter sequence. In Ontario, the algorithm was found to outperform other claims-based formulations and

1  
2 achieved a sensitivity of 79.3%, a specificity of 99.1%, and a positive predictive value of 80.4%.[15] A full  
3  
4 definition of the algorithm including all ICD-9/10 codes and Anatomical Therapeutic Chemical codes is listed in  
5  
6 Supplemental Table 1. The lookback window in the administrative data to exclude individuals with prevalent  
7  
8 dementia from the incidence calculation extended back to 1996.  
9

## 10 11 **Data sources**

12  
13  
14 Diagnosis codes from physician encounters and hospital admissions were extracted from the Ontario  
15  
16 Health Insurance Plan database and the Canadian Institute for Health Information's Discharge Abstract  
17  
18 Database, respectively. Medication use was captured from the Ontario Drug Benefit database. Ontario's  
19  
20 insurable population was identified using the Registered Persons Database. These datasets were linked using  
21  
22 unique encoded identifiers and analyzed at ICES. ICES is an independent, non-profit research institute whose  
23  
24 legal status under Ontario's health information privacy law allows it to collect and analyze health care and  
25  
26 demographic data, without consent, for health system evaluation and improvement.  
27  
28  
29

## 30 31 **Claims-based incidence of dementia**

32  
33  
34 We calculated the monthly claims-based incidence of dementia per 10,000 individuals among older  
35  
36 adults (65+ years) in Ontario at risk of dementia between January 2015 to December 2021. The incidence was  
37  
38 calculated as the number of new ascertainties in a month, divided by the population at risk of dementia at  
39  
40 the start of the month, divided by the count of days in the month, multiplied by 30.  
41  
42

## 43 44 **Statistical analysis**

45  
46 We fit autoregressive linear regression models to the monthly claims-based dementia incidence[16].  
47  
48 Seasonality was controlled for using an indicator variable for each month[17] and long-term trend via a linear  
49  
50 term on the number of months since beginning of the time series. The model was fit on the pre-COVID-19  
51  
52 pandemic period (2015 to 2019). This model was used to generate what the expected incidence of claims-  
53  
54 based dementia would have been during the COVID-19 period (2020-2021) had the pandemic not occurred.  
55  
56  
57  
58



1  
2 We calculated relative and absolute differences between observed and expected claims-based dementia  
3  
4 incidence. We characterized the initial decline in claims-based incidence by comparing the observed and  
5  
6 expected incidence at the month of the lowest observed incidence in 2020. We calculated the difference  
7  
8 between the count of observed and expected dementia case ascertainment by applying the difference  
9  
10 between the between the observed and expected incidences to the population at risk each month. We  
11  
12 examined cumulative differences in the count of observed and expected dementia case ascertainment within  
13  
14 calendar years and across the entire COVID-19 period. We constructed 95% confidence intervals around the  
15  
16 cumulative differences in case ascertainment during the COVID-19 period using a 5000-replicate block  
17  
18 bootstrap[18] with a block size of 3 months. To facilitate comparison across strata of different sizes, we  
19  
20 expressed the cumulative difference in case ascertainment in terms of the number of months of new  
21  
22 ascertainment they represent based on 2019 figures.  
23  
24  
25

26  
27 We stratified the main analysis by data source (physician encounters, hospital admissions,  
28  
29 medications) to identify whether certain sources were more strongly affected by the pandemic. We  
30  
31 additionally stratified by age (65-74,75-84,85+), sex (male vs. female), community size (large urban, small  
32  
33 urban, rural), and count of health conditions (0-5, 6-10, 11+) to explore differential effects across  
34  
35 sociodemographic strata. Community size was defined using the Rurality Index of Ontario[19]. Health  
36  
37 condition count was defined using the Canadian Institute for Health Information Population Health  
38  
39 Grouper[20], which includes 226 health conditions that can be ascertained via administrative data sources. All  
40  
41 analyses were performed using R version 4.0.3.[21]  
42  
43  
44

#### 45 **Sensitivity analysis**

46  
47  
48 To examine whether the changes in claims-based incidence were related to a shifting population  
49  
50 composition, we repeated the main analyses using incidence rates that were standardized to the age-sex  
51  
52 distribution of Ontario on January 2015. We also repeated the main analysis among only the community-  
53  
54  
55  
56  
57  
58  
59  
60

dwelling older adult population to examine to what degree changes were due to the disproportionate impact of the pandemic on long-term care homes.

### Patient and Public Involvement

No patients were involved at the conduct of this study due to limited time and resources. We have invited patients and stakeholders to help us develop and carry out our knowledge dissemination strategy.

## RESULTS

The population of the older adults at risk of dementia varied from 2,030,431 (January 2015) to 2,569,017 (December 2021). The monthly claims-based incidence of dementia declined slightly across the pre-COVID-19 period from an average of 12.5 cases per 10,000 in 2015 to 11.9 cases per 10,000 in 2019. Physician encounters were the most common source of case ascertainment across the entire time series, representing approximately 50% of new cases. Claims-based incidence dropped sharply during the first months of the COVID-19 period reaching a nadir of 8.5 per 1,000 in April 2020 (32.6% less than expected) (Table 1). By late 2020, the observed incidence had returned to the pre-pandemic expected incidence but did not appreciably rebound above expected levels (Figure 1).

**Table 1.** Observed and expected claims-based dementia incidence with relative and absolute differences, Jan 2020 to Dec 2021, Ontario, Canada

| Month  | Observed incidence | Expected incidence | Relative difference | Absolute difference in cases <sup>1,2</sup> | Cumulative difference in cases since Jan 2020 | Cumulative difference in months of expected cases <sup>3</sup> |
|--------|--------------------|--------------------|---------------------|---------------------------------------------|-----------------------------------------------|----------------------------------------------------------------|
| Jan-20 | 12.5               | 12.1               | 3%                  | 95                                          | 95                                            | 0.03                                                           |
| Feb-20 | 10.5               | 11.5               | -8%                 | -225                                        | -130                                          | -0.05                                                          |
| Mar-20 | 9.3                | 11.5               | -19%                | -540                                        | -670                                          | -0.23                                                          |
| Apr-20 | 8.5                | 12.6               | -33%                | -1012                                       | -1682                                         | -0.59                                                          |
| May-20 | 9.0                | 12.2               | -26%                | -781                                        | -2463                                         | -0.86                                                          |
| Jun-20 | 10.2               | 12.2               | -17%                | -501                                        | -2964                                         | -1.04                                                          |
| Jul-20 | 10.7               | 11.3               | -6%                 | -162                                        | -3125                                         | -1.09                                                          |
| Aug-20 | 10.1               | 10.9               | -8%                 | -213                                        | -3338                                         | -1.17                                                          |
| Sep-20 | 11.5               | 11.6               | -1%                 | -30                                         | -3369                                         | -1.18                                                          |
| Oct-20 | 11.5               | 11.8               | -3%                 | -77                                         | -3446                                         | -1.21                                                          |

|    |                                                  |      |      |     |      |                       |       |
|----|--------------------------------------------------|------|------|-----|------|-----------------------|-------|
| 1  |                                                  |      |      |     |      |                       |       |
| 2  | Nov-20                                           | 11.9 | 12.4 | -4% | -114 | -3560                 | -1.25 |
| 3  | Dec-20                                           | 10.7 | 10.3 | 4%  | 110  | -3450                 | -1.21 |
| 4  | Jan-21                                           | 10.9 | 11.9 | -8% | -253 | -3703                 | -1.30 |
| 5  | Feb-21                                           | 11.5 | 11.3 | 1%  | 42   | -3661                 | -1.28 |
| 6  | Mar-21                                           | 12.6 | 11.4 | 11% | 311  | -3350                 | -1.17 |
| 7  | Apr-21                                           | 11.7 | 12.5 | -6% | -191 | -3541                 | -1.24 |
| 8  | May-21                                           | 11.3 | 12.0 | -6% | -174 | -3714                 | -1.30 |
| 9  | Jun-21                                           | 12.6 | 12.0 | 5%  | 148  | -3567                 | -1.25 |
| 10 | Jul-21                                           | 11.1 | 11.2 | -1% | -20  | -3587                 | -1.26 |
| 11 | Aug-21                                           | 11.2 | 10.8 | 4%  | 105  | -3482                 | -1.22 |
| 12 | Sep-21                                           | 11.9 | 11.4 | 4%  | 129  | -3353                 | -1.17 |
| 13 | Oct-21                                           | 12.0 | 11.7 | 3%  | 78   | -3275                 | -1.15 |
| 14 | Nov-21                                           | 13.0 | 12.2 | 6%  | 205  | -3070                 | -1.07 |
| 15 | Dec-21                                           | 10.4 | 10.1 | 3%  | 80   | -2990                 | -1.05 |
| 16 |                                                  |      |      |     |      |                       |       |
| 17 |                                                  |      |      |     |      |                       |       |
| 18 |                                                  |      |      |     |      |                       |       |
| 19 | 2020 Cumulative difference in cases (95%CI)      |      |      |     |      | -3,450 (-3753,-3,078) |       |
| 20 | 2021 Cumulative difference in cases (95%CI)      |      |      |     |      | 460 (49, 957)         |       |
| 21 | 2020-2021 Cumulative difference in cases (95%CI) |      |      |     |      | -2,990 (-3,704-2,109) |       |
| 22 |                                                  |      |      |     |      |                       |       |
| 23 |                                                  |      |      |     |      |                       |       |
| 24 |                                                  |      |      |     |      |                       |       |
| 25 |                                                  |      |      |     |      |                       |       |
| 26 |                                                  |      |      |     |      |                       |       |
| 27 |                                                  |      |      |     |      |                       |       |
| 28 |                                                  |      |      |     |      |                       |       |
| 29 |                                                  |      |      |     |      |                       |       |
| 30 |                                                  |      |      |     |      |                       |       |
| 31 |                                                  |      |      |     |      |                       |       |
| 32 |                                                  |      |      |     |      |                       |       |
| 33 |                                                  |      |      |     |      |                       |       |
| 34 |                                                  |      |      |     |      |                       |       |
| 35 |                                                  |      |      |     |      |                       |       |
| 36 |                                                  |      |      |     |      |                       |       |
| 37 |                                                  |      |      |     |      |                       |       |
| 38 |                                                  |      |      |     |      |                       |       |
| 39 |                                                  |      |      |     |      |                       |       |
| 40 |                                                  |      |      |     |      |                       |       |
| 41 |                                                  |      |      |     |      |                       |       |
| 42 |                                                  |      |      |     |      |                       |       |
| 43 |                                                  |      |      |     |      |                       |       |
| 44 |                                                  |      |      |     |      |                       |       |
| 45 |                                                  |      |      |     |      |                       |       |
| 46 |                                                  |      |      |     |      |                       |       |
| 47 |                                                  |      |      |     |      |                       |       |
| 48 |                                                  |      |      |     |      |                       |       |
| 49 |                                                  |      |      |     |      |                       |       |
| 50 |                                                  |      |      |     |      |                       |       |
| 51 |                                                  |      |      |     |      |                       |       |
| 52 |                                                  |      |      |     |      |                       |       |
| 53 |                                                  |      |      |     |      |                       |       |
| 54 |                                                  |      |      |     |      |                       |       |
| 55 |                                                  |      |      |     |      |                       |       |
| 56 |                                                  |      |      |     |      |                       |       |
| 57 |                                                  |      |      |     |      |                       |       |
| 58 |                                                  |      |      |     |      |                       |       |
| 59 |                                                  |      |      |     |      |                       |       |
| 60 |                                                  |      |      |     |      |                       |       |

1. Calculated as difference between observed and expected incidence multiplied by population at risk of dementia, rounded to whole number
2. Rounded to whole number
3. Based on monthly average of new ascertainties in 2019

Between January 2020 and December 2021, there were a cumulative 2,990 (95% CI: 2,109-3,704) fewer case ascertainties observed than expected, a gap equivalent to 1.05 months of cases based on 2019 averages. The vast majority of the fewer-than-expected ascertainties were accumulated between February 2020 and June 2020. Across 2021 as a whole, there were slightly more cases observed than expected (460 cases (95% CI: 49, 957)). In each of the final five months of the time series, the observed count exceeded the expected count by 3%-6% (Table 1).

All data sources exhibited drops in claims-based incidence during the first months of the pandemic, with medication use demonstrating the largest relative decrease (59.4%) in April 2020, compared to 26.9% for physician encounters, and 27.4% for hospital admissions (Figure 2, Table 2). After the initial decline, ascertainties in the hospital setting recovered the quickest, followed by medication use. Throughout 2021,

observed case ascertainment from physician encounters continued to lag behind expected ascertainment, while observed ascertainment in the other settings exceeded the expected number of cases.

**Table 2.** Changes in the claims-based dementia incidence during the COVID-19 pandemic with cumulative differences between observed and expected cases, by data source, sex, age, community size, and chronic condition count in Ontario, Canada

| Measure                                                                                           | Overall              | Data source          |                      |                      |
|---------------------------------------------------------------------------------------------------|----------------------|----------------------|----------------------|----------------------|
|                                                                                                   |                      | Physician encounters | Hospital admissions  | Medication use       |
| 2019 Average incidence / 10,000                                                                   | 11.9                 | 6.2                  | 2.9                  | 2.7                  |
| 2020 Nadir incidence / 10,000                                                                     | 8.5                  | 4.9                  | 2.1                  | 1.1                  |
| Percent drop in incidence at nadir vs. expected                                                   | 32.6%                | 26.9%                | 27.4%                | 59.4%                |
| 2020 Cumulative difference observed vs. expected cases (in months of new cases) <sup>1</sup>      | -1.21 (-1.32, -1.08) | -1.63 (-1.53, 1.41)  | 0.32 (-0.03, 0.72)   | -1.78 (-2.19, -1.38) |
| 2021 Cumulative difference observed vs. expected cases (in months of new cases) <sup>1</sup>      | 0.16 (0.01, 0.32)    | -1.23 (-1.52, -0.94) | 1.90 (1.43, 2.45)    | 1.51 (0.96, 2.04)    |
| 2020-2021 Cumulative difference observed vs. expected cases (in months of new cases) <sup>1</sup> | -1.05 (-1.31, -0.77) | -2.86 (-3.36, -2.35) | 2.23 (1.38, 3.17)    | -0.27 (-1.23, 0.66)  |
| Measure                                                                                           | Overall              | Sex                  |                      |                      |
|                                                                                                   |                      | Male                 | Female               |                      |
| 2019 Average incidence / 10,000                                                                   | 11.9                 | 10.7                 | 12.9                 |                      |
| 2020 Nadir incidence / 10,000                                                                     | 8.5                  | 7.4                  | 9.4                  |                      |
| Percent drop in incidence at nadir vs. expected                                                   | 32.6%                | 34.6%                | 31.1%                |                      |
| 2020 Cumulative difference observed vs. expected cases (in months of new cases) <sup>1</sup>      | -1.21 (-1.32, -1.08) | -1.06 (-1.23, -0.88) | -1.32 (-1.47, -1.16) |                      |
| 2021 Cumulative difference observed vs. expected cases (in months of new cases) <sup>1</sup>      | 0.16 (0.01, 0.32)    | 0.32 (0.10, 0.55)    | 0.04 (-0.16, 0.26)   |                      |
| 2020-2021 Cumulative difference observed vs. expected cases (in months of new cases) <sup>1</sup> | -1.05 (-1.31, -0.77) | -0.73 (-1.13, -0.33) | -1.28 (-1.63, -0.90) |                      |
| Measure                                                                                           | Overall              | Age                  |                      |                      |
|                                                                                                   |                      | 65-74                | 76-85                | 85+                  |

|    |                                       |                      |                          |                      |                      |
|----|---------------------------------------|----------------------|--------------------------|----------------------|----------------------|
| 1  |                                       |                      |                          |                      |                      |
| 2  | 2019 Average incidence / 10,000       | 11.9                 | 3.6                      | 15.6                 | 48.4                 |
| 3  | 2020 Nadir incidence / 10,000         | 8.5                  | 2.7                      | 10.6                 | 36.0                 |
| 4  | Percent drop in incidence at nadir    |                      |                          |                      |                      |
| 5  | vs. expected                          | 32.6%                | 30.1%                    | 36.0%                | 30.0%                |
| 6  |                                       |                      |                          |                      |                      |
| 7  | 2020 Cumulative difference            |                      |                          |                      |                      |
| 8  | observed vs. expected cases           | -1.21 (-1.32, -1.08) | -1.39 (-1.64, -1.17)     | -1.19 (-1.36, -0.99) | -1.08 (-1.28, -0.89) |
| 9  | (in months of new cases) <sup>1</sup> |                      |                          |                      |                      |
| 10 | 2021 Cumulative difference            |                      |                          |                      |                      |
| 11 | observed vs. expected cases           | 0.16 (0.01, 0.32)    | -0.29 (-0.59, -0.02)     | 0.40 (0.16, 0.65)    | 0.16 (-0.09, 0.41)   |
| 12 | (in months of new cases) <sup>1</sup> |                      |                          |                      |                      |
| 13 | 2020-2021 Cumulative difference       |                      |                          |                      |                      |
| 14 | observed vs. expected cases           | -1.05 (-1.31, -0.77) | -1.67 (-2.26, -1.16)     | -0.49 (-1.20, -0.35) | -0.92 (-1.38, -0.49) |
| 15 | (in months of new cases) <sup>1</sup> |                      |                          |                      |                      |
| 16 |                                       |                      |                          |                      |                      |
| 17 |                                       |                      | <b>Community size</b>    |                      |                      |
| 18 | <b>Measure</b>                        | <b>Overall</b>       | <b>Large Urban</b>       | <b>Small Urban</b>   | <b>Rural</b>         |
| 19 | 2019 Average incidence / 10,000       | 11.9                 | 12.4                     | 10.9                 | 11.0                 |
| 20 | 2020 Nadir incidence / 10,000         | 8.5                  | 8.9                      | 7.7                  | 7.1                  |
| 21 | Percent drop in incidence at nadir    |                      |                          |                      |                      |
| 22 | vs. expected                          | 32.6%                | 32.4%                    | 31.0%                | 38.8%                |
| 23 |                                       |                      |                          |                      |                      |
| 24 | 2020 Cumulative difference            |                      |                          |                      |                      |
| 25 | observed vs. expected cases           | -1.21 (-1.32, -1.08) | -1.46 (-1.25, -1.54)     | -0.53 (-0.24, -0.81) | -0.89 (-1.43, -0.33) |
| 26 | (in months of new cases) <sup>1</sup> |                      |                          |                      |                      |
| 27 | 2021 Cumulative difference            |                      |                          |                      |                      |
| 28 | observed vs. expected cases           | 0.16 (0.01, 0.32)    | -0.20 (-0.36, -0.02)     | 0.94 (0.61, 1.30)    | 0.04 (-0.69, 0.77)   |
| 29 | (in months of new cases) <sup>1</sup> |                      |                          |                      |                      |
| 30 | 2020-2021 Cumulative difference       |                      |                          |                      |                      |
| 31 | observed vs. expected cases           | -1.05 (-1.31, -0.77) | -1.62 (-1.90, -1.26)     | 0.41 (-0.20, 0.90)   | -0.86 (-2.11, 0.44)  |
| 32 | (in months of new cases) <sup>1</sup> |                      |                          |                      |                      |
| 33 |                                       |                      |                          |                      |                      |
| 34 |                                       |                      | <b>Health Conditions</b> |                      |                      |
| 35 |                                       |                      |                          |                      |                      |
| 36 | <b>Measure</b>                        | <b>Overall</b>       | <b>0-5</b>               | <b>6-10</b>          | <b>11+</b>           |
| 37 |                                       |                      |                          |                      |                      |
| 38 | 2019 Average incidence / 10,000       | 11.9                 | 6.5                      | 14.8                 | 42.1                 |
| 39 | 2020 Nadir incidence / 10,000         | 8.5                  | 4.6                      | 10.7                 | 35.7                 |
| 40 | Percent drop in incidence at nadir    |                      |                          |                      |                      |
| 41 | vs. expected                          | 32.6%                | 34.4%                    | 30.9%                | 17.8%                |
| 42 |                                       |                      |                          |                      |                      |
| 43 | 2020 Cumulative difference            |                      |                          |                      |                      |
| 44 | observed vs. expected cases           | -1.21 (-1.32, -1.08) | -1.92 (-2.19, -1.66)     | -0.50 (-0.72, -0.26) | 1.00 (0.76, 1.23)    |
| 45 | (in months of new cases) <sup>1</sup> |                      |                          |                      |                      |
| 46 | 2021 Cumulative difference            |                      |                          |                      |                      |
| 47 | observed vs. expected cases           | 0.16 (0.01, 0.32)    | -0.68 (-0.35, 0.05)      | 1.37 (1.10, 1.66)    | 2.44 (2.14, 2.73)    |
| 48 | (in months of new cases) <sup>1</sup> |                      |                          |                      |                      |
| 49 | 2020-2021 Cumulative difference       |                      |                          |                      |                      |
| 50 | observed vs. expected cases           | -1.05 (-1.31, -0.77) | -2.30 (-2.87, -1.60)     | 0.88 (0.38, 1.40)    | 3.44 (2.90, 3.96)    |
| 51 | (in months of new cases) <sup>1</sup> |                      |                          |                      |                      |
| 52 |                                       |                      |                          |                      |                      |

1. Cumulative difference between observed and expected cases expressed in terms of the number of months of new cases based on 2019 figures

### Analysis across sociodemographic strata

Initial declines in claims-based incidence across sociodemographic strata were broadly similar, with the smallest drop at 30.0% less than expected among individuals 85+ and the largest drop at 38.8% less than expected among individuals living in rural locations (Figure 2, Table 2). Recoveries were uneven however, and ascertainment in 2021 among individuals aged 65-74 and those residing in large urban locations tracked below expected levels, while ascertainment among those in small urban locations tracked significantly higher.

Most differences were evident across strata defined by number of health conditions. The initial drop in the strata of 0-5 conditions was 34.4% compared to only 17.8% in the strata of those with 11+ conditions. Notably, while the claims-based incidence in the 0-5 condition group recovered much more slowly than the overall population, the incidence in the 11+ group exceeded the expected ascertainment counts even in 2020 and ended the 2020-2021 period with an excess of 3.44 months of ascertainment.

### Sensitivity analysis

The standardized claims-based incidence rate remained similar to observed rate across the study period, drifting higher to a maximum difference of 0.18 in March of 2021 (Supplemental Table 2). Repeating the primary analysis using the standardized incidence rate yielded a cumulative difference of 1.04 (0.73, 1.30) months fewer ascertainment than expected, nearly identical to the main analysis (Supplemental Table 3). Including only the community-dwelling population reduced the average 2019 incidence per 10,000 from 12.04 to 10.32. Replicating the primary analysis resulted in a cumulative difference of 0.89 (0.57, 1.23) months fewer ascertainment than expected across the pandemic period, slightly lower than the primary analysis.

## DISCUSSION

1  
2 We found that the claims-based incidence of dementia in Ontario dropped sharply at the start of the  
3  
4 COVID-19 pandemic in 2020. Claims-based incidence returned to expected levels by the end of 2020 but did  
5  
6 not appreciably rebound above the expected levels. As a result, across the pandemic period there have been  
7  
8 significantly fewer dementia ascertainties observed than expected. Although the overall incidence returned  
9  
10 to normal levels, the recovery was uneven. Cases ascertained via physician encounters, among individuals 65-  
11  
12 74 years of age, and in large urban areas have continued to lag expected counts. Cases ascertained in hospital  
13  
14 and among individuals with 11 or more health conditions have exceeded expected counts.  
15  
16  
17

18 The drop in the claims-based incidence of dementia in early 2020 mirrors the reductions in health  
19  
20 service use that occurred in Ontario at the same time across multiple sectors, including outpatient physician  
21  
22 visits, emergency department visits, and hospital admissions.[8,9,22] At the nadir in April 2020,  
23  
24 hospitalizations and emergency department visits were approximately 50% lower than historical levels, while  
25  
26 rates of outpatient physician services dropped by 40%. However, usage rates within all sectors returned to  
27  
28 normal levels by the end of the 2020. The observed claims-based incidence also returned to the expected  
29  
30 incidence along the same timeline, which broadly suggests no major long-term changes to the performance of  
31  
32 the case ascertainment algorithms. A temporary drop in the claims-based incidence due to lockdowns,  
33  
34 avoidance of in-person visits, and reduced access to community-based physician care may amount to a mere  
35  
36 historical anomaly. However, the small, but enduring, ascertainment gap bears continued monitoring.  
37  
38  
39  
40

41 The etiology of the persistent undercount in cases is likely multifactorial in nature. Given how closely  
42  
43 the fall and rise of the claims-based incidence follows the broader rates of health service use, one likely  
44  
45 contributor is change in health-seeking behavior, patient access to health care services, and delivery of health  
46  
47 services during the pandemic and recovery. This is further supported by the observation of larger impacts in  
48  
49 the younger and healthier groups that typically use less care. Younger individuals experienced greater relative  
50  
51 reductions in health service use during the pandemic compared to older individuals and therefore it may take  
52  
53 more time for the ascertainment rates for younger individuals to regain their normal levels[23]. Beyond  
54  
55  
56  
57  
58  
59  
60

1  
2 changes in health service use, another likely contributing factor is higher relative mortality rates among  
3  
4 individuals at higher risk of developing dementia[24]. This effect would be most noticeable among population  
5  
6 with the high COVID-related mortality, such as residents of long-term care homes. A mortality effect likely  
7  
8 explains the differences we observed between the overall population and community-dwelling subset.  
9

10  
11 Notably, we found that ascertainties from physician encounters lagged expected counts throughout  
12  
13 the entire pandemic period, despite the fact that overall physician visit volumes recovered to normal levels in  
14  
15 2020[23]. This may be related to the rapid uptake of virtual care as the challenges of performing cognitive  
16  
17 testing virtually may lead to fewer or delayed diagnoses of dementia as physicians adapt to new tools[25,26].  
18  
19 For example, comorbid sensory impairment is a contraindication for remote cognitive screening[27].  
20  
21 Additionally, virtual care may also be less accessible to older adults living with frailty or without a  
22  
23 caregiver[28]. Finally, ascertainties via physician encounters are more susceptible to disruption as the  
24  
25 algorithm requires a specific number of visits within a specific time frame. An interruption in access may break  
26  
27 the sequence of visits and delay ascertainment. The lower than expected incidence within large urban areas is  
28  
29 at a glance surprising as individuals within these areas typically have the greatest access to health care[29].  
30  
31 However, the shift to virtual visits was most pronounced in urban areas.[9] Additionally, urban areas were  
32  
33 under strict public health measures for longer periods of time and therefore individuals in the these areas may  
34  
35 have experienced longer delays in resuming normal health service use levels[30].  
36  
37  
38  
39  
40

41 While we observed fewer than expected cases within most strata, there were two subgroups for which  
42  
43 we observed higher incidence – hospital ascertainties and individuals with 11 or more health conditions.  
44  
45 The increase in the ascertainties in hospital is concordant with published reports that hospital admission  
46  
47 rates for dementia and delirium increased or held steady during the pandemic even as overall hospitalization  
48  
49 rates declined [2,31–33]. This population with 11 or more health conditions is small, approximately 7% of the  
50  
51 older adult population without dementia, but is highly comorbid, at high risk of developing dementia, and are  
52  
53 frequent users of the health care system[34]. The higher incidence in this population may be partially a result  
54  
55  
56  
57  
58  
59  
60



1  
2 of increased social isolation in those living alone and visitation restrictions in hospitals and congregate care  
3  
4 settings. Conversely, for those living in multigenerational households, the increase in remote work during the  
5  
6 pandemic may have afforded caregivers additional opportunity to observe cognitive or behavioral changes in  
7  
8 older family members, leading them to seek formal evaluation. Additionally there is emerging evidence that  
9  
10 cognitive decline, including increased risk of developing dementia, is a long-term sequelae of COVID-19  
11  
12 infection[35]. Further cohort studies should focus on changes in dementia incidence in this highly co-morbid  
13  
14 population.  
15  
16

17  
18 The unevenness of the rebound in claims-based incidence of dementia across various  
19  
20 sociodemographic strata warrants on-going monitoring to determine whether the incidence eventually reverts  
21  
22 to the long-term averages. Research studies that rely on claims-based dementia ascertainment to generate  
23  
24 cohorts or define outcomes need to carefully consider the impact of the pandemic on their research.  
25  
26 Additionally, health system policymakers should carefully consider the impact of any future public health  
27  
28 restrictions on individuals at elevated risk of developing dementia. In particular, ensuring family members and  
29  
30 caregivers can visit patients in hospital and long-term care homes can reduce the risk of delirium and dementia  
31  
32 associated with increased social isolation. Also, in-person visits healthcare visits for individuals with difficulty  
33  
34 participating in virtual consultations should be preserved to protect access to care and diagnosis. A missed or  
35  
36 delayed diagnosis of dementia reduces the time during which the person living with dementia can maintain  
37  
38 control of decision-making and care planning and delays the initiation of interventions that may slow cognitive  
39  
40 decline[36,37].  
41  
42  
43  
44  
45

#### 46 **Limitations**

47  
48 Case ascertainment via administrative data enables population-based chronic disease surveillance, but  
49  
50 does not perfectly correspond to clinical diagnoses or necessarily represent the experience of the individual.  
51  
52 For example, a physician may communicate a diagnosis to patient without entering it into the administrative  
53  
54 record. In addition, the case detection via administrative requires equitable access to care and thus may  
55  
56  
57  
58  
59  
60

1  
2 underperform among populations with impaired access. Ultimately research using case ascertainment from  
3  
4 administrative data cannot replace traditional cohort studies to capture the patient experience of people living  
5  
6 with dementia. Finally, differences in the severity of COVID-19 pandemic and public health system response  
7  
8 may result in differences in how population-based dementia estimates have changed across jurisdictions.  
9

## 10 11 **Conclusion**

12  
13  
14 Claims-based dementia incidence as estimated from routinely-collected data fell early in the COVID-19  
15  
16 pandemic but returned to expected levels by late 2020. However, as of the end of 2021 there were still  
17  
18 significantly fewer cumulative dementia cases observed than expected across the pandemic period. Rates of  
19  
20 case ascertainment were lower than expected among individuals 65-74 years old and in large urban areas even  
21  
22 after health service use rebounded. Cases ascertained in hospital and among individuals with 11+ health  
23  
24 conditions were higher than expected. Continued population-based monitoring of dementia incidence is  
25  
26 necessary to identify whether these effects are transitory.  
27  
28  
29  
30

## 31 **ETHICS APPROVAL STATEMENT**

32 ICES is a prescribed entity under Ontario's Personal Health Information Protection Act (PHIPA). Section 45 of  
33  
34 PHIPA authorizes ICES to collect personal health information, without consent, for the purpose of analysis or  
35  
36 compiling statistical information with respect to the management of, evaluation or monitoring of, the  
37  
38 allocation of resources to or planning for all or part of the health system. Projects that use data collected by  
39  
40 ICES under section 45 of PHIPA, and use no other data, are exempt from REB review. The use of the data in this  
41  
42 project is authorized under section 45 and approved by ICES' Privacy and Legal Office.

## 43 **DATA SHARING STATEMENT**

44 The dataset from this study is held securely in coded form at ICES. While data sharing agreements prohibit ICES  
45  
46 from making the dataset publicly available, access may be granted to those who meet prespecified criteria for  
47  
48 confidential access, available at [www.ices.on.ca/DAS](http://www.ices.on.ca/DAS). The full dataset creation plan and underlying analytic  
49  
50 code are available from the authors upon request, understanding that the computer programs may rely upon  
51  
52 coding templates or macros that are unique to ICES and are therefore either inaccessible or may require  
53  
54 modification.  
55

## 56 **CONTRIBUTORS**

57  
58 AJ, AC, and LG conceived the work. AJ developed the design and conducted all analyses. DK performed data  
59  
60 curation. AJ wrote the initial draft. AJ, SB, LM, RLJ, DK, AM, AC, and LG contributed to the interpretation of the  
work and revised the work for critical intellectual content.

## COMPETING INTERESTS

None to report

## FUNDING

This study received funding from the Public Health Agency of Canada (2021-HQ-000076). This study was supported by ICES, which is funded by an annual grant from the Ontario Ministry of Health and the Ministry of Long-Term Care.

## DISCLAIMER

Parts of this material are based on data and information compiled and provided by the Ontario Ministry of Health. This document used data adapted from the Statistics Canada Postal Code<sup>OM</sup> Conversion File, which is based on data licensed from Canada Post Corporation, and/or data adapted from the Ontario Ministry of Health Postal Code Conversion File, which contains data copied under license from ©Canada Post Corporation and Statistics Canada. Parts of this material are also based on data and information compiled and provided by the Canadian Institute for Health Information. The analyses, conclusions, opinions, and statements expressed herein are solely those of the authors and do not reflect those of the funding or data sources; no endorsement is intended or should be inferred. We thank IQVIA Solutions Canada Inc for use of their Drug Information File.

## References

- 1 Davis MA, Chang C-H, Simonton S, *et al*. Trends in US Medicare Decedents' Diagnosis of Dementia From 2004 to 2017. *JAMA Health Forum* 2022;**3**:e220346. doi:10.1001/jamahealthforum.2022.0346
- 2 Jones A, Maclagan LC, Watt JA, *et al*. Reasons for repeated emergency department visits among community-dwelling older adults with dementia in Ontario, Canada. *Journal of the American Geriatrics Society* 2022;**n/a**. doi:10.1111/jgs.17726
- 3 Welberry HJ, Brodaty H, Hsu B, *et al*. Measuring dementia incidence within a cohort of 267,153 older Australians using routinely collected linked administrative data. *Sci Rep* 2020;**10**:8781. doi:10.1038/s41598-020-65273-w
- 4 Thacker SB, Stroup DF, Rothenberg RB, *et al*. Public health surveillance for chronic conditions: A scientific basis for decisions. *Statistics in Medicine* 1995;**14**:629–41. doi:10.1002/sim.4780140520
- 5 Lix LM, Yogendran MS, Shaw SY, *et al*. Population-based data sources for chronic disease surveillance. *Chronic Dis Can* 2008;**29**:31–8.
- 6 Wilkinson T, Ly A, Schnier C, *et al*. Identifying dementia cases with routinely collected health data: A systematic review. *Alzheimers Dement* 2018;**14**:1038–51. doi:10.1016/j.jalz.2018.02.016
- 7 Festa N, Price M, Moura LMVR, *et al*. Evaluation of Claims-Based Ascertainment of Alzheimer Disease and Related Dementias Across Health Care Settings. *JAMA Health Forum* 2022;**3**:e220653. doi:10.1001/jamahealthforum.2022.0653

- 1
  - 2
  - 3
  - 4
  - 5
  - 6
  - 7
  - 8 8 Bronskill SE, Maclagan LC, Maxwell CJ, *et al.* Trends in Health Service Use for Canadian Adults With Dementia and Parkinson Disease During the First Wave of the COVID-19 Pandemic. In: *JAMA Health Forum*. American Medical Association 2022. e214599–e214599.
  - 9
  - 10
  - 11
  - 12
  - 13
  - 14
  - 15
  - 16
  - 17
  - 18
  - 19
  - 20
  - 21
  - 22
  - 23
  - 24
  - 25
  - 26
  - 27
  - 28
  - 29
  - 30
  - 31
  - 32
  - 33
  - 34
  - 35
  - 36
  - 37
  - 38
  - 39
  - 40
  - 41
  - 42
  - 43
  - 44
  - 45
  - 46
  - 47
  - 48
  - 49
  - 50
  - 51
  - 52
  - 53
  - 54
  - 55
  - 56
  - 57
  - 58
  - 59
  - 60
- 9 Glazier RH, Green ME, Wu FC, *et al.* Shifts in office and virtual primary care during the early COVID-19 pandemic in Ontario, Canada. *CMAJ* 2021;**193**:E200–10. doi:10.1503/cmaj.202303
- 10 Stephenson E, Butt DA, Gronsbell J, *et al.* Changes in the top 25 reasons for primary care visits during the COVID-19 pandemic in a high-COVID region of Canada. *PLOS ONE* 2021;**16**:e0255992. doi:10.1371/journal.pone.0255992
- 11 Ontario population projections. Ontario.ca. <http://ontario-v2.vpc.ont/page/ontario-population-projections> (accessed 24 Aug 2021).
- 12 Ismail Z, Black SE, Camicioli R, *et al.* Recommendations of the 5th Canadian Consensus Conference on the diagnosis and treatment of dementia. *Alzheimer's & Dementia* 2020;**16**:1182–95. doi:10.1002/alz.12105
- 13 Thavam T, Devlin RA, Thind A, *et al.* The impact of the diabetes management incentive on diabetes-related services: evidence from Ontario, Canada. *Eur J Health Econ* 2020;**21**:1279–93. doi:10.1007/s10198-020-01216-6
- 14 Canada PHA of. The Canadian Chronic Disease Surveillance System – An Overview. 2018. <https://www.canada.ca/en/public-health/services/publications/canadian-chronic-disease-surveillance-system-factsheet.html> (accessed 6 Jun 2022).
- 15 Jaakkimainen RL, Bronskill SE, Tierney MC, *et al.* Identification of Physician-Diagnosed Alzheimer's Disease and Related Dementias in Population-Based Administrative Data: A Validation Study Using Family Physicians' Electronic Medical Records. *J Alzheimers Dis* 2016;**54**:337–49. doi:10.3233/JAD-160105
- 16 Box GEP, Jenkins GM, Reinsel GC. *Time series analysis: forecasting and control*. 3rd ed. Englewood Cliffs, N.J.: : Prentice Hall 1994. <http://www.gbv.de/dms/bowker/toc/9780130607744.pdf> (accessed 17 Nov 2022).
- 17 Bernal JL, Cummins S, Gasparrini A. Interrupted time series regression for the evaluation of public health interventions: a tutorial. *International Journal of Epidemiology* 2017;**46**:348–55. doi:10.1093/ije/dyw098
- 18 Lahiri SN. Theoretical Comparisons of Block Bootstrap Methods. *The Annals of Statistics* 1999;**27**:386–404.
- 19 Kralj B. Measuring Rurality - RIO2008\_BASIC: Methodology and Results. Toronto: : Ontario Medical Association 2009. [https://docplayer.net/91599736-Measuring-rurality-rio2008\\_basic-methodology-and-results.html](https://docplayer.net/91599736-Measuring-rurality-rio2008_basic-methodology-and-results.html) (accessed 20 Apr 2021).
- 20 CIHI's Population Grouping Methodology 1.3 — Overview and Outputs, 2021. :;28.
- 21 R Core Team. R: A language and environment for statistical computing. 2020.
- 22 Axenus M, Schedin-Weiss S, Tjernberg L, *et al.* Changes in dementia diagnoses in Sweden during the COVID-19 pandemic. *BMC Geriatr* 2022;**22**:365. doi:10.1186/s12877-022-03070-y
- 23 COVID-19's impact on physician services | CIHI. <https://www.cihi.ca/en/covid-19-resources/impact-of-covid-19-on-canadas-health-care-systems/physician-services> (accessed 7 Jun 2022).

- 1  
2 24 Wang Y, Li M, Kazis LE, *et al.* Clinical outcomes of COVID-19 infection among patients with Alzheimer's  
3 disease or mild cognitive impairment. *Alzheimers Dement* 2022;**18**:911–23. doi:10.1002/alz.12665  
4
- 5 25 Saxena S, Factora R, Hashmi A, *et al.* Assessing cognition in the era of COVID19: Do we need methods to  
6 assess cognitive function virtually? *Alzheimers Dement* 2021;**17 Suppl 8**:e050074. doi:10.1002/alz.050074  
7
- 8 26 Watt JA, Lane NE, Veroniki AA, *et al.* Diagnostic accuracy of virtual cognitive assessment and testing:  
9 Systematic review and meta-analysis. *Journal of the American Geriatrics Society* 2021;**69**:1429–40.  
10
- 11 27 Geddes MR, O'Connell ME, Fisk JD, *et al.* Remote cognitive and behavioral assessment: Report of the  
12 Alzheimer Society of Canada Task Force on dementia care best practices for COVID-19. *Alzheimers Dement*  
13 (*Amst*) 2020;**12**:e12111. doi:10.1002/dad2.12111  
14
- 15 28 Liu L, Goodarzi Z, Jones A, *et al.* Factors associated with virtual care access in older adults: a cross-sectional  
16 study. *Age Ageing* 2021;**50**:1412–5. doi:10.1093/ageing/afab021  
17
- 18 29 Geographic Variation in the Supply and Distribution of Comprehensive Primary Care Physicians in Ontario,  
19 2014/15. [https://www.ices.on.ca/Publications/Atlases-and-Reports/2017/Geographic-variation-in-](https://www.ices.on.ca/Publications/Atlases-and-Reports/2017/Geographic-variation-in-physician-supply)  
20 [physician-supply](https://www.ices.on.ca/Publications/Atlases-and-Reports/2017/Geographic-variation-in-physician-supply) (accessed 29 Jun 2022).  
21
- 22 30 Canadian Institute for Health Information. COVID-19 Intervention Timeline in Canada | CIHI.  
23 <https://www.cihi.ca/en/covid-19-intervention-timeline-in-canada> (accessed 29 Jun 2022).  
24
- 25 31 Jones A, Mowbray FI, Falk L, *et al.* Variations in long-term care home resident hospitalizations before and  
26 during the COVID-19 pandemic in Ontario. *PLOS ONE* 2022;**17**:e0264240.  
27 doi:10.1371/journal.pone.0264240  
28
- 29 32 Maclagan LC, Wang X, Emdin A, *et al.* Visits to the emergency department by community-dwelling people  
30 with dementia during the first 2 waves of the COVID-19 pandemic in Ontario: a repeated cross-sectional  
31 analysis. *Canadian Medical Association Open Access Journal* 2022;**10**:E610–21.  
32
- 33 33 Canadian Institute for Health Information. COVID-19's effect on hospital care services.  
34 [https://www.cihi.ca/en/covid-19-resources/impact-of-covid-19-on-canadas-health-care-systems/covid-](https://www.cihi.ca/en/covid-19-resources/impact-of-covid-19-on-canadas-health-care-systems/covid-19s-effect-on-hospital)  
35 [19s-effect-on-hospital](https://www.cihi.ca/en/covid-19-resources/impact-of-covid-19-on-canadas-health-care-systems/covid-19s-effect-on-hospital) (accessed 18 Oct 2021).  
36
- 37 34 Weir S, Steffler M, Li Y, *et al.* Use of the Population Grouping Methodology of the Canadian Institute for  
38 Health Information to predict high-cost health system users in Ontario. *CMAJ* 2020;**192**:E907–12.  
39 doi:10.1503/cmaj.191297  
40
- 41 35 Liu Y-H, Chen Y, Wang Q-H, *et al.* One-Year Trajectory of Cognitive Changes in Older Survivors of COVID-19  
42 in Wuhan, China: A Longitudinal Cohort Study. *JAMA Neurology* 2022;**79**:509–17.  
43 doi:10.1001/jamaneurol.2022.0461  
44
- 45 36 Gamble LD, Matthews FE, Jones IR, *et al.* Characteristics of people living with undiagnosed dementia:  
46 findings from the CFAS Wales study. *BMC Geriatrics* 2022;**22**:409. doi:10.1186/s12877-022-03086-4  
47
- 48 37 Bradford A, Kunik ME, Schulz P, *et al.* Missed and Delayed Diagnosis of Dementia in Primary Care:  
49 Prevalence and Contributing Factors. *Alzheimer Dis Assoc Disord* 2009;**23**:306–14.  
50 doi:10.1097/WAD.0b013e3181a6bebc  
51
- 52  
53  
54  
55  
56  
57  
58  
59  
60

## Figure Legends

**Figure 1.** Claims-based incidence of dementia in Ontario, Canada between 2015-2021, by data source

**Figure 2.** Claims-based incidence of dementia in Ontario, Canada between 2015-2021, by sex, age, and community size, and count of health conditions

For peer review only

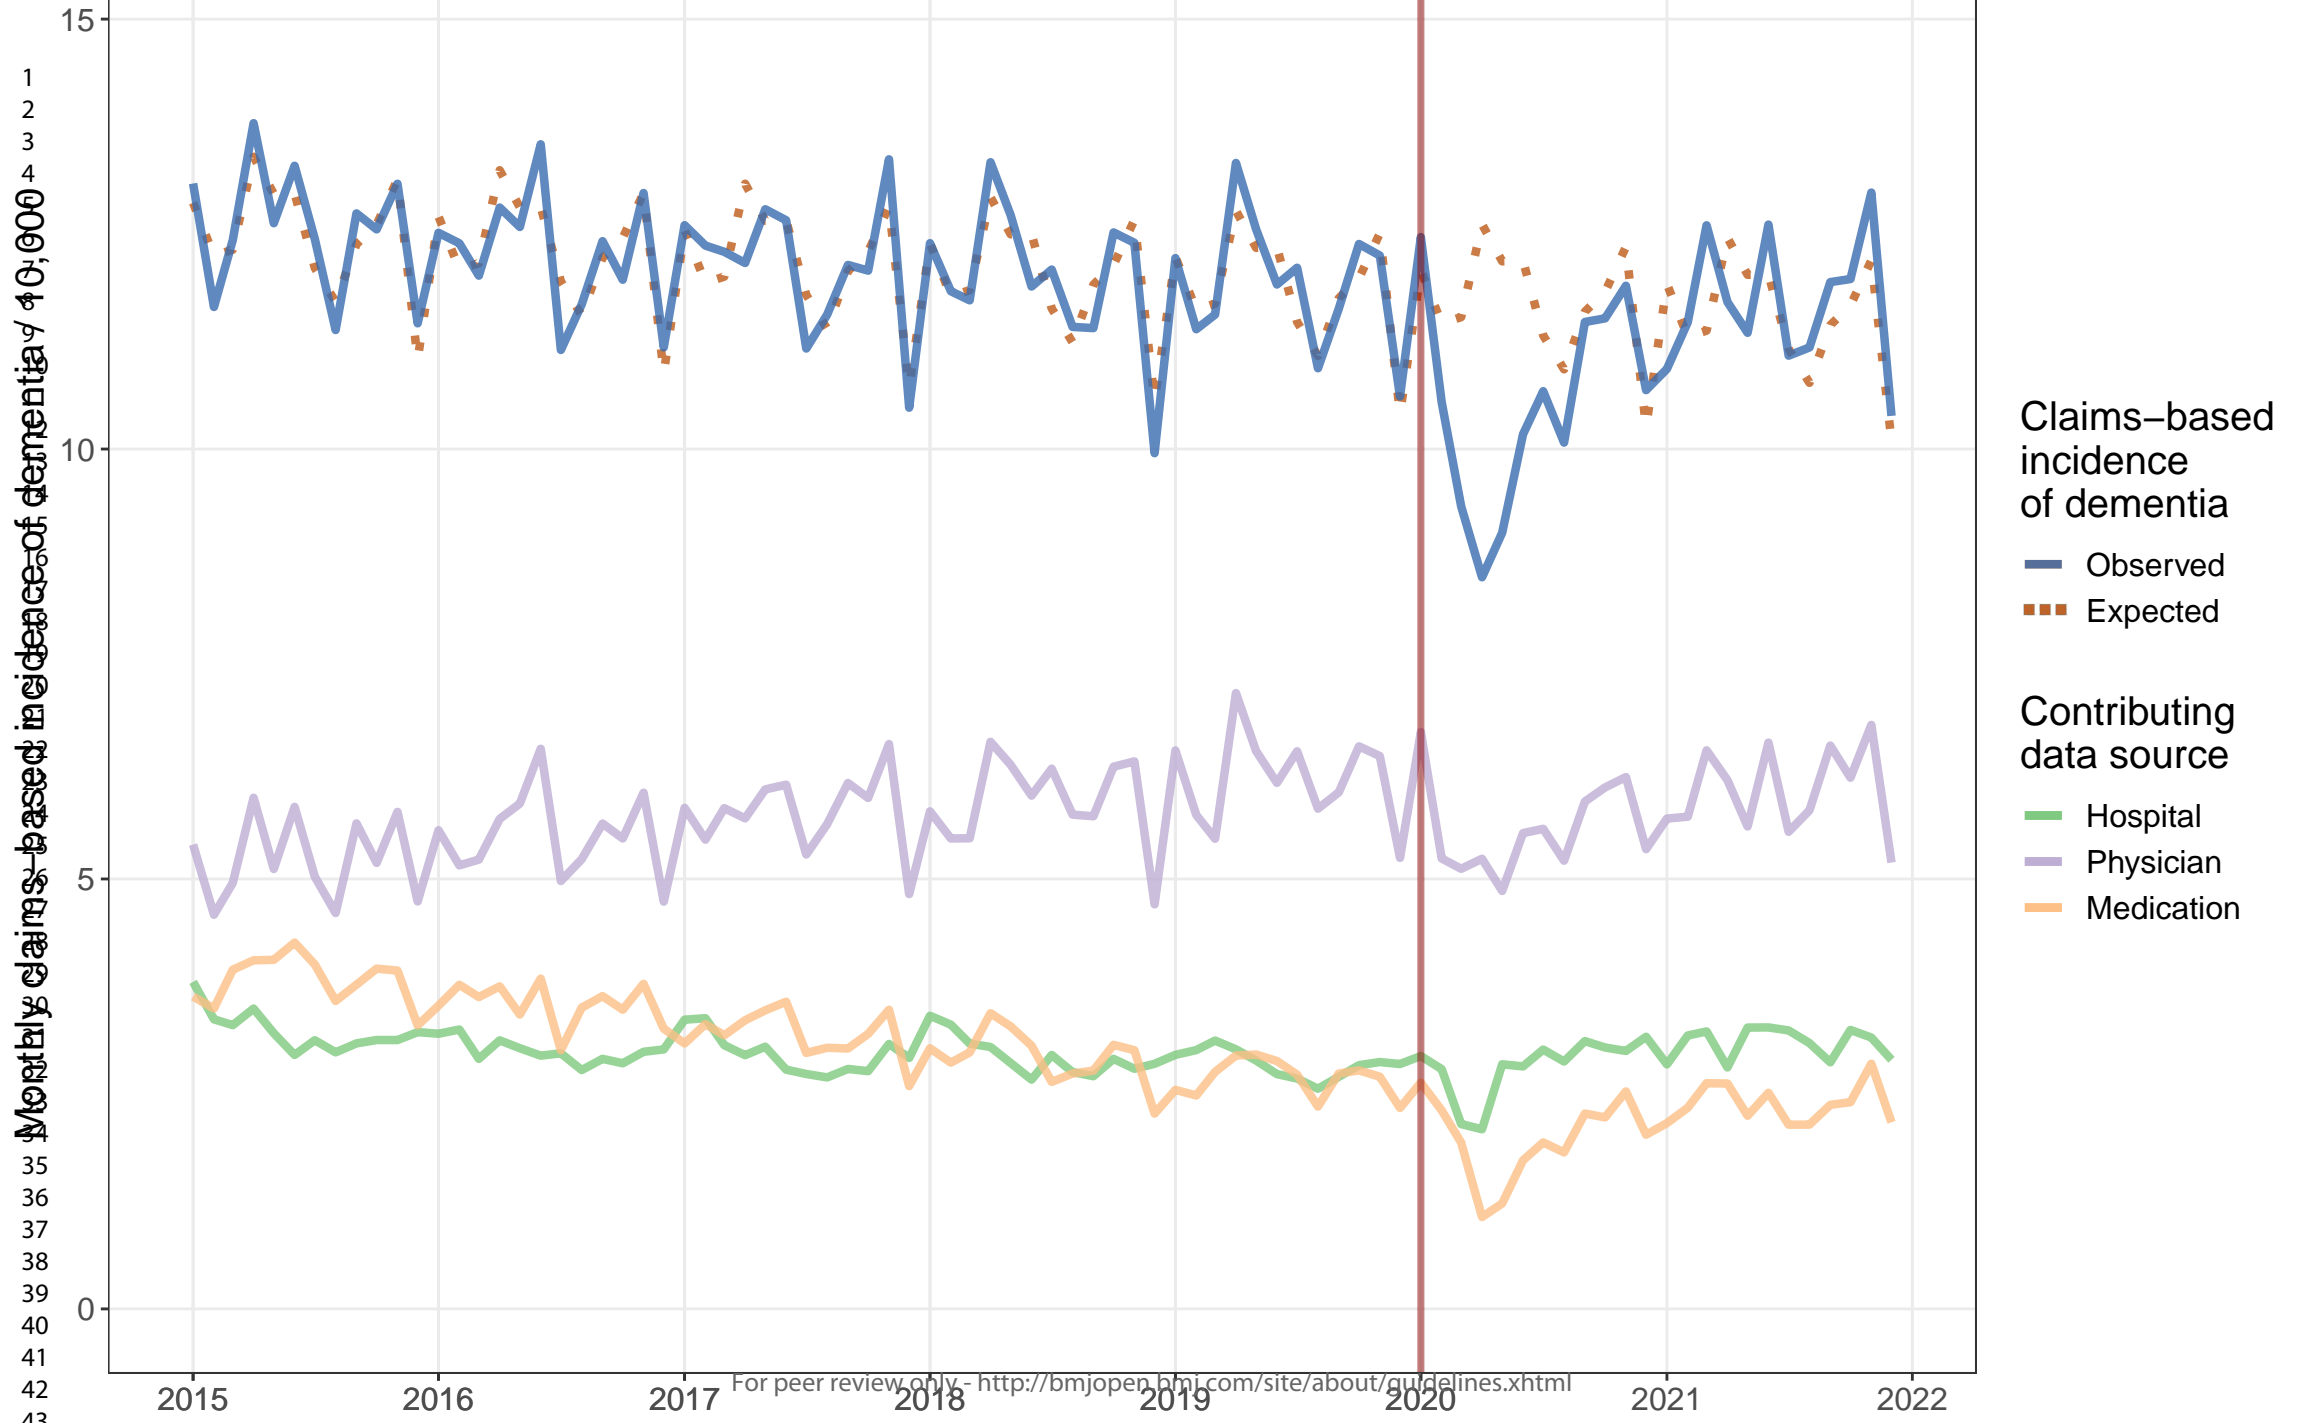

1  
2  
3  
4  
5  
6  
7  
8  
9  
10  
11  
12  
13  
14  
15  
16  
17  
18  
19  
20  
21  
22  
23  
24  
25  
26  
27  
28  
29  
30  
31  
32  
33  
34  
35  
36  
37  
38  
39  
40  
41  
42  
43  
44

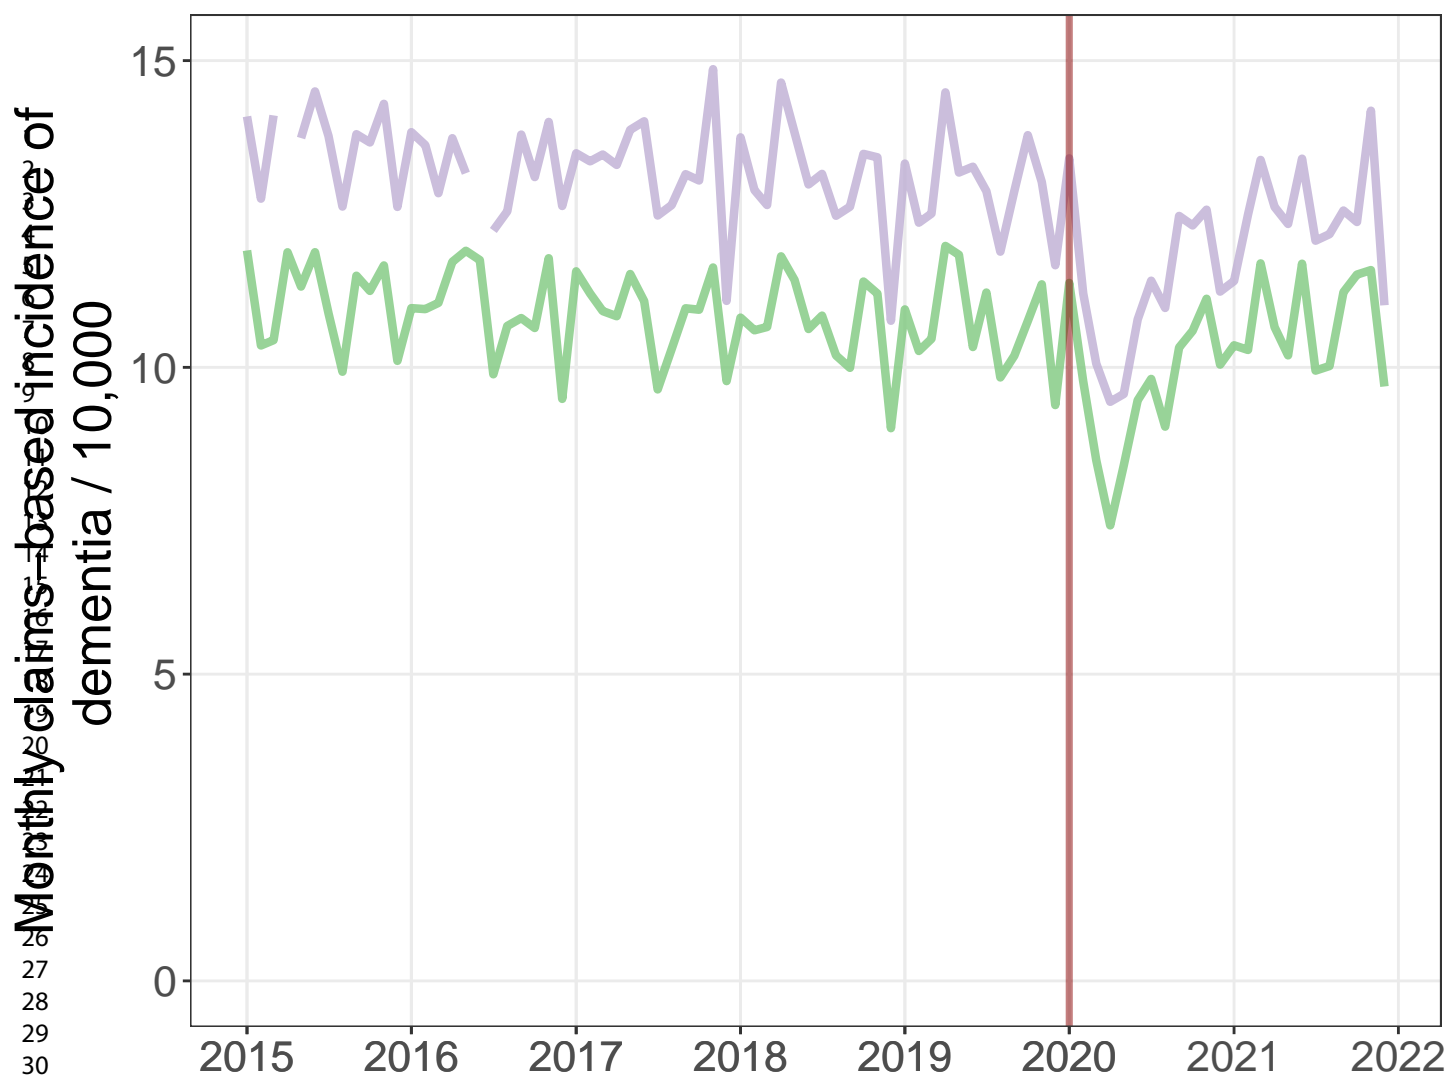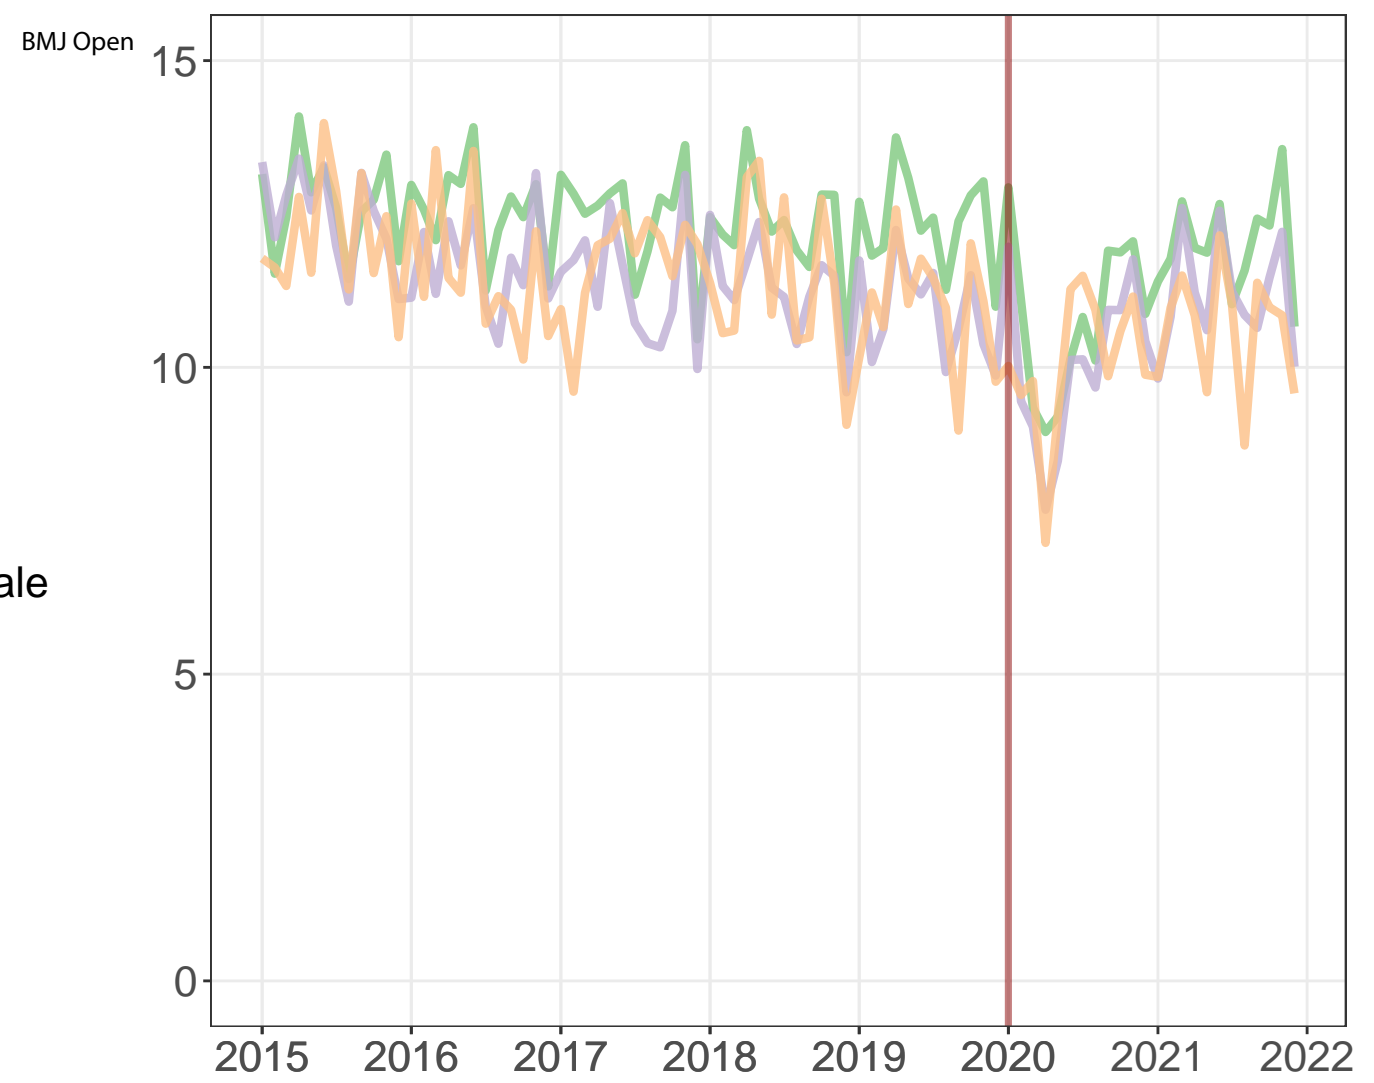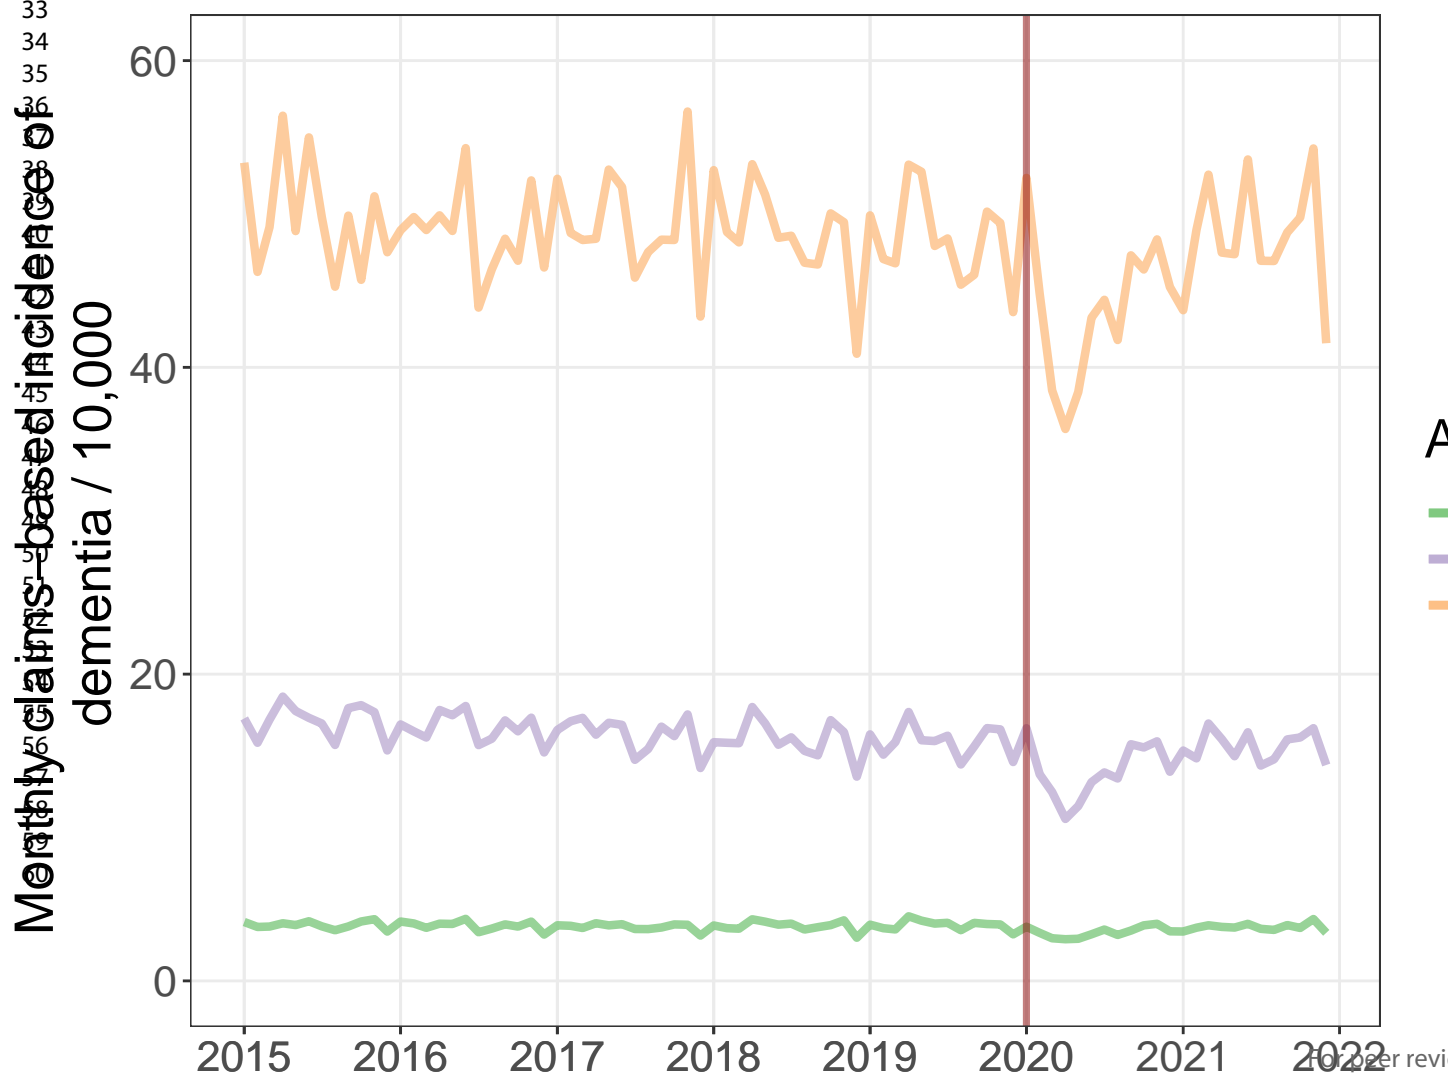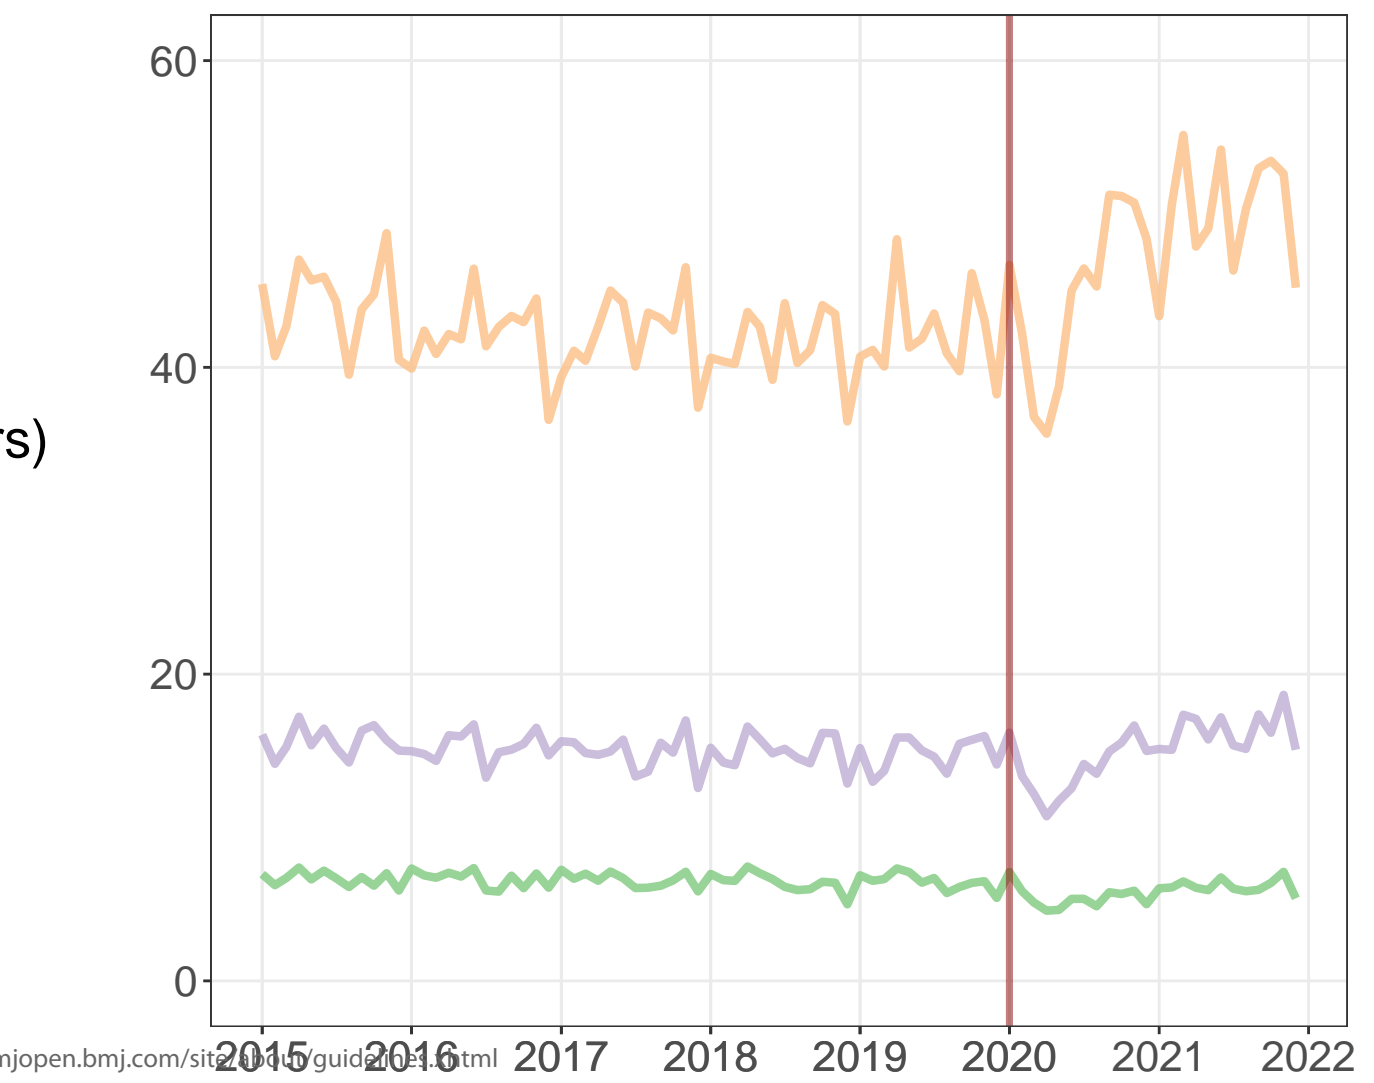



**Supplemental Table 1: ICD-10-ca codes and Anatomical Therapeutic Chemical (ATC) codes used in dementia case ascertainment**

| ICD-10-CA                                             | ATC Codes | Generic Name           |
|-------------------------------------------------------|-----------|------------------------|
| G30 (Alzheimer's disease)                             | N06DA02   | Donepezil              |
| F00 (Dementia in Alzheimer's disease)                 | N06DA03   | Rivastigmine           |
| F01 (Vascular dementia)                               | N06DA04   | Galantamine            |
| F02 (Dementia in other diseases classified elsewhere) | N06DX01   | Memantine <sup>1</sup> |
| F03 (Unspecified dementia)                            |           |                        |

1. Memantine is approved by Health Canada but is not included in the Ontario Drug Benefit Formulary so had no impact on this study

**Supplemental Table 2. Observed and age-sex standardized claims-based dementia incidence Jan 2015 to Dec 2021, Ontario, Canada**

| Month   | Observed incidence | Standardized incidence <sup>1</sup> | Difference |
|---------|--------------------|-------------------------------------|------------|
| Jan2015 | 13.09              | 13.09                               | 0.00       |
| Feb2015 | 11.65              | 11.66                               | 0.00       |
| Mar2015 | 12.43              | 12.44                               | 0.01       |
| Apr2015 | 13.79              | 13.79                               | 0.00       |
| May2015 | 12.63              | 12.64                               | 0.01       |
| Jun2015 | 13.29              | 13.30                               | 0.00       |
| Jul2015 | 12.44              | 12.44                               | 0.00       |
| Aug2015 | 11.38              | 11.39                               | 0.00       |
| Sep2015 | 12.74              | 12.75                               | 0.01       |
| Oct2015 | 12.55              | 12.56                               | 0.00       |
| Nov2015 | 13.09              | 13.08                               | 0.00       |
| Dec2015 | 11.46              | 11.47                               | 0.00       |
| Jan2016 | 12.51              | 12.52                               | 0.00       |
| Feb2016 | 12.39              | 12.40                               | 0.00       |
| Mar2016 | 12.02              | 12.02                               | 0.00       |
| Apr2016 | 12.81              | 12.82                               | 0.01       |
| May2016 | 12.58              | 12.59                               | 0.01       |
| Jun2016 | 13.54              | 13.55                               | 0.01       |
| Jul2016 | 11.15              | 11.16                               | 0.01       |
| Aug2016 | 11.68              | 11.70                               | 0.01       |
| Sep2016 | 12.42              | 12.43                               | 0.02       |
| Oct2016 | 11.97              | 11.98                               | 0.01       |

|    |         |       |       |      |
|----|---------|-------|-------|------|
| 1  |         |       |       |      |
| 2  |         |       |       |      |
| 3  | Nov2016 | 12.98 | 12.99 | 0.01 |
| 4  | Dec2016 | 11.18 | 11.22 | 0.03 |
| 5  | Jan2017 | 12.60 | 12.62 | 0.01 |
| 6  | Feb2017 | 12.37 | 12.40 | 0.03 |
| 7  | Mar2017 | 12.29 | 12.34 | 0.04 |
| 8  | Apr2017 | 12.16 | 12.20 | 0.03 |
| 9  | May2017 | 12.79 | 12.82 | 0.03 |
| 10 | Jun2017 | 12.66 | 12.71 | 0.05 |
| 11 | Jul2017 | 11.17 | 11.21 | 0.05 |
| 12 | Aug2017 | 11.56 | 11.60 | 0.04 |
| 13 | Sep2017 | 12.14 | 12.18 | 0.04 |
| 14 | Oct2017 | 12.07 | 12.11 | 0.04 |
| 15 | Nov2017 | 13.37 | 13.42 | 0.05 |
| 16 | Dec2017 | 10.48 | 10.52 | 0.04 |
| 17 | Jan2018 | 12.39 | 12.44 | 0.04 |
| 18 | Feb2018 | 11.84 | 11.89 | 0.05 |
| 19 | Mar2018 | 11.73 | 11.79 | 0.06 |
| 20 | Apr2018 | 13.34 | 13.41 | 0.08 |
| 21 | May2018 | 12.72 | 12.78 | 0.06 |
| 22 | Jun2018 | 11.89 | 11.96 | 0.06 |
| 23 | Jul2018 | 12.09 | 12.16 | 0.07 |
| 24 | Aug2018 | 11.42 | 11.48 | 0.06 |
| 25 | Sep2018 | 11.41 | 11.47 | 0.06 |
| 26 | Oct2018 | 12.52 | 12.59 | 0.07 |
| 27 | Nov2018 | 12.40 | 12.48 | 0.08 |
| 28 | Dec2018 | 9.95  | 10.02 | 0.07 |
| 29 | Jan2019 | 12.22 | 12.31 | 0.08 |
| 30 | Feb2019 | 11.39 | 11.48 | 0.09 |
| 31 | Mar2019 | 11.56 | 11.65 | 0.09 |
| 32 | Apr2019 | 13.33 | 13.43 | 0.11 |
| 33 | May2019 | 12.56 | 12.63 | 0.07 |
| 34 | Jun2019 | 11.91 | 12.02 | 0.11 |
| 35 | Jul2019 | 12.11 | 12.20 | 0.09 |
| 36 | Aug2019 | 10.94 | 11.03 | 0.09 |
| 37 | Sep2019 | 11.63 | 11.75 | 0.12 |
| 38 | Oct2019 | 12.38 | 12.50 | 0.12 |
| 39 | Nov2019 | 12.25 | 12.37 | 0.12 |
| 40 | Dec2019 | 10.61 | 10.74 | 0.13 |
| 41 | Jan2020 | 12.47 | 12.62 | 0.15 |
| 42 | Feb2020 | 10.55 | 10.66 | 0.12 |
| 43 | Mar2020 | 9.33  | 9.44  | 0.11 |
| 44 | Apr2020 | 8.51  | 8.62  | 0.11 |
| 45 | May2020 | 9.03  | 9.13  | 0.10 |
| 46 | Jun2020 | 10.17 | 10.29 | 0.12 |
| 47 | Jul2020 | 10.67 | 10.79 | 0.12 |
| 48 |         |       |       |      |
| 49 |         |       |       |      |
| 50 |         |       |       |      |
| 51 |         |       |       |      |
| 52 |         |       |       |      |
| 53 |         |       |       |      |
| 54 |         |       |       |      |
| 55 |         |       |       |      |
| 56 |         |       |       |      |
| 57 |         |       |       |      |
| 58 |         |       |       |      |
| 59 |         |       |       |      |
| 60 |         |       |       |      |

1  
2  
3  
4  
5  
6  
7  
8  
9  
10  
11  
12  
13  
14  
15  
16  
17  
18  
19  
20  
21  
22  
23  
24  
25  
26  
27  
28  
29  
30  
31  
32  
33  
34  
35  
36  
37  
38  
39  
40  
41  
42  
43  
44  
45  
46  
47  
48  
49  
50  
51  
52  
53  
54  
55  
56  
57  
58  
59  
60

|         |       |       |      |
|---------|-------|-------|------|
| Aug2020 | 10.07 | 10.19 | 0.11 |
| Sep2020 | 11.48 | 11.62 | 0.14 |
| Oct2020 | 11.52 | 11.66 | 0.14 |
| Nov2020 | 11.90 | 12.05 | 0.15 |
| Dec2020 | 10.69 | 10.82 | 0.13 |
| Jan2021 | 10.92 | 11.06 | 0.14 |
| Feb2021 | 11.47 | 11.63 | 0.16 |
| Mar2021 | 12.60 | 12.78 | 0.18 |
| Apr2021 | 11.71 | 11.88 | 0.17 |
| May2021 | 11.35 | 11.50 | 0.16 |
| Jun2021 | 12.61 | 12.78 | 0.17 |
| Jul2021 | 11.09 | 11.23 | 0.14 |
| Aug2021 | 11.18 | 11.30 | 0.13 |
| Sep2021 | 11.94 | 12.08 | 0.14 |
| Oct2021 | 11.97 | 12.10 | 0.13 |
| Nov2021 | 12.98 | 13.12 | 0.14 |
| Dec2021 | 10.40 | 10.50 | 0.10 |

---

1. Incidence standardized to the age (65-74,75-84,85+) and sex (M/F) group distribution of Ontario as of January 2015.

**Supplemental Table 3.** Changes in the claims-based dementia incidence during the COVID-19 pandemic with cumulative differences between observed and expected cases, overall, using standardized incidence rates, and in the community-dwelling population

| Measure                                                                              | Overall              | Standardized Rates   | Community-dwelling population |
|--------------------------------------------------------------------------------------|----------------------|----------------------|-------------------------------|
| 2019 Average incidence / 10,000                                                      | 11.9                 | 12.0                 | 10.3                          |
| 2020 Nadir incidence / 10,000                                                        | 8.5                  | 8.62                 | 7.04                          |
| Percent drop in incidence at nadir vs. expected                                      | 32.6%                | 32.20%               | 35.20%                        |
| 2020 Cumulative difference observed vs. expected cases (in months of new cases)      | -1.21 (-1.32, -1.08) | -1.19 (-1.31, -1.06) | -1.17 (-1.31, -1.03)          |
| 2021 Cumulative difference observed vs. expected cases (in months of new cases)      | 0.16 (0.01, 0.32)    | 0.16 (0.01, 0.33)    | 0.28 (0.09, 0.46)             |
| 2020-2021 Cumulative difference observed vs. expected cases (in months of new cases) | -1.05 (-1.31, -0.77) | -1.04 (-1.30, -0.73) | -0.89 (-1.23, -0.57)          |

STROBE Statement—Checklist of items that should be included in reports of *cohort studies*

|                           | Item No | Recommendation                                                                                                                                                                                                                                                                                                         | Page No              |
|---------------------------|---------|------------------------------------------------------------------------------------------------------------------------------------------------------------------------------------------------------------------------------------------------------------------------------------------------------------------------|----------------------|
| <b>Title and abstract</b> | 1       | (a) Indicate the study's design with a commonly used term in the title or the abstract                                                                                                                                                                                                                                 | 2                    |
|                           |         | (b) Provide in the abstract an informative and balanced summary of what was done and what was found                                                                                                                                                                                                                    | 2                    |
| <b>Introduction</b>       |         |                                                                                                                                                                                                                                                                                                                        |                      |
| Background/rationale      | 2       | Explain the scientific background and rationale for the investigation being reported                                                                                                                                                                                                                                   | 3                    |
| Objectives                | 3       | State specific objectives, including any prespecified hypotheses                                                                                                                                                                                                                                                       | 3                    |
| <b>Methods</b>            |         |                                                                                                                                                                                                                                                                                                                        |                      |
| Study design              | 4       | Present key elements of study design early in the paper                                                                                                                                                                                                                                                                | 4                    |
| Setting                   | 5       | Describe the setting, locations, and relevant dates, including periods of recruitment, exposure, follow-up, and data collection                                                                                                                                                                                        | 4,5                  |
| Participants              | 6       | (a) Give the eligibility criteria, and the sources and methods of selection of participants. Describe methods of follow-up<br>(b) For matched studies, give matching criteria and number of exposed and unexposed                                                                                                      | 4                    |
| Variables                 | 7       | Clearly define all outcomes, exposures, predictors, potential confounders, and effect modifiers. Give diagnostic criteria, if applicable                                                                                                                                                                               | 5                    |
| Data sources/measurement  | 8*      | For each variable of interest, give sources of data and details of methods of assessment (measurement). Describe comparability of assessment methods if there is more than one group                                                                                                                                   | 4                    |
| Bias                      | 9       | Describe any efforts to address potential sources of bias                                                                                                                                                                                                                                                              | 6                    |
| Study size                | 10      | Explain how the study size was arrived at                                                                                                                                                                                                                                                                              | 5                    |
| Quantitative variables    | 11      | Explain how quantitative variables were handled in the analyses. If applicable, describe which groupings were chosen and why                                                                                                                                                                                           | 5,6                  |
| Statistical methods       | 12      | (a) Describe all statistical methods, including those used to control for confounding<br>(b) Describe any methods used to examine subgroups and interactions<br>(c) Explain how missing data were addressed<br>(d) If applicable, explain how loss to follow-up was addressed<br>(e) Describe any sensitivity analyses | 5,6                  |
| <b>Results</b>            |         |                                                                                                                                                                                                                                                                                                                        |                      |
| Participants              | 13*     | (a) Report numbers of individuals at each stage of study—eg numbers potentially eligible, examined for eligibility, confirmed eligible, included in the study, completing follow-up, and analysed<br>(b) Give reasons for non-participation at each stage<br>(c) Consider use of a flow diagram                        | 7                    |
| Descriptive data          | 14*     | (a) Give characteristics of study participants (eg demographic, clinical, social) and information on exposures and potential confounders<br>(b) Indicate number of participants with missing data for each variable of interest<br>(c) Summarise follow-up time (eg, average and total amount)                         | NA - aggregated data |
| Outcome data              | 15*     | Report numbers of outcome events or summary measures over time                                                                                                                                                                                                                                                         | 7, Table 1           |

|    |                          |    |                                                                                                                                                                                                              |                    |
|----|--------------------------|----|--------------------------------------------------------------------------------------------------------------------------------------------------------------------------------------------------------------|--------------------|
| 1  | Main results             | 16 | (a) Give unadjusted estimates and, if applicable, confounder-adjusted estimates and their precision (eg, 95% confidence interval). Make clear which confounders were adjusted for and why they were included | 7, Tables, Figures |
| 2  |                          |    |                                                                                                                                                                                                              |                    |
| 3  |                          |    | (b) Report category boundaries when continuous variables were categorized                                                                                                                                    |                    |
| 4  |                          |    | (c) If relevant, consider translating estimates of relative risk into absolute risk for a meaningful time period                                                                                             |                    |
| 5  | Other analyses           | 17 | Report other analyses done—eg analyses of subgroups and interactions, and sensitivity analyses                                                                                                               | 10                 |
| 6  | <b>Discussion</b>        |    |                                                                                                                                                                                                              |                    |
| 7  | Key results              | 18 | Summarise key results with reference to study objectives                                                                                                                                                     | 11                 |
| 8  | Limitations              | 19 | Discuss limitations of the study, taking into account sources of potential bias or imprecision. Discuss both direction and magnitude of any potential bias                                                   | 13                 |
| 9  | Interpretation           | 20 | Give a cautious overall interpretation of results considering objectives, limitations, multiplicity of analyses, results from similar studies, and other relevant evidence                                   | 11,12              |
| 10 | Generalisability         | 21 | Discuss the generalisability (external validity) of the study results                                                                                                                                        | 13                 |
| 11 | <b>Other information</b> |    |                                                                                                                                                                                                              |                    |
| 12 | Funding                  | 22 | Give the source of funding and the role of the funders for the present study and, if applicable, for the original study on which the present article is based                                                | 14                 |

\*Give information separately for exposed and unexposed groups.

**Note:** An Explanation and Elaboration article discusses each checklist item and gives methodological background and published examples of transparent reporting. The STROBE checklist is best used in conjunction with this article (freely available on the Web sites of PLoS Medicine at <http://www.plosmedicine.org/>, Annals of Internal Medicine at <http://www.annals.org/>, and Epidemiology at <http://www.epidem.com/>). Information on the STROBE Initiative is available at <http://www.strobe-statement.org>.

# BMJ Open

## Examining the immediate and on-going impact of the COVID-19 pandemic on population-based estimates of dementia: a population-based time series analysis in Ontario, Canada

|                                 |                                                                                                                                                                                                                                                                                                                                                                                                                                                                                                                                                                                                                           |
|---------------------------------|---------------------------------------------------------------------------------------------------------------------------------------------------------------------------------------------------------------------------------------------------------------------------------------------------------------------------------------------------------------------------------------------------------------------------------------------------------------------------------------------------------------------------------------------------------------------------------------------------------------------------|
| Journal:                        | <i>BMJ Open</i>                                                                                                                                                                                                                                                                                                                                                                                                                                                                                                                                                                                                           |
| Manuscript ID                   | bmjopen-2022-067689.R2                                                                                                                                                                                                                                                                                                                                                                                                                                                                                                                                                                                                    |
| Article Type:                   | Original research                                                                                                                                                                                                                                                                                                                                                                                                                                                                                                                                                                                                         |
| Date Submitted by the Author:   | 21-Dec-2022                                                                                                                                                                                                                                                                                                                                                                                                                                                                                                                                                                                                               |
| Complete List of Authors:       | Jones, Aaron; Hamilton, Department of Health Research Methods, Evidence, and Impact; ICES<br>Bronskill, Susan; ICES<br>Maclagan, Laura; ICES<br>Jaakkimainen, R. Liisa; University of Toronto, Department of Family and Community Medicine; Sunnybrook Health Sciences Centre, Department of Family and Community Medicine<br>Kirkwood, David; ICES<br>Mayhew, Alexandra; McMaster University, Health Research Methods, Evidence, and Impact<br>Costa, Andrew P ; Hamilton, Department of Health Research Methods, Evidence, and Impact<br>Griffith, Lauren; McMaster University, Clinical Epidemiology and Biostatistics |
| <b>Primary Subject Heading</b>: | Health services research                                                                                                                                                                                                                                                                                                                                                                                                                                                                                                                                                                                                  |
| Secondary Subject Heading:      | Geriatric medicine, Public health                                                                                                                                                                                                                                                                                                                                                                                                                                                                                                                                                                                         |
| Keywords:                       | COVID-19, Dementia < NEUROLOGY, Public health < INFECTIOUS DISEASES, GERIATRIC MEDICINE                                                                                                                                                                                                                                                                                                                                                                                                                                                                                                                                   |
|                                 |                                                                                                                                                                                                                                                                                                                                                                                                                                                                                                                                                                                                                           |

SCHOLARONE™  
Manuscripts



I, the Submitting Author has the right to grant and does grant on behalf of all authors of the Work (as defined in the below author licence), an exclusive licence and/or a non-exclusive licence for contributions from authors who are: i) UK Crown employees; ii) where BMJ has agreed a CC-BY licence shall apply, and/or iii) in accordance with the terms applicable for US Federal Government officers or employees acting as part of their official duties; on a worldwide, perpetual, irrevocable, royalty-free basis to BMJ Publishing Group Ltd ("BMJ") its licensees and where the relevant Journal is co-owned by BMJ to the co-owners of the Journal, to publish the Work in this journal and any other BMJ products and to exploit all rights, as set out in our [licence](#).

The Submitting Author accepts and understands that any supply made under these terms is made by BMJ to the Submitting Author unless you are acting as an employee on behalf of your employer or a postgraduate student of an affiliated institution which is paying any applicable article publishing charge ("APC") for Open Access articles. Where the Submitting Author wishes to make the Work available on an Open Access basis (and intends to pay the relevant APC), the terms of reuse of such Open Access shall be governed by a Creative Commons licence – details of these licences and which [Creative Commons](#) licence will apply to this Work are set out in our licence referred to above.

Other than as permitted in any relevant BMJ Author's Self Archiving Policies, I confirm this Work has not been accepted for publication elsewhere, is not being considered for publication elsewhere and does not duplicate material already published. I confirm all authors consent to publication of this Work and authorise the granting of this licence.



1  
2 Examining the immediate and on-going impact of the COVID-19 pandemic on population-based  
3 estimates of dementia: a population-based time series analysis in Ontario, Canada  
4  
5

6 Aaron Jones, PhD<sup>1,2</sup>

7 Susan E. Bronskill, PhD<sup>2,3,4</sup>

8 Laura C. Maclagan, MSc<sup>2</sup>

9 R. Liisa Jaakkimainen, MD<sup>2,4,5</sup>

10 David Kirkwood, MSc<sup>2</sup>

11 Alexandra Mayhew, PhD<sup>1</sup>

12 Andrew P. Costa, PhD<sup>1,2\*</sup>

13 Lauren E. Griffith, PhD<sup>1\*</sup>

- 14  
15  
16  
17 1. Department of Health Research Methods, Evidence, and Impact, McMaster University, Hamilton,  
18 Ontario, Canada  
19 2. ICES, Toronto, Ontario, Canada  
20 3. Dalla Lana School of Public Health, University of Toronto, Toronto, Ontario, Canada  
21 4. Institute of Health Policy, Management & Evaluation, University of Toronto, Toronto, Ontario, Canada  
22 5. Department of Family and Community Medicine, University of Toronto, Toronto, Ontario, Canada  
23  
24

25 \* AP and LG are co-senior authors

26  
27 **Corresponding Author**

28 Dr. Aaron Jones

29 Assistant Professor

30 Department of Health Research Methods Evidence and Impact

31 McMaster University

32 1280 Main Street W, Hamilton, Ontario, Canada L8S 4L8

33 e: [jonesa13@mcmaster.ca](mailto:jonesa13@mcmaster.ca)

34 p: 416-912-9276

35  
36  
37 **Word count:** 3086  
38  
39  
40  
41  
42  
43  
44  
45  
46  
47  
48  
49  
50  
51  
52  
53  
54  
55  
56  
57  
58  
59  
60

## ABSTRACT

### Objectives

Population-based chronic disease surveillance systems were likely disrupted by the COVID-19 pandemic. The objective of this study was to examine the immediate and on-going impact of COVID-19 pandemic on the claims-based incidence of dementia.

### Methods

We conducted a population-based time series analysis from January 2015 to December 2021 in Ontario, Canada. We calculated the monthly claims-based incidence of dementia using a validated case ascertainment algorithm drawing from routinely-collected health administrative data. We used autoregressive linear models to compare the claims-based incidence of dementia during the COVID-19 period (2020-2021) to the expected incidence had the pandemic not occurred, controlling for seasonality and secular trends. We examined incidence by source of ascertainment and across strata of sex, age, community size, and number of health conditions.

### Results

The monthly claims-based incidence of dementia dropped from a 2019 average of 11.9 per 10,000 to 8.5 per 10,000 in April 2020 (32.6% lower than expected). Incidence returned to expected levels by late 2020. Across the COVID-19 period there were a cumulative 2,990 (95% CI [2,109-3,704]) fewer cases of dementia observed than expected, equivalent to 1.05 months of new cases. Despite the overall recovery, ascertainment rates continued to be lower than expected among individuals aged 65-74 years and in large urban areas. Ascertainment rates were higher than expected in hospital and among individuals with 11 or more health conditions.

### Conclusions

The claims-based incidence of dementia recovered to expected levels by late 2020, suggesting minimal long-term changes to population-based dementia surveillance. Continued monitoring of claims-based incidence is necessary to determine whether the lower than expected incidence among individuals 65-74 and in large urban areas, and higher than expected incidence among individuals with 11 or more health conditions, is transitory.

**Keywords:** COVID-19, dementia, administrative data, chronic disease surveillance

### Strengths and Limitations

- The population-based design enables examination of the research question over a large and representative population.
- The validated case ascertainment algorithm used in the study draws on health system encounters from multiple sectors.
- However, chronic disease ascertainment dates derived from health administrative data may not align with the date of clinical diagnosis.

## INTRODUCTION

Dementia case ascertainment algorithms based on health administrative data are regularly used in population-based research and chronic disease surveillance.[1–3] By tracking the incidence and prevalence of diseases over time, chronic disease surveillance systems provide critical information for public health planning and evaluation.[4] In the absence of national registries or screening programs, administrative databases are a vital source of data on the epidemiology of chronic diseases.[5] Claims-based case ascertainment methods for dementia combine information gathered from routinely-collected health records, including physician encounters, hospital admissions, and dementia-specific medication use, to identify individuals who are likely to have been diagnosed with dementia. The performance of these algorithms varies by setting and jurisdiction, but they typically achieve high positive predictive value with reasonable sensitivity.[6] While these algorithms have clear utility, there are also known challenges as the methods depend on interactions with the health system which can be used to identify dementia diagnoses.[7] Accurate ascertainment requires equitable and consistent access to health services and recording of relevant diagnoses.

The COVID-19 pandemic had a wide-ranging impact on health service use, including reductions in care volumes across settings[8], rapid uptake of virtual care[9], and changes in the most common reasons for which health care was sought.[10] Examining changes in the claims-based incidence of dementia will yield insight into the the disruptions of the pandemic on physician diagnoses of dementia. The extent and longevity of any impact of the COVID-19 pandemic on claims-based incidence of dementia has important implications for the future use of population-based dementia estimates. The objective of this study was to examine how the claims-based incidence of dementia changed across the COVID-19 period in Ontario, Canada, both immediately at the start of the pandemic, as well as over time. We examined differences in the claims-based incidence across contributing data sources (physician encounters, hospital admissions, medications) and across sociodemographic strata of age, sex, community size, and health conditions.

## METHODS

## Setting and Study Design

We conducted a time series analysis using population-based health administrative datasets in Ontario, Canada. Ontario has a population of approximately 15 million individuals, including more than 2 million over the age of 65 years.[11] Ontario's health system includes publicly-funded universal health insurance for medically necessary services, including physician care, hospital-based care, and medication coverage for individuals aged 65 years and older. According to Canadian guidelines[12], routine cognitive screening of asymptomatic individuals for mild cognitive impairment or dementia is not recommended, but the assessment of cognition, activities of daily living, and neuropsychiatric symptoms is indicated when there are clinically significant concerns for a cognitive disorder. In Ontario there are no incentives for clinicians to screen for dementia such as exist for certain other chronic diseases [13].

## Population

Our population was an open cohort of older adults 65 years at risk of dementia. We included older adults living in both community and congregate care settings.

## Dementia case ascertainment

We used the dementia case definition from the Canadian Chronic Disease Surveillance System.[14] The validated algorithm identifies individuals likely diagnosed with dementia using administrative records from physician encounters, hospital admissions, and use of dementia-specific medications. Individuals are considered to have been likely diagnosed with dementia when they meet any one of the following criteria: 1.) three separate physician encounters with a dementia ICD-9/10 code, with at least 30 days separating each encounter; 2.) a single hospital admission with a dementia ICD-9/10 code; or 3.) a single dispensation of a dementia-specific medication (i.e. cholinesterase inhibitors). The ascertainment date is identified as the earliest of the hospital admission date, the medication dispensation date, or the last date of the physician encounter sequence. In Ontario, the algorithm was found to outperform other claims-based formulations and

1  
2 achieved a sensitivity of 79.3%, a specificity of 99.1%, and a positive predictive value of 80.4%.[15] A full  
3  
4 definition of the algorithm including all ICD-9/10 codes and Anatomical Therapeutic Chemical codes is listed in  
5  
6 Supplemental Table 1. The lookback window in the administrative data to exclude individuals with prevalent  
7  
8 dementia from the incidence calculation extended back to 1996.  
9

## 10 11 **Data sources**

12  
13  
14 Diagnosis codes from physician encounters and hospital admissions were extracted from the Ontario  
15  
16 Health Insurance Plan database and the Canadian Institute for Health Information's Discharge Abstract  
17  
18 Database, respectively. Medication use was captured from the Ontario Drug Benefit database. Ontario's  
19  
20 insurable population was identified using the Registered Persons Database. These datasets were linked using  
21  
22 unique encoded identifiers and analyzed at ICES. ICES is an independent, non-profit research institute whose  
23  
24 legal status under Ontario's health information privacy law allows it to collect and analyze health care and  
25  
26 demographic data, without consent, for health system evaluation and improvement.  
27  
28  
29

## 30 31 **Claims-based incidence of dementia**

32  
33  
34 We calculated the monthly claims-based incidence of dementia per 10,000 individuals among older  
35  
36 adults (65+ years) in Ontario at risk of dementia between January 2015 to December 2021. The incidence was  
37  
38 calculated as the number of new ascertainties in a month, divided by the population at risk of dementia at  
39  
40 the start of the month, divided by the count of days in the month, multiplied by 30.  
41  
42

## 43 44 **Statistical analysis**

45  
46 We fit autoregressive linear regression models to the monthly claims-based dementia incidence[16].  
47  
48 Seasonality was controlled for using an indicator variable for each month[17] and long-term trend via a linear  
49  
50 term on the number of months since beginning of the time series. The model was fit on the pre-COVID-19  
51  
52 pandemic period (2015 to 2019). This model was used to generate what the expected incidence of claims-  
53  
54 based dementia would have been during the COVID-19 period (2020-2021) had the pandemic not occurred.  
55  
56  
57  
58  
59

1  
2 We calculated relative and absolute differences between observed and expected claims-based dementia  
3  
4 incidence. We characterized the initial decline in claims-based incidence by comparing the observed and  
5  
6 expected incidence at the month of the lowest observed incidence in 2020. We calculated the difference  
7  
8 between the count of observed and expected dementia case ascertainment by applying the difference  
9  
10 between the between the observed and expected incidences to the population at risk each month. We  
11  
12 examined cumulative differences in the count of observed and expected dementia case ascertainment within  
13  
14 calendar years and across the entire COVID-19 period. We constructed 95% confidence intervals around the  
15  
16 cumulative differences in case ascertainment during the COVID-19 period using a 5000-replicate block  
17  
18 bootstrap[18] with a block size of 3 months. To facilitate comparison across strata of different sizes, we  
19  
20 expressed the cumulative difference in case ascertainment in terms of the number of months of new  
21  
22 ascertainment they represent based on 2019 figures.  
23  
24  
25

26  
27 We stratified the main analysis by data source (physician encounters, hospital admissions,  
28  
29 medications) to identify whether certain sources were more strongly affected by the pandemic. We  
30  
31 additionally stratified by age (65-74,75-84,85+), sex (male vs. female), community size (large urban, small  
32  
33 urban, rural), and count of health conditions (0-5, 6-10, 11+) to explore differential effects across  
34  
35 sociodemographic strata. Community size was defined using the Rurality Index of Ontario[19]. Health  
36  
37 condition count was defined using the Canadian Institute for Health Information Population Health  
38  
39 Grouper[20], which includes 226 health conditions that can be ascertained via administrative data sources. All  
40  
41 analyses were performed using R version 4.0.3.[21]  
42  
43  
44

#### 45 **Sensitivity analysis**

46  
47  
48 To examine whether the changes in claims-based incidence were related to a shifting population  
49  
50 composition, we repeated the main analyses using incidence rates that were standardized to the age-sex  
51  
52 distribution of Ontario on January 2015. We also repeated the main analysis among only the community-  
53  
54  
55  
56  
57  
58  
59  
60

dwelling older adult population to examine to what degree changes were due to the disproportionate impact of the pandemic on long-term care homes.

### Patient and Public Involvement

No patients were involved at the conduct of this study due to limited time and resources. We have invited patients and stakeholders to help us develop and carry out our knowledge dissemination strategy.

## RESULTS

The population of the older adults at risk of dementia varied from 2,030,431 (January 2015) to 2,569,017 (December 2021). The monthly claims-based incidence of dementia declined slightly across the pre-COVID-19 period from an average of 12.5 cases per 10,000 in 2015 to 11.9 cases per 10,000 in 2019. Physician encounters were the most common source of case ascertainment across the entire time series, representing approximately 50% of new cases. Claims-based incidence dropped sharply during the first months of the COVID-19 period reaching a nadir of 8.5 per 1,000 in April 2020 (32.6% less than expected) (Table 1). By late 2020, the observed incidence had returned to the pre-pandemic expected incidence but did not appreciably rebound above expected levels (Figure 1).

**Table 1.** Observed and expected claims-based dementia incidence with relative and absolute differences, Jan 2020 to Dec 2021, Ontario, Canada

| Month  | Observed incidence | Expected incidence | Relative difference | Absolute difference in cases <sup>1,2</sup> | Cumulative difference in cases since Jan 2020 | Cumulative difference in months of expected cases <sup>3</sup> |
|--------|--------------------|--------------------|---------------------|---------------------------------------------|-----------------------------------------------|----------------------------------------------------------------|
| Jan-20 | 12.5               | 12.1               | 3%                  | 95                                          | 95                                            | 0.03                                                           |
| Feb-20 | 10.5               | 11.5               | -8%                 | -225                                        | -130                                          | -0.05                                                          |
| Mar-20 | 9.3                | 11.5               | -19%                | -540                                        | -670                                          | -0.23                                                          |
| Apr-20 | 8.5                | 12.6               | -33%                | -1012                                       | -1682                                         | -0.59                                                          |
| May-20 | 9.0                | 12.2               | -26%                | -781                                        | -2463                                         | -0.86                                                          |
| Jun-20 | 10.2               | 12.2               | -17%                | -501                                        | -2964                                         | -1.04                                                          |
| Jul-20 | 10.7               | 11.3               | -6%                 | -162                                        | -3125                                         | -1.09                                                          |
| Aug-20 | 10.1               | 10.9               | -8%                 | -213                                        | -3338                                         | -1.17                                                          |
| Sep-20 | 11.5               | 11.6               | -1%                 | -30                                         | -3369                                         | -1.18                                                          |
| Oct-20 | 11.5               | 11.8               | -3%                 | -77                                         | -3446                                         | -1.21                                                          |

|    |                                                  |      |      |     |      |                       |       |
|----|--------------------------------------------------|------|------|-----|------|-----------------------|-------|
| 1  |                                                  |      |      |     |      |                       |       |
| 2  | Nov-20                                           | 11.9 | 12.4 | -4% | -114 | -3560                 | -1.25 |
| 3  | Dec-20                                           | 10.7 | 10.3 | 4%  | 110  | -3450                 | -1.21 |
| 4  | Jan-21                                           | 10.9 | 11.9 | -8% | -253 | -3703                 | -1.30 |
| 5  | Feb-21                                           | 11.5 | 11.3 | 1%  | 42   | -3661                 | -1.28 |
| 6  | Mar-21                                           | 12.6 | 11.4 | 11% | 311  | -3350                 | -1.17 |
| 7  | Apr-21                                           | 11.7 | 12.5 | -6% | -191 | -3541                 | -1.24 |
| 8  | May-21                                           | 11.3 | 12.0 | -6% | -174 | -3714                 | -1.30 |
| 9  | Jun-21                                           | 12.6 | 12.0 | 5%  | 148  | -3567                 | -1.25 |
| 10 | Jul-21                                           | 11.1 | 11.2 | -1% | -20  | -3587                 | -1.26 |
| 11 | Aug-21                                           | 11.2 | 10.8 | 4%  | 105  | -3482                 | -1.22 |
| 12 | Sep-21                                           | 11.9 | 11.4 | 4%  | 129  | -3353                 | -1.17 |
| 13 | Oct-21                                           | 12.0 | 11.7 | 3%  | 78   | -3275                 | -1.15 |
| 14 | Nov-21                                           | 13.0 | 12.2 | 6%  | 205  | -3070                 | -1.07 |
| 15 | Dec-21                                           | 10.4 | 10.1 | 3%  | 80   | -2990                 | -1.05 |
| 16 |                                                  |      |      |     |      |                       |       |
| 17 |                                                  |      |      |     |      |                       |       |
| 18 |                                                  |      |      |     |      |                       |       |
| 19 | 2020 Cumulative difference in cases (95%CI)      |      |      |     |      | -3,450 (-3753,-3,078) |       |
| 20 | 2021 Cumulative difference in cases (95%CI)      |      |      |     |      | 460 (49, 957)         |       |
| 21 | 2020-2021 Cumulative difference in cases (95%CI) |      |      |     |      | -2,990 (-3,704-2,109) |       |
| 22 |                                                  |      |      |     |      |                       |       |
| 23 |                                                  |      |      |     |      |                       |       |
| 24 |                                                  |      |      |     |      |                       |       |
| 25 |                                                  |      |      |     |      |                       |       |
| 26 |                                                  |      |      |     |      |                       |       |
| 27 |                                                  |      |      |     |      |                       |       |
| 28 |                                                  |      |      |     |      |                       |       |
| 29 |                                                  |      |      |     |      |                       |       |
| 30 |                                                  |      |      |     |      |                       |       |
| 31 |                                                  |      |      |     |      |                       |       |
| 32 |                                                  |      |      |     |      |                       |       |
| 33 |                                                  |      |      |     |      |                       |       |
| 34 |                                                  |      |      |     |      |                       |       |
| 35 |                                                  |      |      |     |      |                       |       |
| 36 |                                                  |      |      |     |      |                       |       |
| 37 |                                                  |      |      |     |      |                       |       |
| 38 |                                                  |      |      |     |      |                       |       |
| 39 |                                                  |      |      |     |      |                       |       |
| 40 |                                                  |      |      |     |      |                       |       |
| 41 |                                                  |      |      |     |      |                       |       |
| 42 |                                                  |      |      |     |      |                       |       |
| 43 |                                                  |      |      |     |      |                       |       |
| 44 |                                                  |      |      |     |      |                       |       |
| 45 |                                                  |      |      |     |      |                       |       |
| 46 |                                                  |      |      |     |      |                       |       |
| 47 |                                                  |      |      |     |      |                       |       |
| 48 |                                                  |      |      |     |      |                       |       |
| 49 |                                                  |      |      |     |      |                       |       |
| 50 |                                                  |      |      |     |      |                       |       |
| 51 |                                                  |      |      |     |      |                       |       |
| 52 |                                                  |      |      |     |      |                       |       |
| 53 |                                                  |      |      |     |      |                       |       |
| 54 |                                                  |      |      |     |      |                       |       |
| 55 |                                                  |      |      |     |      |                       |       |
| 56 |                                                  |      |      |     |      |                       |       |
| 57 |                                                  |      |      |     |      |                       |       |
| 58 |                                                  |      |      |     |      |                       |       |
| 59 |                                                  |      |      |     |      |                       |       |
| 60 |                                                  |      |      |     |      |                       |       |

1. Calculated as difference between observed and expected incidence multiplied by population at risk of dementia, rounded to whole number
2. Rounded to whole number
3. Based on monthly average of new ascertainties in 2019

Between January 2020 and December 2021, there were a cumulative 2,990 (95% CI: 2,109-3,704) fewer case ascertainties observed than expected, a gap equivalent to 1.05 months of cases based on 2019 averages. The vast majority of the fewer-than-expected ascertainties were accumulated between February 2020 and June 2020. Across 2021 as a whole, there were slightly more cases observed than expected (460 cases (95% CI: 49, 957)). In each of the final five months of the time series, the observed count exceeded the expected count by 3%-6% (Table 1).

All data sources exhibited drops in claims-based incidence during the first months of the pandemic, with medication use demonstrating the largest relative decrease (59.4%) in April 2020, compared to 26.9% for physician encounters, and 27.4% for hospital admissions (Figure 2, Table 2). After the initial decline, ascertainties in the hospital setting recovered the quickest, followed by medication use. Throughout 2021,



observed case ascertainment from physician encounters continued to lag behind expected ascertainment, while observed ascertainment in the other settings exceeded the expected number of cases.

**Table 2.** Changes in the claims-based dementia incidence during the COVID-19 pandemic with cumulative differences between observed and expected cases, by data source, sex, age, community size, and chronic condition count in Ontario, Canada

| Measure                                                                                           | Overall              | Data source          |                      |                      |
|---------------------------------------------------------------------------------------------------|----------------------|----------------------|----------------------|----------------------|
|                                                                                                   |                      | Physician encounters | Hospital admissions  | Medication use       |
| 2019 Average incidence / 10,000                                                                   | 11.9                 | 6.2                  | 2.9                  | 2.7                  |
| 2020 Nadir incidence / 10,000                                                                     | 8.5                  | 4.9                  | 2.1                  | 1.1                  |
| Percent drop in incidence at nadir vs. expected                                                   | 32.6%                | 26.9%                | 27.4%                | 59.4%                |
| 2020 Cumulative difference observed vs. expected cases (in months of new cases) <sup>1</sup>      | -1.21 (-1.32, -1.08) | -1.63 (-1.53, 1.41)  | 0.32 (-0.03, 0.72)   | -1.78 (-2.19, -1.38) |
| 2021 Cumulative difference observed vs. expected cases (in months of new cases) <sup>1</sup>      | 0.16 (0.01, 0.32)    | -1.23 (-1.52, -0.94) | 1.90 (1.43, 2.45)    | 1.51 (0.96, 2.04)    |
| 2020-2021 Cumulative difference observed vs. expected cases (in months of new cases) <sup>1</sup> | -1.05 (-1.31, -0.77) | -2.86 (-3.36, -2.35) | 2.23 (1.38, 3.17)    | -0.27 (-1.23, 0.66)  |
| Measure                                                                                           | Overall              | Sex                  |                      |                      |
|                                                                                                   |                      | Male                 | Female               |                      |
| 2019 Average incidence / 10,000                                                                   | 11.9                 | 10.7                 | 12.9                 |                      |
| 2020 Nadir incidence / 10,000                                                                     | 8.5                  | 7.4                  | 9.4                  |                      |
| Percent drop in incidence at nadir vs. expected                                                   | 32.6%                | 34.6%                | 31.1%                |                      |
| 2020 Cumulative difference observed vs. expected cases (in months of new cases) <sup>1</sup>      | -1.21 (-1.32, -1.08) | -1.06 (-1.23, -0.88) | -1.32 (-1.47, -1.16) |                      |
| 2021 Cumulative difference observed vs. expected cases (in months of new cases) <sup>1</sup>      | 0.16 (0.01, 0.32)    | 0.32 (0.10, 0.55)    | 0.04 (-0.16, 0.26)   |                      |
| 2020-2021 Cumulative difference observed vs. expected cases (in months of new cases) <sup>1</sup> | -1.05 (-1.31, -0.77) | -0.73 (-1.13, -0.33) | -1.28 (-1.63, -0.90) |                      |
| Measure                                                                                           | Overall              | Age                  |                      |                      |
|                                                                                                   |                      | 65-74                | 76-85                | 85+                  |

|                                                                                                   |                      |                      |                      |                      |
|---------------------------------------------------------------------------------------------------|----------------------|----------------------|----------------------|----------------------|
| 2019 Average incidence / 10,000                                                                   | 11.9                 | 3.6                  | 15.6                 | 48.4                 |
| 2020 Nadir incidence / 10,000                                                                     | 8.5                  | 2.7                  | 10.6                 | 36.0                 |
| Percent drop in incidence at nadir vs. expected                                                   | 32.6%                | 30.1%                | 36.0%                | 30.0%                |
| 2020 Cumulative difference observed vs. expected cases (in months of new cases) <sup>1</sup>      | -1.21 (-1.32, -1.08) | -1.39 (-1.64, -1.17) | -1.19 (-1.36, -0.99) | -1.08 (-1.28, -0.89) |
| 2021 Cumulative difference observed vs. expected cases (in months of new cases) <sup>1</sup>      | 0.16 (0.01, 0.32)    | -0.29 (-0.59, -0.02) | 0.40 (0.16, 0.65)    | 0.16 (-0.09, 0.41)   |
| 2020-2021 Cumulative difference observed vs. expected cases (in months of new cases) <sup>1</sup> | -1.05 (-1.31, -0.77) | -1.67 (-2.26, -1.16) | -0.49 (-1.20, -0.35) | -0.92 (-1.38, -0.49) |
| <b>Community size</b>                                                                             |                      |                      |                      |                      |
| <b>Measure</b>                                                                                    | <b>Overall</b>       | <b>Large Urban</b>   | <b>Small Urban</b>   | <b>Rural</b>         |
| 2019 Average incidence / 10,000                                                                   | 11.9                 | 12.4                 | 10.9                 | 11.0                 |
| 2020 Nadir incidence / 10,000                                                                     | 8.5                  | 8.9                  | 7.7                  | 7.1                  |
| Percent drop in incidence at nadir vs. expected                                                   | 32.6%                | 32.4%                | 31.0%                | 38.8%                |
| 2020 Cumulative difference observed vs. expected cases (in months of new cases) <sup>1</sup>      | -1.21 (-1.32, -1.08) | -1.46 (-1.25, -1.54) | -0.53 (-0.24, -0.81) | -0.89 (-1.43, -0.33) |
| 2021 Cumulative difference observed vs. expected cases (in months of new cases) <sup>1</sup>      | 0.16 (0.01, 0.32)    | -0.20 (-0.36, -0.02) | 0.94 (0.61, 1.30)    | 0.04 (-0.69, 0.77)   |
| 2020-2021 Cumulative difference observed vs. expected cases (in months of new cases) <sup>1</sup> | -1.05 (-1.31, -0.77) | -1.62 (-1.90, -1.26) | 0.41 (-0.20, 0.90)   | -0.86 (-2.11, 0.44)  |
| <b>Health Conditions</b>                                                                          |                      |                      |                      |                      |
| <b>Measure</b>                                                                                    | <b>Overall</b>       | <b>0-5</b>           | <b>6-10</b>          | <b>11+</b>           |
| 2019 Average incidence / 10,000                                                                   | 11.9                 | 6.5                  | 14.8                 | 42.1                 |
| 2020 Nadir incidence / 10,000                                                                     | 8.5                  | 4.6                  | 10.7                 | 35.7                 |
| Percent drop in incidence at nadir vs. expected                                                   | 32.6%                | 34.4%                | 30.9%                | 17.8%                |
| 2020 Cumulative difference observed vs. expected cases (in months of new cases) <sup>1</sup>      | -1.21 (-1.32, -1.08) | -1.92 (-2.19, -1.66) | -0.50 (-0.72, -0.26) | 1.00 (0.76, 1.23)    |
| 2021 Cumulative difference observed vs. expected cases (in months of new cases) <sup>1</sup>      | 0.16 (0.01, 0.32)    | -0.68 (-0.35, 0.05)  | 1.37 (1.10, 1.66)    | 2.44 (2.14, 2.73)    |
| 2020-2021 Cumulative difference observed vs. expected cases (in months of new cases) <sup>1</sup> | -1.05 (-1.31, -0.77) | -2.30 (-2.87, -1.60) | 0.88 (0.38, 1.40)    | 3.44 (2.90, 3.96)    |

1. Cumulative difference between observed and expected cases expressed in terms of the number of months of new cases based on 2019 figures

### Analysis across sociodemographic strata

Initial declines in claims-based incidence across sociodemographic strata were broadly similar, with the smallest drop at 30.0% less than expected among individuals 85+ and the largest drop at 38.8% less than expected among individuals living in rural locations (Figure 2, Table 2). Recoveries were uneven however, and ascertainment in 2021 among individuals aged 65-74 and those residing in large urban locations tracked below expected levels, while ascertainment among those in small urban locations tracked significantly higher.

Most differences were evident across strata defined by number of health conditions. The initial drop in the strata of 0-5 conditions was 34.4% compared to only 17.8% in the strata of those with 11+ conditions. Notably, while the claims-based incidence in the 0-5 condition group recovered much more slowly than the overall population, the incidence in the 11+ group exceeded the expected ascertainment counts even in 2020 and ended the 2020-2021 period with an excess of 3.44 months of ascertainment.

### Sensitivity analysis

The standardized claims-based incidence rate remained similar to observed rate across the study period, drifting higher to a maximum difference of 0.18 in March of 2021 (Supplemental Table 2). Repeating the primary analysis using the standardized incidence rate yielded a cumulative difference of 1.04 (0.73, 1.30) months fewer ascertainment than expected, nearly identical to the main analysis (Supplemental Table 3). Including only the community-dwelling population reduced the average 2019 incidence per 10,000 from 12.04 to 10.32. Replicating the primary analysis resulted in a cumulative difference of 0.89 (0.57, 1.23) months fewer ascertainment than expected across the pandemic period, slightly lower than the primary analysis.

## DISCUSSION

1  
2 We found that the claims-based incidence of dementia in Ontario dropped sharply at the start of the  
3  
4 COVID-19 pandemic in 2020. Claims-based incidence returned to expected levels by the end of 2020 but did  
5  
6 not appreciably rebound above the expected levels. As a result, across the pandemic period there have been  
7  
8 significantly fewer dementia ascertainties observed than expected. Although the overall incidence returned  
9  
10 to normal levels, the recovery was uneven. Cases ascertained via physician encounters, among individuals 65-  
11  
12 74 years of age, and in large urban areas have continued to lag expected counts. Cases ascertained in hospital  
13  
14 and among individuals with 11 or more health conditions have exceeded expected counts.  
15  
16  
17

18 The drop in the claims-based incidence of dementia in early 2020 mirrors the reductions in health  
19  
20 service use that occurred in Ontario at the same time across multiple sectors, including outpatient physician  
21  
22 visits, emergency department visits, and hospital admissions.[8,9,22] At the nadir in April 2020,  
23  
24 hospitalizations and emergency department visits were approximately 50% lower than historical levels, while  
25  
26 rates of outpatient physician services dropped by 40%. However, usage rates within all sectors returned to  
27  
28 normal levels by the end of the 2020. The observed claims-based incidence also returned to the expected  
29  
30 incidence along the same timeline, which broadly suggests no major long-term changes to the performance of  
31  
32 the case ascertainment algorithms. A temporary drop in the claims-based incidence due to lockdowns,  
33  
34 avoidance of in-person visits, and reduced access to community-based physician care may amount to a mere  
35  
36 historical anomaly. However, the small, but enduring, ascertainment gap bears continued monitoring.  
37  
38  
39  
40

41 The etiology of the persistent undercount in cases is likely multifactorial in nature. Given how closely  
42  
43 the fall and rise of the claims-based incidence follows the broader rates of health service use, one likely  
44  
45 contributor is change in health-seeking behavior, patient access to health care services, and delivery of health  
46  
47 services during the pandemic and recovery. This is further supported by the observation of larger impacts in  
48  
49 the younger and healthier groups that typically use less care. Younger individuals experienced greater relative  
50  
51 reductions in health service use during the pandemic compared to older individuals and therefore it may take  
52  
53 more time for the ascertainment rates for younger individuals to regain their normal levels[23]. Beyond  
54  
55  
56  
57  
58  
59  
60

1  
2 changes in health service use, another likely contributing factor is higher relative mortality rates among  
3  
4 individuals at higher risk of developing dementia[24]. This effect would be most noticeable among population  
5  
6 with the high COVID-related mortality, such as residents of long-term care homes. A mortality effect likely  
7  
8 explains the differences we observed between the overall population and community-dwelling subset.  
9

10  
11 Notably, we found that ascertainment from physician encounters lagged expected counts throughout  
12  
13 the entire pandemic period, despite the fact that overall physician visit volumes recovered to normal levels in  
14  
15 2020[23]. This may be related to the rapid uptake of virtual care as the challenges of performing cognitive  
16  
17 testing virtually may lead to fewer or delayed diagnoses of dementia as physicians adapt to new tools[25,26].  
18  
19 For example, comorbid sensory impairment is a contraindication for remote cognitive screening[27].  
20  
21 Additionally, virtual care may also be less accessible to older adults living with frailty or without a  
22  
23 caregiver[28]. Finally, ascertainment via physician encounters are more susceptible to disruption as the  
24  
25 algorithm requires a specific number of visits within a specific time frame. An interruption in access may break  
26  
27 the sequence of visits and delay ascertainment. The lower than expected incidence within large urban areas is  
28  
29 at a glance surprising as individuals within these areas typically have the greatest access to health care[29].  
30  
31 However, the shift to virtual visits was most pronounced in urban areas.[9] Additionally, urban areas were  
32  
33 under strict public health measures for longer periods of time and therefore individuals in the these areas may  
34  
35 have experienced longer delays in resuming normal health service use levels[30].  
36  
37  
38  
39  
40

41 While we observed fewer than expected cases within most strata, there were two subgroups for which  
42  
43 we observed higher incidence – hospital ascertainment and individuals with 11 or more health conditions.  
44  
45 The increase in the ascertainment in hospital is concordant with published reports that hospital admission  
46  
47 rates for dementia and delirium increased or held steady during the pandemic even as overall hospitalization  
48  
49 rates declined [2,31–33]. This population with 11 or more health conditions is small, approximately 7% of the  
50  
51 older adult population without dementia, but is highly comorbid, at high risk of developing dementia, and are  
52  
53 frequent users of the health care system[34]. The higher incidence in this population may be partially a result  
54  
55  
56  
57  
58  
59  
60

1  
2 of increased social isolation in those living alone and visitation restrictions in hospitals and congregate care  
3  
4 settings. Conversely, for those living in multigenerational households, the increase in remote work during the  
5  
6 pandemic may have afforded caregivers additional opportunity to observe cognitive or behavioral changes in  
7  
8 older family members, leading them to seek formal evaluation. Additionally there is emerging evidence that  
9  
10 cognitive decline, including increased risk of developing dementia, is a long-term sequelae of COVID-19  
11  
12 infection[35]. Further cohort studies should focus on changes in dementia incidence in this highly co-morbid  
13  
14 population.  
15  
16

17  
18 The unevenness of the rebound in claims-based incidence of dementia across various  
19  
20 sociodemographic strata warrants on-going monitoring to determine whether the incidence eventually reverts  
21  
22 to the long-term averages. Research studies that rely on claims-based dementia ascertainment to generate  
23  
24 cohorts or define outcomes need to carefully consider the impact of the pandemic on their research.  
25  
26 Additionally, health system policymakers should carefully consider the impact of any future public health  
27  
28 restrictions on individuals at elevated risk of developing dementia. In particular, ensuring family members and  
29  
30 caregivers can visit patients in hospital and long-term care homes can reduce the risk of delirium and dementia  
31  
32 associated with increased social isolation. Also, in-person visits healthcare visits for individuals with difficulty  
33  
34 participating in virtual consultations should be preserved to protect access to care and diagnosis. A missed or  
35  
36 delayed diagnosis of dementia reduces the time during which the person living with dementia can maintain  
37  
38 control of decision-making and care planning and delays the initiation of interventions that may slow cognitive  
39  
40 decline[36,37].  
41  
42  
43  
44

#### 45 **Limitations**

46  
47  
48 Case ascertainment via administrative data enables population-based chronic disease surveillance, but  
49  
50 does not perfectly correspond to clinical diagnoses or necessarily represent the experience of the individual.  
51  
52 For example, a physician may communicate a diagnosis to patient without entering it into the administrative  
53  
54 record. In addition, the case detection via administrative requires equitable access to care and thus may  
55  
56  
57  
58  
59

1  
2 underperform among populations with impaired access. Ultimately research using case ascertainment from  
3  
4 administrative data cannot replace traditional cohort studies to capture the patient experience of people living  
5  
6 with dementia. Additionally, distinguishing delirium from dementia can be challenging, particularly in acute  
7  
8 care setting[38]. Higher ascertainment rates in highly comorbid populations and in hospital settings may be in  
9  
10 part due to diagnostic challenges. Finally, differences in the severity of COVID-19 pandemic and public health  
11  
12 system response may result in differences in how population-based dementia estimates have changed across  
13  
14 jurisdictions.  
15

## 16 17 18 **Conclusion**

19  
20  
21 Claims-based dementia incidence as estimated from routinely-collected data fell early in the COVID-19  
22  
23 pandemic but returned to expected levels by late 2020. However, as of the end of 2021 there were still  
24  
25 significantly fewer cumulative dementia cases observed than expected across the pandemic period. Rates of  
26  
27 case ascertainment were lower than expected among individuals 65-74 years old and in large urban areas even  
28  
29 after health service use rebounded. Cases ascertained in hospital and among individuals with 11+ health  
30  
31 conditions were higher than expected. Continued population-based monitoring of dementia incidence is  
32  
33 necessary to identify whether these effects are transitory.  
34  
35  
36

## 37 38 **ETHICS APPROVAL STATEMENT**

39 ICES is a prescribed entity under Ontario's Personal Health Information Protection Act (PHIPA). Section 45 of  
40  
41 PHIPA authorizes ICES to collect personal health information, without consent, for the purpose of analysis or  
42  
43 compiling statistical information with respect to the management of, evaluation or monitoring of, the  
44  
45 allocation of resources to or planning for all or part of the health system. Projects that use data collected by  
46  
47 ICES under section 45 of PHIPA, and use no other data, are exempt from REB review. The use of the data in this  
48  
49 project is authorized under section 45 and approved by ICES' Privacy and Legal Office.

## 50 51 52 **DATA SHARING STATEMENT**

53 The dataset from this study is held securely in coded form at ICES. While data sharing agreements prohibit ICES  
54  
55 from making the dataset publicly available, access may be granted to those who meet prespecified criteria for  
56  
57 confidential access, available at [www.ices.on.ca/DAS](http://www.ices.on.ca/DAS). The full dataset creation plan and underlying analytic  
58  
59 code are available from the authors upon request, understanding that the computer programs may rely upon  
60  
coding templates or macros that are unique to ICES and are therefore either inaccessible or may require  
modification.

## 61 62 63 **CONTRIBUTORS**

1  
2 AJ, AC, and LG conceived the work. AJ developed the design and conducted all analyses. DK performed data  
3 curation. AJ wrote the initial draft. AJ,SB, LM, RLJ, DK, AM, AC, and LG contributed to the interpretation of the  
4 work and revised the work for critical intellectual content.  
5

## 6 **COMPETING INTERERERSTS**

7

8  
9 None to report  
10

## 11 **FUNDING**

12

13  
14 This study received funding from the Public Health Agency of Canada (2021-HQ-000076). This study was  
15 supported by ICES, which is funded by an annual grant from the Ontario Ministry of Health and the Ministry of  
16 Long-Term Care.  
17

## 18 **DISCLAIMER**

19

20  
21 Parts of this material are based on data and information compiled and provided by the Ontario Ministry of  
22 Health. This document used data adapted from the Statistics Canada Postal Code<sup>OM</sup> Conversion File, which is  
23 based on data licensed from Canada Post Corporation, and/or data adapted from the Ontario Ministry of  
24 Health Postal Code Conversion File, which contains data copied under license from ©Canada Post Corporation  
25 and Statistics Canada. Parts of this material are also based on data and information compiled and provided by  
26 the Canadian Institute for Health Information. The analyses, conclusions, opinions, and statements expressed  
27 herein are solely those of the authors and do not reflect those of the funding or data sources; no endorsement  
28 is intended or should be inferred. We thank IQVIA Solutions Canada Inc for use of their Drug Information File.  
29  
30  
31  
32

## 33 **References**

34

- 35 1 Davis MA, Chang C-H, Simonton S, *et al.* Trends in US Medicare Decedents' Diagnosis of Dementia From  
36 2004 to 2017. *JAMA Health Forum* 2022;**3**:e220346. doi:10.1001/jamahealthforum.2022.0346  
37
- 38 2 Jones A, Maclagan LC, Watt JA, *et al.* Reasons for repeated emergency department visits among  
39 community-dwelling older adults with dementia in Ontario, Canada. *Journal of the American Geriatrics*  
40 *Society* 2022;**n/a**. doi:10.1111/jgs.17726  
41
- 42 3 Welberry HJ, Brodaty H, Hsu B, *et al.* Measuring dementia incidence within a cohort of 267,153 older  
43 Australians using routinely collected linked administrative data. *Sci Rep* 2020;**10**:8781.  
44 doi:10.1038/s41598-020-65273-w  
45
- 46 4 Thacker SB, Stroup DF, Rothenberg RB, *et al.* Public health surveillance for chronic conditions: A scientific  
47 basis for decisions. *Statistics in Medicine* 1995;**14**:629–41. doi:10.1002/sim.4780140520  
48
- 49 5 Lix LM, Yogendran MS, Shaw SY, *et al.* Population-based data sources for chronic disease surveillance.  
50 *Chronic Dis Can* 2008;**29**:31–8.  
51
- 52 6 Wilkinson T, Ly A, Schnier C, *et al.* Identifying dementia cases with routinely collected health data:  
53 A systematic review. *Alzheimers Dement* 2018;**14**:1038–51. doi:10.1016/j.jalz.2018.02.016  
54  
55  
56  
57  
58  
59



- 7 Festa N, Price M, Moura LMVR, *et al.* Evaluation of Claims-Based Ascertainment of Alzheimer Disease and Related Dementias Across Health Care Settings. *JAMA Health Forum* 2022;**3**:e220653. doi:10.1001/jamahealthforum.2022.0653
- 8 Bronskill SE, Maclagan LC, Maxwell CJ, *et al.* Trends in Health Service Use for Canadian Adults With Dementia and Parkinson Disease During the First Wave of the COVID-19 Pandemic. In: *JAMA Health Forum*. American Medical Association 2022. e214599–e214599.
- 9 Glazier RH, Green ME, Wu FC, *et al.* Shifts in office and virtual primary care during the early COVID-19 pandemic in Ontario, Canada. *CMAJ* 2021;**193**:E200–10. doi:10.1503/cmaj.202303
- 10 Stephenson E, Butt DA, Gronsbell J, *et al.* Changes in the top 25 reasons for primary care visits during the COVID-19 pandemic in a high-COVID region of Canada. *PLOS ONE* 2021;**16**:e0255992. doi:10.1371/journal.pone.0255992
- 11 Ontario population projections. Ontario.ca. <http://ontario-v2.vpc.ont/page/ontario-population-projections> (accessed 24 Aug 2021).
- 12 Ismail Z, Black SE, Camicioli R, *et al.* Recommendations of the 5th Canadian Consensus Conference on the diagnosis and treatment of dementia. *Alzheimer's & Dementia* 2020;**16**:1182–95. doi:10.1002/alz.12105
- 13 Thavam T, Devlin RA, Thind A, *et al.* The impact of the diabetes management incentive on diabetes-related services: evidence from Ontario, Canada. *Eur J Health Econ* 2020;**21**:1279–93. doi:10.1007/s10198-020-01216-6
- 14 Canada PHA of. The Canadian Chronic Disease Surveillance System – An Overview. 2018. <https://www.canada.ca/en/public-health/services/publications/canadian-chronic-disease-surveillance-system-factsheet.html> (accessed 6 Jun 2022).
- 15 Jaakkimainen RL, Bronskill SE, Tierney MC, *et al.* Identification of Physician-Diagnosed Alzheimer's Disease and Related Dementias in Population-Based Administrative Data: A Validation Study Using Family Physicians' Electronic Medical Records. *J Alzheimers Dis* 2016;**54**:337–49. doi:10.3233/JAD-160105
- 16 Box GEP, Jenkins GM, Reinsel GC. *Time series analysis: forecasting and control*. 3rd ed. Englewood Cliffs, N.J.: : Prentice Hall 1994. <http://www.gbv.de/dms/bowker/toc/9780130607744.pdf> (accessed 17 Nov 2022).
- 17 Bernal JL, Cummins S, Gasparrini A. Interrupted time series regression for the evaluation of public health interventions: a tutorial. *International Journal of Epidemiology* 2017;**46**:348–55. doi:10.1093/ije/dyw098
- 18 Lahiri SN. Theoretical Comparisons of Block Bootstrap Methods. *The Annals of Statistics* 1999;**27**:386–404.
- 19 Kralj B. Measuring Rurality - RIO2008\_BASIC: Methodology and Results. Toronto: : Ontario Medical Association 2009. [https://docplayer.net/91599736-Measuring-rurality-rio2008\\_basic-methodology-and-results.html](https://docplayer.net/91599736-Measuring-rurality-rio2008_basic-methodology-and-results.html) (accessed 20 Apr 2021).
- 20 CIHI's Population Grouping Methodology 1.3 — Overview and Outputs, 2021. ;:28.
- 21 R Core Team. R: A language and environment for statistical computing. 2020.

- 1  
2 22 Axenus M, Schedin-Weiss S, Tjernberg L, *et al.* Changes in dementia diagnoses in Sweden during the  
3 COVID-19 pandemic. *BMC Geriatr* 2022;**22**:365. doi:10.1186/s12877-022-03070-y  
4
- 5 23 COVID-19's impact on physician services | CIHI. [https://www.cihi.ca/en/covid-19-resources/impact-of-](https://www.cihi.ca/en/covid-19-resources/impact-of-covid-19-on-canadas-health-care-systems/physician-services)  
6 [covid-19-on-canadas-health-care-systems/physician-services](https://www.cihi.ca/en/covid-19-resources/impact-of-covid-19-on-canadas-health-care-systems/physician-services) (accessed 7 Jun 2022).  
7
- 8 24 Wang Y, Li M, Kazis LE, *et al.* Clinical outcomes of COVID-19 infection among patients with Alzheimer's  
9 disease or mild cognitive impairment. *Alzheimers Dement* 2022;**18**:911–23. doi:10.1002/alz.12665  
10
- 11 25 Saxena S, Factora R, Hashmi A, *et al.* Assessing cognition in the era of COVID19: Do we need methods to  
12 assess cognitive function virtually? *Alzheimers Dement* 2021;**17 Suppl 8**:e050074. doi:10.1002/alz.050074  
13  
14
- 15 26 Watt JA, Lane NE, Veroniki AA, *et al.* Diagnostic accuracy of virtual cognitive assessment and testing:  
16 Systematic review and meta-analysis. *Journal of the American Geriatrics Society* 2021;**69**:1429–40.  
17
- 18 27 Geddes MR, O'Connell ME, Fisk JD, *et al.* Remote cognitive and behavioral assessment: Report of the  
19 Alzheimer Society of Canada Task Force on dementia care best practices for COVID-19. *Alzheimers Dement*  
20 *(Amst)* 2020;**12**:e121111. doi:10.1002/dad2.12111  
21
- 22 28 Liu L, Goodarzi Z, Jones A, *et al.* Factors associated with virtual care access in older adults: a cross-sectional  
23 study. *Age Ageing* 2021;**50**:1412–5. doi:10.1093/ageing/afab021  
24  
25
- 26 29 Geographic Variation in the Supply and Distribution of Comprehensive Primary Care Physicians in Ontario,  
27 2014/15. [https://www.ices.on.ca/Publications/Atlases-and-Reports/2017/Geographic-variation-in-](https://www.ices.on.ca/Publications/Atlases-and-Reports/2017/Geographic-variation-in-physician-supply)  
28 [physician-supply](https://www.ices.on.ca/Publications/Atlases-and-Reports/2017/Geographic-variation-in-physician-supply) (accessed 29 Jun 2022).  
29
- 30 30 Canadian Institute for Health Information. COVID-19 Intervention Timeline in Canada | CIHI.  
31 <https://www.cihi.ca/en/covid-19-intervention-timeline-in-canada> (accessed 29 Jun 2022).  
32
- 33 31 Jones A, Mowbray FI, Falk L, *et al.* Variations in long-term care home resident hospitalizations before and  
34 during the COVID-19 pandemic in Ontario. *PLOS ONE* 2022;**17**:e0264240.  
35 doi:10.1371/journal.pone.0264240  
36
- 37 32 Maclagan LC, Wang X, Emdin A, *et al.* Visits to the emergency department by community-dwelling people  
38 with dementia during the first 2 waves of the COVID-19 pandemic in Ontario: a repeated cross-sectional  
39 analysis. *Canadian Medical Association Open Access Journal* 2022;**10**:E610–21.  
40  
41
- 42 33 Canadian Institute for Health Information. COVID-19's effect on hospital care services.  
43 [https://www.cihi.ca/en/covid-19-resources/impact-of-covid-19-on-canadas-health-care-systems/covid-](https://www.cihi.ca/en/covid-19-resources/impact-of-covid-19-on-canadas-health-care-systems/covid-19s-effect-on-hospital)  
44 [19s-effect-on-hospital](https://www.cihi.ca/en/covid-19-resources/impact-of-covid-19-on-canadas-health-care-systems/covid-19s-effect-on-hospital) (accessed 18 Oct 2021).  
45
- 46 34 Weir S, Steffler M, Li Y, *et al.* Use of the Population Grouping Methodology of the Canadian Institute for  
47 Health Information to predict high-cost health system users in Ontario. *CMAJ* 2020;**192**:E907–12.  
48 doi:10.1503/cmaj.191297  
49
- 50 35 Liu Y-H, Chen Y, Wang Q-H, *et al.* One-Year Trajectory of Cognitive Changes in Older Survivors of COVID-19  
51 in Wuhan, China: A Longitudinal Cohort Study. *JAMA Neurology* 2022;**79**:509–17.  
52 doi:10.1001/jamaneurol.2022.0461  
53  
54
- 55 36 Gamble LD, Matthews FE, Jones IR, *et al.* Characteristics of people living with undiagnosed dementia:  
56 findings from the CFAS Wales study. *BMC Geriatrics* 2022;**22**:409. doi:10.1186/s12877-022-03086-4  
57  
58  
59

- 1  
2 37 Bradford A, Kunik ME, Schulz P, *et al.* Missed and Delayed Diagnosis of Dementia in Primary Care:  
3 Prevalence and Contributing Factors. *Alzheimer Dis Assoc Disord* 2009;**23**:306–14.  
4 doi:10.1097/WAD.0b013e3181a6bebc  
5
- 6 38 Jackson TA, Gladman JRF, Harwood RH, *et al.* Challenges and opportunities in understanding dementia and  
7 delirium in the acute hospital. *PLOS Medicine* 2017;**14**:e1002247. doi:10.1371/journal.pmed.1002247  
8  
9

## 10 11 12 **Figure Legends** 13

14 **Figure 1.** Claims-based incidence of dementia in Ontario, Canada between 2015-2021, by data source  
15

16  
17 **Figure 2.** Claims-based incidence of dementia in Ontario, Canada between 2015-2021, by sex, age, and  
18 community size, and count of health conditions  
19  
20  
21  
22  
23  
24  
25  
26  
27  
28  
29  
30  
31  
32  
33  
34  
35  
36  
37  
38  
39  
40  
41  
42  
43  
44  
45  
46  
47  
48  
49  
50  
51  
52  
53  
54  
55  
56  
57  
58  
59  
60



1  
2  
3  
4  
5  
6  
7  
8  
9  
10  
11  
12  
13  
14  
15  
16  
17  
18  
19  
20  
21  
22  
23  
24  
25  
26  
27  
28  
29  
30  
31  
32  
33  
34  
35  
36  
37  
38  
39  
40  
41  
42  
43  
44

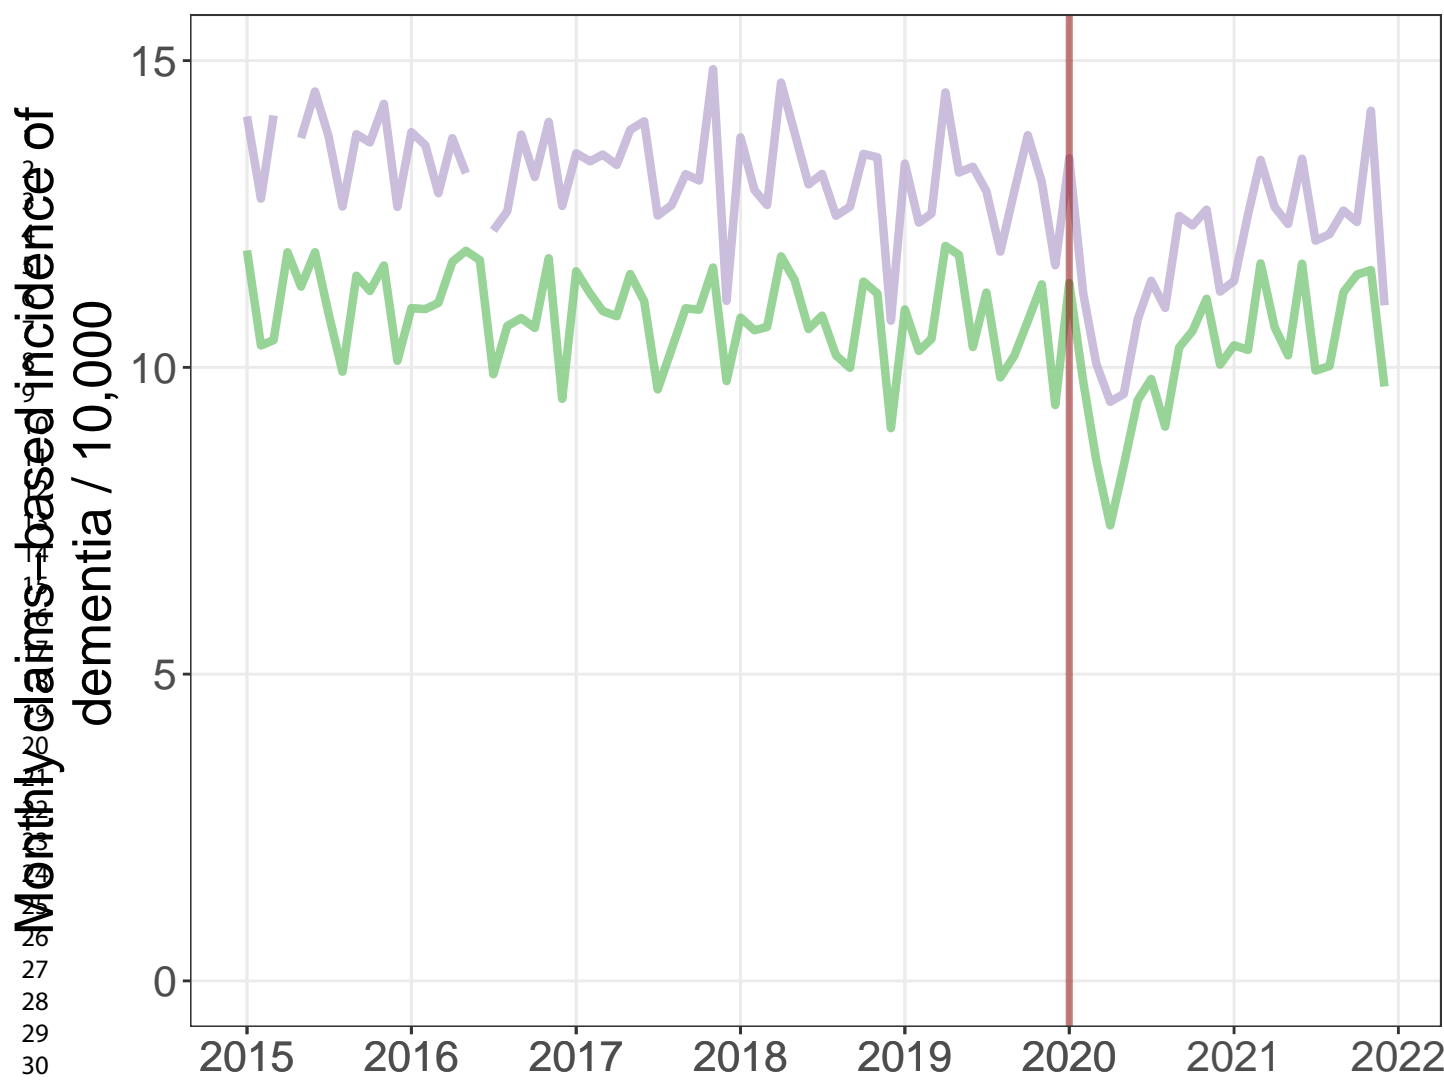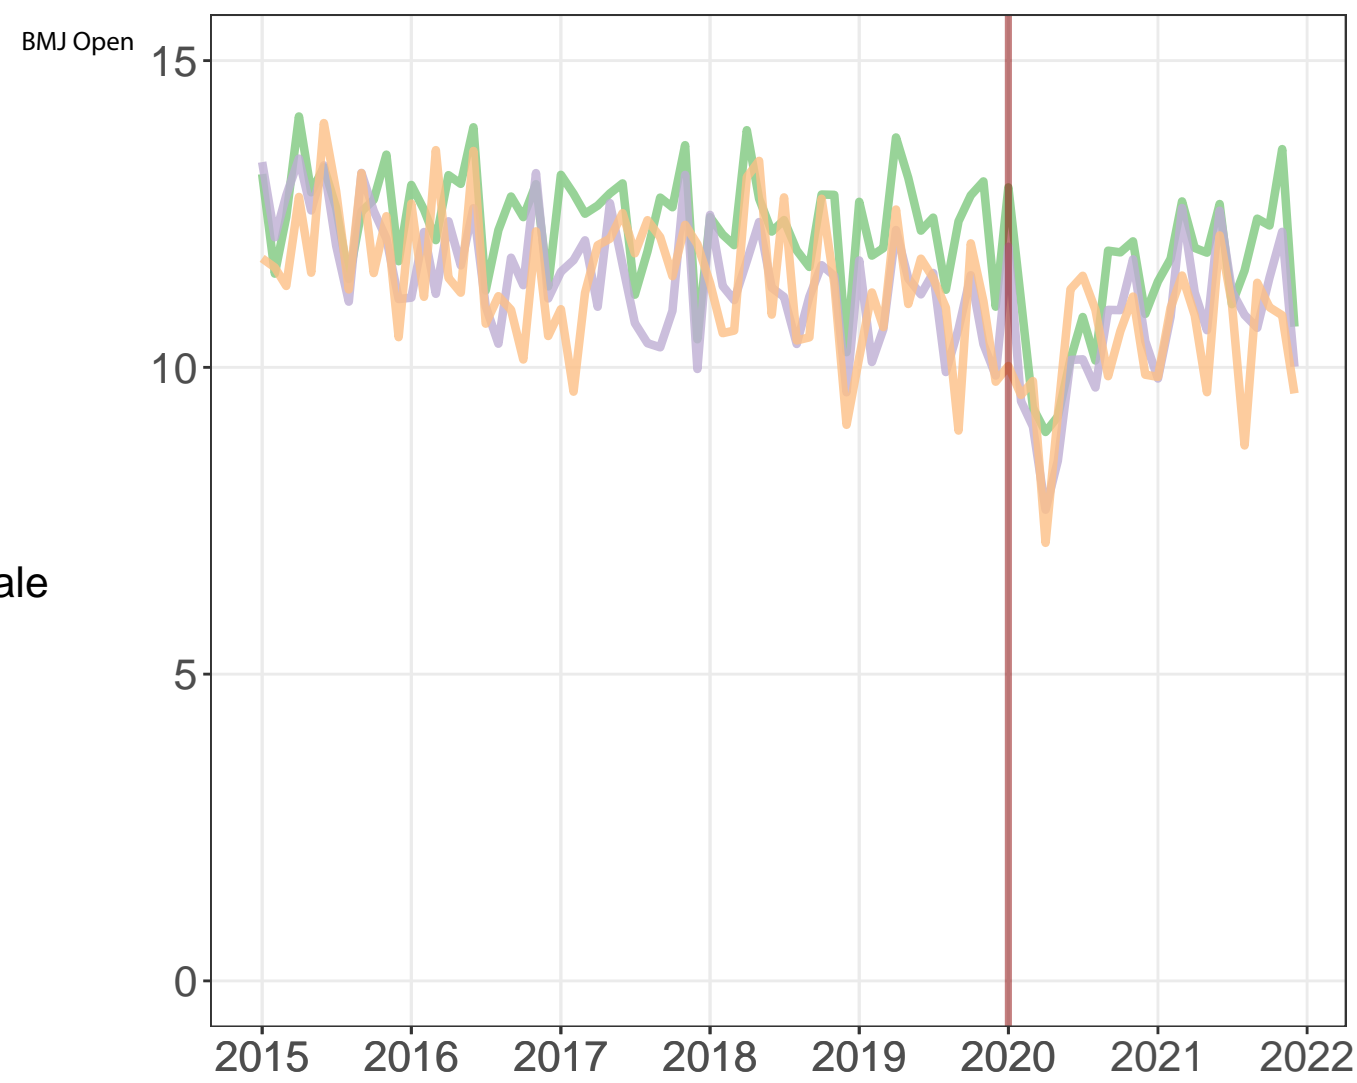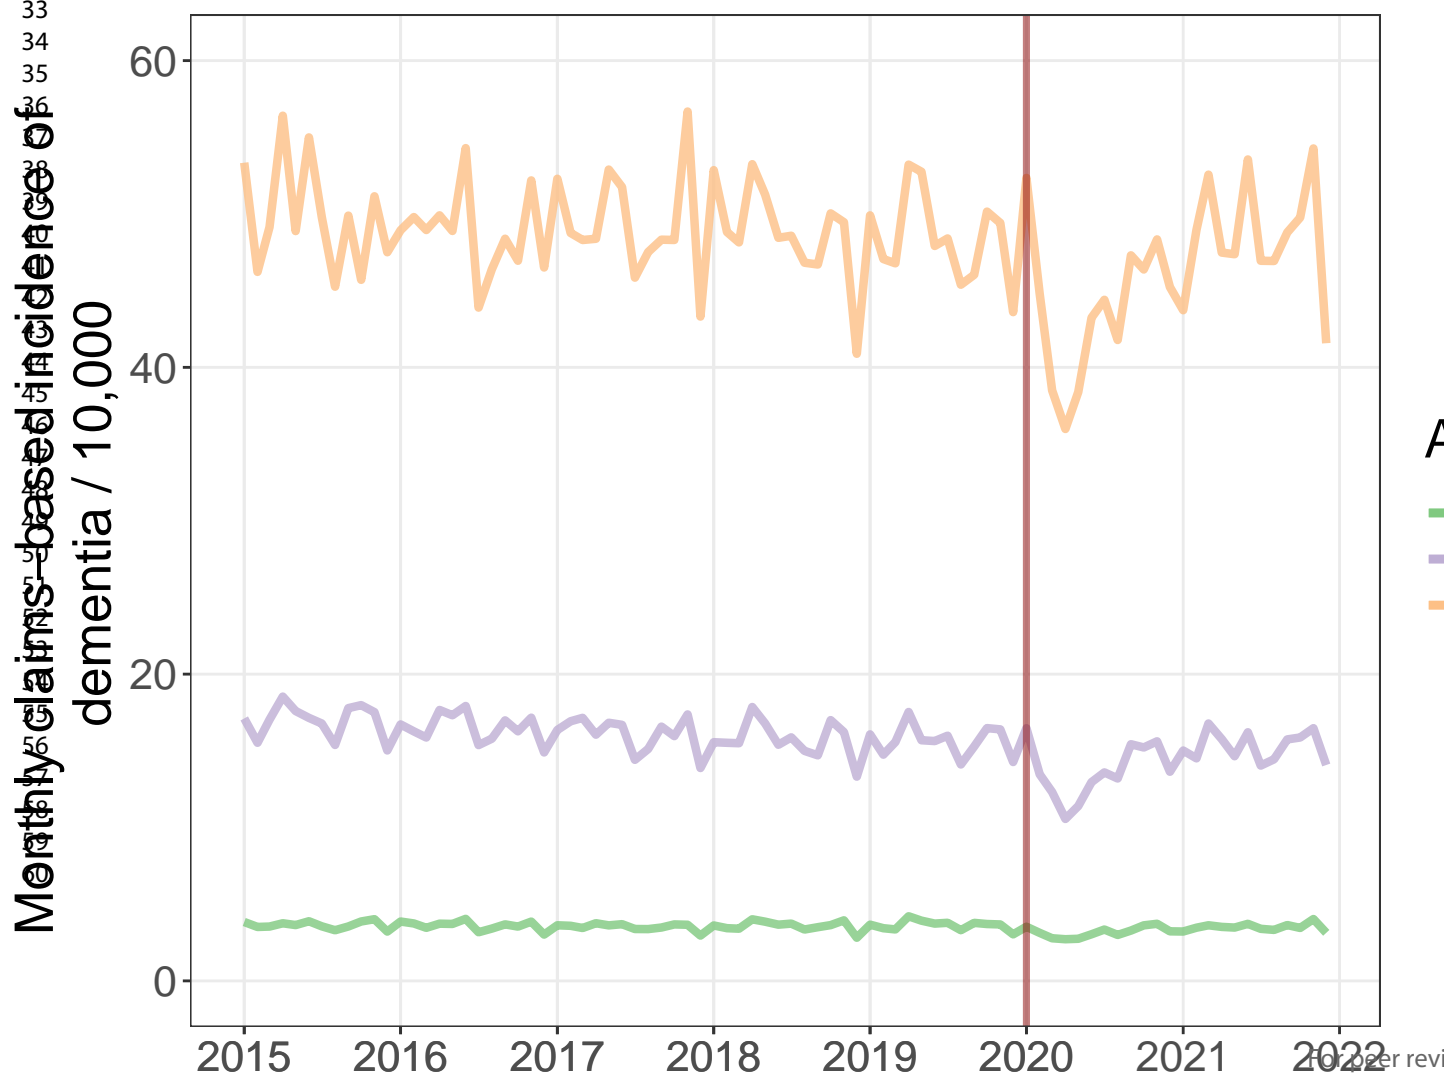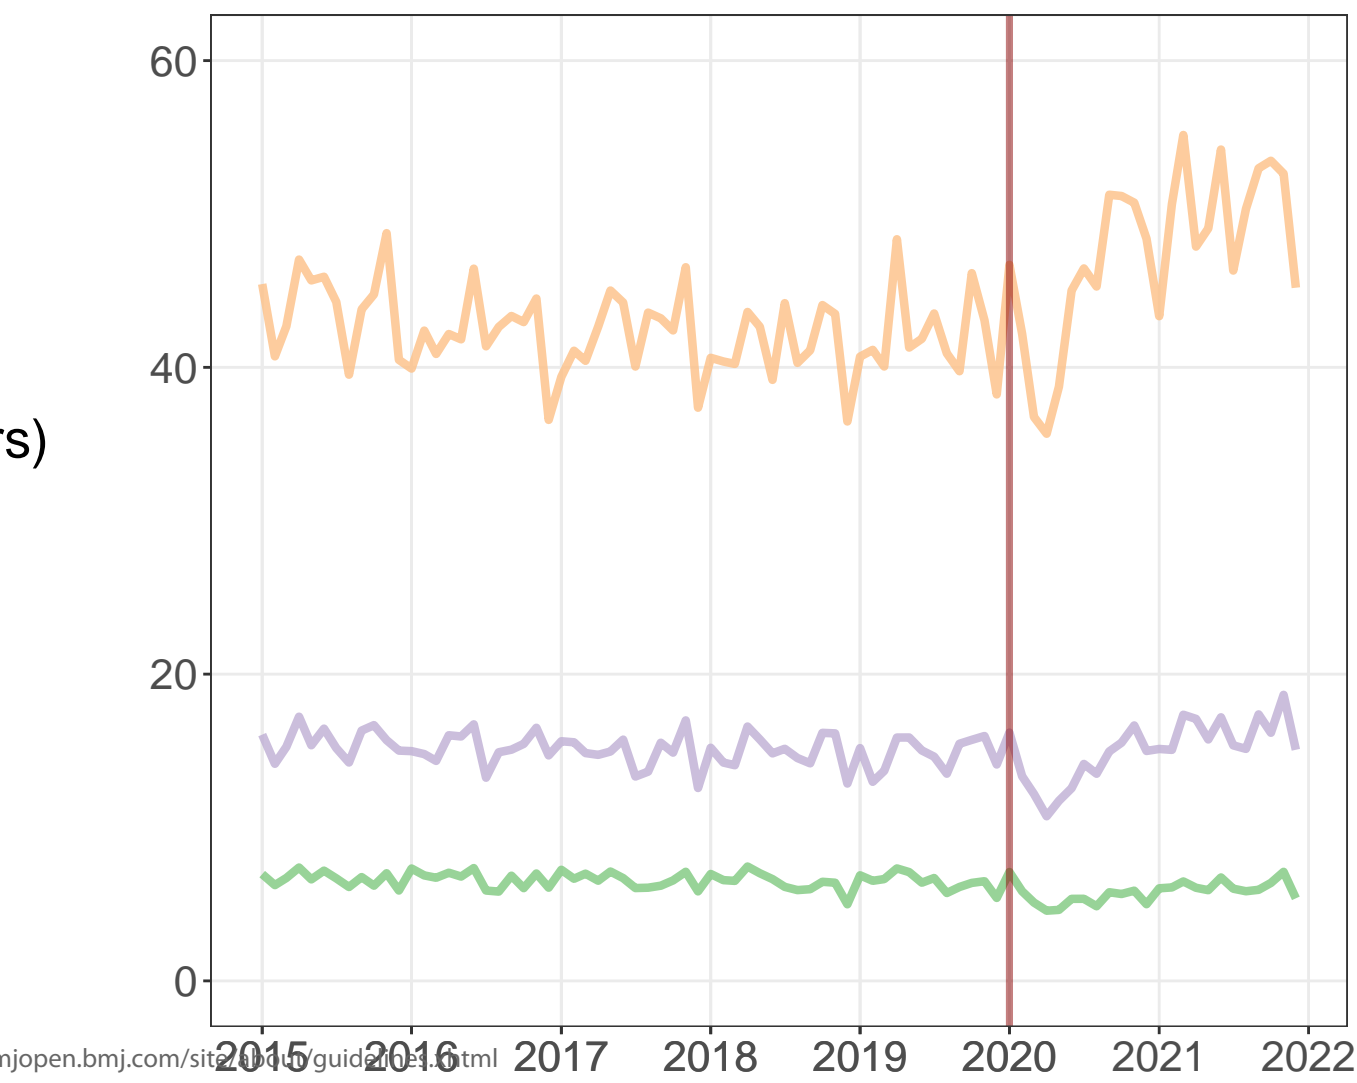

**Supplemental Table 1: ICD-10-ca codes and Anatomical Therapeutic Chemical (ATC) codes used in dementia case ascertainment**

| ICD-10-CA                                             | ATC Codes | Generic Name           |
|-------------------------------------------------------|-----------|------------------------|
| G30 (Alzheimer's disease)                             | N06DA02   | Donepezil              |
| F00 (Dementia in Alzheimer's disease)                 | N06DA03   | Rivastigmine           |
| F01 (Vascular dementia)                               | N06DA04   | Galantamine            |
| F02 (Dementia in other diseases classified elsewhere) | N06DX01   | Memantine <sup>1</sup> |
| F03 (Unspecified dementia)                            |           |                        |

1. Memantine is approved by Health Canada but is not included in the Ontario Drug Benefit Formulary so had no impact on this study

**Supplemental Table 2. Observed and age-sex standardized claims-based dementia incidence Jan 2015 to Dec 2021, Ontario, Canada**

| Month   | Observed incidence | Standardized incidence <sup>1</sup> | Difference |
|---------|--------------------|-------------------------------------|------------|
| Jan2015 | 13.09              | 13.09                               | 0.00       |
| Feb2015 | 11.65              | 11.66                               | 0.00       |
| Mar2015 | 12.43              | 12.44                               | 0.01       |
| Apr2015 | 13.79              | 13.79                               | 0.00       |
| May2015 | 12.63              | 12.64                               | 0.01       |
| Jun2015 | 13.29              | 13.30                               | 0.00       |
| Jul2015 | 12.44              | 12.44                               | 0.00       |
| Aug2015 | 11.38              | 11.39                               | 0.00       |
| Sep2015 | 12.74              | 12.75                               | 0.01       |
| Oct2015 | 12.55              | 12.56                               | 0.00       |
| Nov2015 | 13.09              | 13.08                               | 0.00       |
| Dec2015 | 11.46              | 11.47                               | 0.00       |
| Jan2016 | 12.51              | 12.52                               | 0.00       |
| Feb2016 | 12.39              | 12.40                               | 0.00       |
| Mar2016 | 12.02              | 12.02                               | 0.00       |
| Apr2016 | 12.81              | 12.82                               | 0.01       |
| May2016 | 12.58              | 12.59                               | 0.01       |
| Jun2016 | 13.54              | 13.55                               | 0.01       |
| Jul2016 | 11.15              | 11.16                               | 0.01       |
| Aug2016 | 11.68              | 11.70                               | 0.01       |
| Sep2016 | 12.42              | 12.43                               | 0.02       |
| Oct2016 | 11.97              | 11.98                               | 0.01       |

|    |         |       |       |      |
|----|---------|-------|-------|------|
| 1  |         |       |       |      |
| 2  |         |       |       |      |
| 3  | Nov2016 | 12.98 | 12.99 | 0.01 |
| 4  | Dec2016 | 11.18 | 11.22 | 0.03 |
| 5  | Jan2017 | 12.60 | 12.62 | 0.01 |
| 6  | Feb2017 | 12.37 | 12.40 | 0.03 |
| 7  | Mar2017 | 12.29 | 12.34 | 0.04 |
| 8  | Apr2017 | 12.16 | 12.20 | 0.03 |
| 9  | May2017 | 12.79 | 12.82 | 0.03 |
| 10 | Jun2017 | 12.66 | 12.71 | 0.05 |
| 11 | Jul2017 | 11.17 | 11.21 | 0.05 |
| 12 | Aug2017 | 11.56 | 11.60 | 0.04 |
| 13 | Sep2017 | 12.14 | 12.18 | 0.04 |
| 14 | Oct2017 | 12.07 | 12.11 | 0.04 |
| 15 | Nov2017 | 13.37 | 13.42 | 0.05 |
| 16 | Dec2017 | 10.48 | 10.52 | 0.04 |
| 17 | Jan2018 | 12.39 | 12.44 | 0.04 |
| 18 | Feb2018 | 11.84 | 11.89 | 0.05 |
| 19 | Mar2018 | 11.73 | 11.79 | 0.06 |
| 20 | Apr2018 | 13.34 | 13.41 | 0.08 |
| 21 | May2018 | 12.72 | 12.78 | 0.06 |
| 22 | Jun2018 | 11.89 | 11.96 | 0.06 |
| 23 | Jul2018 | 12.09 | 12.16 | 0.07 |
| 24 | Aug2018 | 11.42 | 11.48 | 0.06 |
| 25 | Sep2018 | 11.41 | 11.47 | 0.06 |
| 26 | Oct2018 | 12.52 | 12.59 | 0.07 |
| 27 | Nov2018 | 12.40 | 12.48 | 0.08 |
| 28 | Dec2018 | 9.95  | 10.02 | 0.07 |
| 29 | Jan2019 | 12.22 | 12.31 | 0.08 |
| 30 | Feb2019 | 11.39 | 11.48 | 0.09 |
| 31 | Mar2019 | 11.56 | 11.65 | 0.09 |
| 32 | Apr2019 | 13.33 | 13.43 | 0.11 |
| 33 | May2019 | 12.56 | 12.63 | 0.07 |
| 34 | Jun2019 | 11.91 | 12.02 | 0.11 |
| 35 | Jul2019 | 12.11 | 12.20 | 0.09 |
| 36 | Aug2019 | 10.94 | 11.03 | 0.09 |
| 37 | Sep2019 | 11.63 | 11.75 | 0.12 |
| 38 | Oct2019 | 12.38 | 12.50 | 0.12 |
| 39 | Nov2019 | 12.25 | 12.37 | 0.12 |
| 40 | Dec2019 | 10.61 | 10.74 | 0.13 |
| 41 | Jan2020 | 12.47 | 12.62 | 0.15 |
| 42 | Feb2020 | 10.55 | 10.66 | 0.12 |
| 43 | Mar2020 | 9.33  | 9.44  | 0.11 |
| 44 | Apr2020 | 8.51  | 8.62  | 0.11 |
| 45 | May2020 | 9.03  | 9.13  | 0.10 |
| 46 | Jun2020 | 10.17 | 10.29 | 0.12 |
| 47 | Jul2020 | 10.67 | 10.79 | 0.12 |
| 48 |         |       |       |      |
| 49 |         |       |       |      |
| 50 |         |       |       |      |
| 51 |         |       |       |      |
| 52 |         |       |       |      |
| 53 |         |       |       |      |
| 54 |         |       |       |      |
| 55 |         |       |       |      |
| 56 |         |       |       |      |
| 57 |         |       |       |      |
| 58 |         |       |       |      |
| 59 |         |       |       |      |
| 60 |         |       |       |      |

1  
2  
3  
4  
5  
6  
7  
8  
9  
10  
11  
12  
13  
14  
15  
16  
17  
18  
19  
20  
21  
22  
23  
24  
25  
26  
27  
28  
29  
30  
31  
32  
33  
34  
35  
36  
37  
38  
39  
40  
41  
42  
43  
44  
45  
46  
47  
48  
49  
50  
51  
52  
53  
54  
55  
56  
57  
58  
59  
60

|         |       |       |      |
|---------|-------|-------|------|
| Aug2020 | 10.07 | 10.19 | 0.11 |
| Sep2020 | 11.48 | 11.62 | 0.14 |
| Oct2020 | 11.52 | 11.66 | 0.14 |
| Nov2020 | 11.90 | 12.05 | 0.15 |
| Dec2020 | 10.69 | 10.82 | 0.13 |
| Jan2021 | 10.92 | 11.06 | 0.14 |
| Feb2021 | 11.47 | 11.63 | 0.16 |
| Mar2021 | 12.60 | 12.78 | 0.18 |
| Apr2021 | 11.71 | 11.88 | 0.17 |
| May2021 | 11.35 | 11.50 | 0.16 |
| Jun2021 | 12.61 | 12.78 | 0.17 |
| Jul2021 | 11.09 | 11.23 | 0.14 |
| Aug2021 | 11.18 | 11.30 | 0.13 |
| Sep2021 | 11.94 | 12.08 | 0.14 |
| Oct2021 | 11.97 | 12.10 | 0.13 |
| Nov2021 | 12.98 | 13.12 | 0.14 |
| Dec2021 | 10.40 | 10.50 | 0.10 |

---

1. Incidence standardized to the age (65-74,75-84,85+) and sex (M/F) group distribution of Ontario as of January 2015.



**Supplemental Table 3.** Changes in the claims-based dementia incidence during the COVID-19 pandemic with cumulative differences between observed and expected cases, overall, using standardized incidence rates, and in the community-dwelling population

| Measure                                                                              | Overall              | Standardized Rates   | Community-dwelling population |
|--------------------------------------------------------------------------------------|----------------------|----------------------|-------------------------------|
| 2019 Average incidence / 10,000                                                      | 11.9                 | 12.0                 | 10.3                          |
| 2020 Nadir incidence / 10,000                                                        | 8.5                  | 8.62                 | 7.04                          |
| Percent drop in incidence at nadir vs. expected                                      | 32.6%                | 32.20%               | 35.20%                        |
| 2020 Cumulative difference observed vs. expected cases (in months of new cases)      | -1.21 (-1.32, -1.08) | -1.19 (-1.31, -1.06) | -1.17 (-1.31, -1.03)          |
| 2021 Cumulative difference observed vs. expected cases (in months of new cases)      | 0.16 (0.01, 0.32)    | 0.16 (0.01, 0.33)    | 0.28 (0.09, 0.46)             |
| 2020-2021 Cumulative difference observed vs. expected cases (in months of new cases) | -1.05 (-1.31, -0.77) | -1.04 (-1.30, -0.73) | -0.89 (-1.23, -0.57)          |

STROBE Statement—Checklist of items that should be included in reports of *cohort studies*

|                           | Item No | Recommendation                                                                                                                                                                                                                                                                                                         | Page No              |
|---------------------------|---------|------------------------------------------------------------------------------------------------------------------------------------------------------------------------------------------------------------------------------------------------------------------------------------------------------------------------|----------------------|
| <b>Title and abstract</b> | 1       | (a) Indicate the study's design with a commonly used term in the title or the abstract                                                                                                                                                                                                                                 | 2                    |
|                           |         | (b) Provide in the abstract an informative and balanced summary of what was done and what was found                                                                                                                                                                                                                    | 2                    |
| <b>Introduction</b>       |         |                                                                                                                                                                                                                                                                                                                        |                      |
| Background/rationale      | 2       | Explain the scientific background and rationale for the investigation being reported                                                                                                                                                                                                                                   | 3                    |
| Objectives                | 3       | State specific objectives, including any prespecified hypotheses                                                                                                                                                                                                                                                       | 3                    |
| <b>Methods</b>            |         |                                                                                                                                                                                                                                                                                                                        |                      |
| Study design              | 4       | Present key elements of study design early in the paper                                                                                                                                                                                                                                                                | 4                    |
| Setting                   | 5       | Describe the setting, locations, and relevant dates, including periods of recruitment, exposure, follow-up, and data collection                                                                                                                                                                                        | 4,5                  |
| Participants              | 6       | (a) Give the eligibility criteria, and the sources and methods of selection of participants. Describe methods of follow-up<br>(b) For matched studies, give matching criteria and number of exposed and unexposed                                                                                                      | 4                    |
| Variables                 | 7       | Clearly define all outcomes, exposures, predictors, potential confounders, and effect modifiers. Give diagnostic criteria, if applicable                                                                                                                                                                               | 5                    |
| Data sources/measurement  | 8*      | For each variable of interest, give sources of data and details of methods of assessment (measurement). Describe comparability of assessment methods if there is more than one group                                                                                                                                   | 4                    |
| Bias                      | 9       | Describe any efforts to address potential sources of bias                                                                                                                                                                                                                                                              | 6                    |
| Study size                | 10      | Explain how the study size was arrived at                                                                                                                                                                                                                                                                              | 5                    |
| Quantitative variables    | 11      | Explain how quantitative variables were handled in the analyses. If applicable, describe which groupings were chosen and why                                                                                                                                                                                           | 5,6                  |
| Statistical methods       | 12      | (a) Describe all statistical methods, including those used to control for confounding<br>(b) Describe any methods used to examine subgroups and interactions<br>(c) Explain how missing data were addressed<br>(d) If applicable, explain how loss to follow-up was addressed<br>(e) Describe any sensitivity analyses | 5,6                  |
| <b>Results</b>            |         |                                                                                                                                                                                                                                                                                                                        |                      |
| Participants              | 13*     | (a) Report numbers of individuals at each stage of study—eg numbers potentially eligible, examined for eligibility, confirmed eligible, included in the study, completing follow-up, and analysed<br>(b) Give reasons for non-participation at each stage<br>(c) Consider use of a flow diagram                        | 7                    |
| Descriptive data          | 14*     | (a) Give characteristics of study participants (eg demographic, clinical, social) and information on exposures and potential confounders<br>(b) Indicate number of participants with missing data for each variable of interest<br>(c) Summarise follow-up time (eg, average and total amount)                         | NA - aggregated data |
| Outcome data              | 15*     | Report numbers of outcome events or summary measures over time                                                                                                                                                                                                                                                         | 7, Table 1           |

|    |                          |    |                                                                                                                                                                                                              |                    |
|----|--------------------------|----|--------------------------------------------------------------------------------------------------------------------------------------------------------------------------------------------------------------|--------------------|
| 1  | Main results             | 16 | (a) Give unadjusted estimates and, if applicable, confounder-adjusted estimates and their precision (eg, 95% confidence interval). Make clear which confounders were adjusted for and why they were included | 7, Tables, Figures |
| 2  |                          |    | (b) Report category boundaries when continuous variables were categorized                                                                                                                                    |                    |
| 3  |                          |    | (c) If relevant, consider translating estimates of relative risk into absolute risk for a meaningful time period                                                                                             |                    |
| 4  |                          |    |                                                                                                                                                                                                              |                    |
| 5  |                          |    |                                                                                                                                                                                                              |                    |
| 6  |                          |    |                                                                                                                                                                                                              |                    |
| 7  |                          |    |                                                                                                                                                                                                              |                    |
| 8  |                          |    |                                                                                                                                                                                                              |                    |
| 9  | Other analyses           | 17 | Report other analyses done—eg analyses of subgroups and interactions, and sensitivity analyses                                                                                                               | 10                 |
| 10 |                          |    |                                                                                                                                                                                                              |                    |
| 11 | <b>Discussion</b>        |    |                                                                                                                                                                                                              |                    |
| 12 |                          |    |                                                                                                                                                                                                              |                    |
| 13 | Key results              | 18 | Summarise key results with reference to study objectives                                                                                                                                                     | 11                 |
| 14 | Limitations              | 19 | Discuss limitations of the study, taking into account sources of potential bias or imprecision. Discuss both direction and magnitude of any potential bias                                                   | 13                 |
| 15 |                          |    |                                                                                                                                                                                                              |                    |
| 16 | Interpretation           | 20 | Give a cautious overall interpretation of results considering objectives, limitations, multiplicity of analyses, results from similar studies, and other relevant evidence                                   | 11,12              |
| 17 |                          |    |                                                                                                                                                                                                              |                    |
| 18 |                          |    |                                                                                                                                                                                                              |                    |
| 19 | Generalisability         | 21 | Discuss the generalisability (external validity) of the study results                                                                                                                                        | 13                 |
| 20 |                          |    |                                                                                                                                                                                                              |                    |
| 21 | <b>Other information</b> |    |                                                                                                                                                                                                              |                    |
| 22 | Funding                  | 22 | Give the source of funding and the role of the funders for the present study and, if applicable, for the original study on which the present article is based                                                | 14                 |
| 23 |                          |    |                                                                                                                                                                                                              |                    |
| 24 |                          |    |                                                                                                                                                                                                              |                    |

\*Give information separately for exposed and unexposed groups.

**Note:** An Explanation and Elaboration article discusses each checklist item and gives methodological background and published examples of transparent reporting. The STROBE checklist is best used in conjunction with this article (freely available on the Web sites of PLoS Medicine at <http://www.plosmedicine.org/>, Annals of Internal Medicine at <http://www.annals.org/>, and Epidemiology at <http://www.epidem.com/>). Information on the STROBE Initiative is available at <http://www.strobe-statement.org>.
