# Supplementary material for: Examining the immediate and ongoing impact of the COVID-19 pandemic on population-based estimates of dementia: a population-based time series analysis in Ontario, Canada
Source: PubMed Central journal article supplement — BMJ Open. 2023 Jan 13;13(1):e067689. doi: 10.1136/bmjopen-2022-067689 (PMC9842601; doi:10.1136/bmjopen-2022-067689), 2023-01-13
Supplement: bmjopen-2022-067689supp001.pdf [file bmjopen-2022-067689supp001.pdf]

**Supplemental Table 1:** ICD-10-ca codes and Anatomical Therapeutic Chemical (ATC) codes used in dementia case ascertainment

| ICD-10-CA                                             | ATC Codes | Generic Name           |
|-------------------------------------------------------|-----------|------------------------|
| G30 (Alzheimer's disease)                             | N06DA02   | Donepezil              |
| F00 (Dementia in Alzheimer's disease)                 | N06DA03   | Rivastigmine           |
| F01 (Vascular dementia)                               | N06DA04   | Galantamine            |
| F02 (Dementia in other diseases classified elsewhere) | N06DX01   | Memantine <sup>1</sup> |
| F03 (Unspecified dementia)                            |           |                        |

1. Memantine is approved by Health Canada but is not included in the Ontario Drug Benefit Formulary so had no impact on this study

**Supplemental Table 2.** Observed and age-sex standardized claims-based dementia incidence Jan 2015 to Dec 2021, Ontario, Canada

| Month   | Observed incidence | Standardized incidence <sup>1</sup> | Difference |
|---------|--------------------|-------------------------------------|------------|
| Jan2015 | 13.09              | 13.09                               | 0.00       |
| Feb2015 | 11.65              | 11.66                               | 0.00       |
| Mar2015 | 12.43              | 12.44                               | 0.01       |
| Apr2015 | 13.79              | 13.79                               | 0.00       |
| May2015 | 12.63              | 12.64                               | 0.01       |
| Jun2015 | 13.29              | 13.30                               | 0.00       |
| Jul2015 | 12.44              | 12.44                               | 0.00       |
| Aug2015 | 11.38              | 11.39                               | 0.00       |
| Sep2015 | 12.74              | 12.75                               | 0.01       |
| Oct2015 | 12.55              | 12.56                               | 0.00       |
| Nov2015 | 13.09              | 13.08                               | 0.00       |
| Dec2015 | 11.46              | 11.47                               | 0.00       |
| Jan2016 | 12.51              | 12.52                               | 0.00       |
| Feb2016 | 12.39              | 12.40                               | 0.00       |
| Mar2016 | 12.02              | 12.02                               | 0.00       |
| Apr2016 | 12.81              | 12.82                               | 0.01       |
| May2016 | 12.58              | 12.59                               | 0.01       |
| Jun2016 | 13.54              | 13.55                               | 0.01       |
| Jul2016 | 11.15              | 11.16                               | 0.01       |
| Aug2016 | 11.68              | 11.70                               | 0.01       |
| Sep2016 | 12.42              | 12.43                               | 0.02       |
| Oct2016 | 11.97              | 11.98                               | 0.01       |

|         |       |       |      |
|---------|-------|-------|------|
| Nov2016 | 12.98 | 12.99 | 0.01 |
| Dec2016 | 11.18 | 11.22 | 0.03 |
| Jan2017 | 12.60 | 12.62 | 0.01 |
| Feb2017 | 12.37 | 12.40 | 0.03 |
| Mar2017 | 12.29 | 12.34 | 0.04 |
| Apr2017 | 12.16 | 12.20 | 0.03 |
| May2017 | 12.79 | 12.82 | 0.03 |
| Jun2017 | 12.66 | 12.71 | 0.05 |
| Jul2017 | 11.17 | 11.21 | 0.05 |
| Aug2017 | 11.56 | 11.60 | 0.04 |
| Sep2017 | 12.14 | 12.18 | 0.04 |
| Oct2017 | 12.07 | 12.11 | 0.04 |
| Nov2017 | 13.37 | 13.42 | 0.05 |
| Dec2017 | 10.48 | 10.52 | 0.04 |
| Jan2018 | 12.39 | 12.44 | 0.04 |
| Feb2018 | 11.84 | 11.89 | 0.05 |
| Mar2018 | 11.73 | 11.79 | 0.06 |
| Apr2018 | 13.34 | 13.41 | 0.08 |
| May2018 | 12.72 | 12.78 | 0.06 |
| Jun2018 | 11.89 | 11.96 | 0.06 |
| Jul2018 | 12.09 | 12.16 | 0.07 |
| Aug2018 | 11.42 | 11.48 | 0.06 |
| Sep2018 | 11.41 | 11.47 | 0.06 |
| Oct2018 | 12.52 | 12.59 | 0.07 |
| Nov2018 | 12.40 | 12.48 | 0.08 |
| Dec2018 | 9.95  | 10.02 | 0.07 |
| Jan2019 | 12.22 | 12.31 | 0.08 |
| Feb2019 | 11.39 | 11.48 | 0.09 |
| Mar2019 | 11.56 | 11.65 | 0.09 |
| Apr2019 | 13.33 | 13.43 | 0.11 |
| May2019 | 12.56 | 12.63 | 0.07 |
| Jun2019 | 11.91 | 12.02 | 0.11 |
| Jul2019 | 12.11 | 12.20 | 0.09 |
| Aug2019 | 10.94 | 11.03 | 0.09 |
| Sep2019 | 11.63 | 11.75 | 0.12 |
| Oct2019 | 12.38 | 12.50 | 0.12 |
| Nov2019 | 12.25 | 12.37 | 0.12 |
| Dec2019 | 10.61 | 10.74 | 0.13 |
| Jan2020 | 12.47 | 12.62 | 0.15 |
| Feb2020 | 10.55 | 10.66 | 0.12 |
| Mar2020 | 9.33  | 9.44  | 0.11 |
| Apr2020 | 8.51  | 8.62  | 0.11 |
| May2020 | 9.03  | 9.13  | 0.10 |
| Jun2020 | 10.17 | 10.29 | 0.12 |
| Jul2020 | 10.67 | 10.79 | 0.12 |

---

|         |       |       |      |
|---------|-------|-------|------|
| Aug2020 | 10.07 | 10.19 | 0.11 |
| Sep2020 | 11.48 | 11.62 | 0.14 |
| Oct2020 | 11.52 | 11.66 | 0.14 |
| Nov2020 | 11.90 | 12.05 | 0.15 |
| Dec2020 | 10.69 | 10.82 | 0.13 |
| Jan2021 | 10.92 | 11.06 | 0.14 |
| Feb2021 | 11.47 | 11.63 | 0.16 |
| Mar2021 | 12.60 | 12.78 | 0.18 |
| Apr2021 | 11.71 | 11.88 | 0.17 |
| May2021 | 11.35 | 11.50 | 0.16 |
| Jun2021 | 12.61 | 12.78 | 0.17 |
| Jul2021 | 11.09 | 11.23 | 0.14 |
| Aug2021 | 11.18 | 11.30 | 0.13 |
| Sep2021 | 11.94 | 12.08 | 0.14 |
| Oct2021 | 11.97 | 12.10 | 0.13 |
| Nov2021 | 12.98 | 13.12 | 0.14 |
| Dec2021 | 10.40 | 10.50 | 0.10 |

---

1. Incidence standardized to the age (65-74,75-84,85+) and sex (M/F) group distribution of Ontario as of January 2015.

**Supplemental Table 3.** Changes in the claims-based dementia incidence during the COVID-19 pandemic with cumulative differences between observed and expected cases, overall, using standardized incidence rates, and in the community-dwelling population

| Measure                                                                              | Overall              | Standardized Rates   | Community-dwelling population |
|--------------------------------------------------------------------------------------|----------------------|----------------------|-------------------------------|
| 2019 Average incidence / 10,000                                                      | 11.9                 | 12.0                 | 10.3                          |
| 2020 Nadir incidence / 10,000                                                        | 8.5                  | 8.62                 | 7.04                          |
| Percent drop in incidence at nadir vs. expected                                      | 32.6%                | 32.20%               | 35.20%                        |
| 2020 Cumulative difference observed vs. expected cases (in months of new cases)      | -1.21 (-1.32, -1.08) | -1.19 (-1.31, -1.06) | -1.17 (-1.31, -1.03)          |
| 2021 Cumulative difference observed vs. expected cases (in months of new cases)      | 0.16 (0.01, 0.32)    | 0.16 (0.01, 0.33)    | 0.28 (0.09, 0.46)             |
| 2020-2021 Cumulative difference observed vs. expected cases (in months of new cases) | -1.05 (-1.31, -0.77) | -1.04 (-1.30, -0.73) | -0.89 (-1.23, -0.57)          |
